# Supplementary material for: Diastereoselective oxidative α-amination of aliphatic aldehydes catalyzed by iodine: synthesis of syn-γ-hydroxy-α-amino acetals
Source: Royal Society of Chemistry journal article supplement (doi:10.1039/c3ob42043d), 2013-01-01

# Diastereoselective Oxidative $\alpha$ -Amination of Aliphatic Aldehyde Catalyzed by Iodine: Synthesis of *Syn*- $\gamma$ -Hydroxy- $\alpha$ -Amino Acetals

Yun-Xiao Zhang<sup>a</sup>, An-Qi Zhang<sup>a</sup>, Jie-Sheng Tian<sup>b</sup> and Teck-Peng  
Loh<sup>b\*</sup>

<sup>a</sup>*School of Chemistry and molecular Engineering, Zhengzhou University, Zhengzhou 450052, P.R. China*

<sup>b</sup>*Division of Chemistry and Biological Chemistry, School of Physical and Mathematical Sciences, Nanyang Technological University, Singapore 637616. E-mail: [teckpeng@ntu.edu.sg](mailto:teckpeng@ntu.edu.sg); Fax: +65 6515 8229; Tel: +65 6513 8475*

Supplementary Material

## Supporting Information

### Table of Contents

| Entry                                                                                                                                               | Page |
|-----------------------------------------------------------------------------------------------------------------------------------------------------|------|
| General Method                                                                                                                                      | 3    |
| Preparation of substrates                                                                                                                           |      |
| 1. Allylation of aldehydes                                                                                                                          | 3    |
| 2. Protection of homoallylic alcohols                                                                                                               | 6    |
| 3. Preparation of primary alcohols <i>via</i><br>Brown hydroboration reaction                                                                       | 11   |
| 4. Preparation of $\gamma$ -Protected Hydroxyl Aldehydes <i>via</i><br>Swern Oxidation (table 2, materials of <b>1b</b> , <b>1c</b> and <b>1d</b> ) | 16   |
| Preparation of $\gamma$ -Hydroxy(protected)- $\alpha$ -amino Acetals ( <b>1b</b> , <b>1c</b><br>and <b>1d</b> )                                     | 17   |
| Crystal data of <i>syn</i> - <b>10a</b> ( <b>10ab</b> )                                                                                             | 20   |
| NMR spectra                                                                                                                                         | 33   |

## General Method

All reactions were carried out without exclusion of air or moisture unless otherwise stated. Copper salts and Indium salts. Commercial solvents and reagents were used without further purification. Ally-protected hydroxyl aldehydes were synthesized as following description.

Reactions were monitored by thin layer chromatography [Merck 60 F<sub>254</sub> precoated silica gel plate (0.2 mm thickness)]. Subsequent to elution, spots were visualized using UV radiation (254 nm) on Spectroline Model ENF-24061/F 254 nm. Further visualization was possible using iodine vapor absorption as yellow stain. Flash chromatography was performed using Merck silica gel 60 with AR grade solvents.

Infrared spectra were recorded on a Shimadzu IR Prestige-21 FTIR. Liquid samples were examined as film between NaCl salt plates. HRMS spectra were recorded on a Waters Q-ToF Premier Spectrometer.

<sup>1</sup>H NMR and <sup>13</sup>C NMR spectra were recorded using Bruker Avance 400 MHz spectrometers (CDCl<sub>3</sub> as solvent). Chemical shifts for <sup>1</sup>H NMR spectra are reported as δ in units of parts per million (ppm) downfield from SiMe<sub>4</sub> (δ 0.0) and relative to the signal of chloroform-*d* (δ 7.260, singlet). Multiplicities were given as: s (singlet); brs (broad singlet); d (doublet); t (triplet); q (quartet); dd (doublets of doublet); td (triplet of doublet); m (multiplets) and etc. Coupling constants are reported as a *J* value in Hz. <sup>13</sup>C NMR are reported as δ in units of parts per million (ppm) downfield from SiMe<sub>4</sub> (δ 0.0) and relative to the signal of chloroform-*d* (δ 77.00, triplet).

Mass spectral analyses were carried out on a VG 7035 micromass mass spectrophotometer at a source temperature of 200 °C and at an ion current of 70 eV. Mass spectral data were reported in units of mass to charge (*m/z*) and % intensity.

## Preparation of Substrates

### 1. Allylation of Aldehydes

#### General Procedure for Aldehyde Allylation Reactions

Representative procedure for allylation of aldehydes:

#### Preparation of 1-phenylhex-5-en-3-ol

3-Phenylpropanal (3.22 g, 24 mmol) and 3-bromoprop-1-ene (3.48 g, 29 mmol) in THF (30 mL) were added to zinc powder (3.14 g, 48 mmol) in saturated NH<sub>4</sub>Cl solution (60 mL) at room temperature. The resulting mixture was stirred for one hour, diluted with water, extracted with dichloromethane (3 x 50 mL), washed with brine, dried over Na<sub>2</sub>SO<sub>4</sub>. Concentration of the organic phases *in vacuo* gave the crude reaction mixture which was purified *via* silica gel chromatography to afford the homoallylic alcohol as colorless oil (80% yield).<sup>1</sup>

Characterization of homoallylic alcohols:

#### 1-Phenylbut-3-en-1-ol

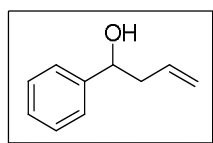

Colorless oil (92% yield); *R*<sub>f</sub> = 0.39 (3:1 hexane/ethyl acetate)

<sup>1</sup>H NMR (400 MHz, CDCl<sub>3</sub>): δ 7.25-7.36 (m, 5H), 5.76-5.86 (m, 1H), 5.13-5.18 (m, 2H), 4.73

<sup>1</sup> A. Durant, J. L. Delplancke, V. Libert and J. Reisse, *Eur. J. Org. Chem.* 1999, 2845.

(dd,  $J_1 = 7.6$ ,  $J_2 = 5.6$ , 1H), 2.47-2.55 (m, 2H), 2.08 (brs., 1H)

$^{13}\text{C}$  NMR (100 MHz,  $\text{CDCl}_3$ ):  $\delta$  143.8, 134.4, 128.2, 127.4, 125.7, 118.0, 73.2, 43.6

FTIR (neat): 3404, 3062, 1641, 1492, 1265  $\text{cm}^{-1}$

HRMS Calcd. for  $\text{C}_{10}\text{H}_{13}\text{O}$  [ $\text{M}+\text{H}^+$ ]: 149.0966. Found: 149.0969

#### 1-(*p*-Tolyl)but-3-en-1-ol

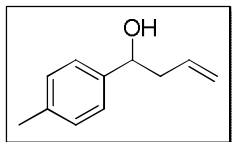

Colorless oil (93% yield);  $R_f = 0.40$  (3:1 hexane/ethyl acetate)

$^1\text{H}$  NMR (400 MHz,  $\text{CDCl}_3$ ):  $\delta$  7.24 (d,  $J = 8.0$ , 2H), 7.15 (d,  $J = 8.0$ , 2H), 5.75-5.86 (m, 1H), 5.12-5.18 (m, 2H), 4.70 (brs., 1H), 2.48-2.52 (m, 2H), 2.34 (s, 3H), 1.99 (brs., 1H)

$^{13}\text{C}$  NMR (100 MHz,  $\text{CDCl}_3$ ):  $\delta$  141.0, 137.2, 134.6, 129.1, 125.8, 118.1, 73.2, 43.8, 21.1

FTIR (neat): 3447, 3050, 1265  $\text{cm}^{-1}$

HRMS Calcd. for  $\text{C}_{11}\text{H}_{15}\text{O}$  [ $\text{M}+\text{H}^+$ ]: 163.1123. Found: 163.1119

#### 1-(4-Ethylphenyl)but-3-en-1-ol

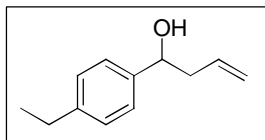

Colorless oil (91% yield);  $R_f = 0.42$  (3:1 hexane/ethyl acetate)

$^1\text{H}$  NMR (400 MHz,  $\text{CDCl}_3$ ):  $\delta$  7.28 (d,  $J = 8.0$ , 2H), 7.18 (d,  $J = 8.0$ , 2H), 5.76-5.87 (m, 1H), 5.12-5.18 (m, 2H), 4.69-4.73 (m, 1H), 2.64 (q,  $J = 7.6$ , 2H), 2.45-2.56 (m, 2H), 1.98 (d,  $J = 3.2$ , 1H), 1.23 (t,  $J = 7.6$ , 3H)

$^{13}\text{C}$  NMR (100 MHz,  $\text{CDCl}_3$ ):  $\delta$  143.5, 141.2, 134.6, 127.8, 125.8, 118.1, 73.2, 43.6, 28.5, 15.5

FTIR (neat): 3443, 3053, 1265  $\text{cm}^{-1}$

HRMS Calcd. for  $\text{C}_{12}\text{H}_{17}\text{O}$  [ $\text{M}+\text{H}^+$ ]: 177.1279. Found: 177.1270

#### 1-Mesitylbut-3-en-1-ol

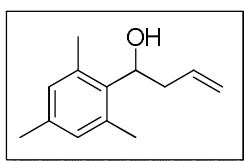

Colorless oil (92% yield);  $R_f = 0.43$  (3:1 hexane/ethyl acetate)

$^1\text{H}$  NMR (400 MHz,  $\text{CDCl}_3$ ):  $\delta$  6.81 (s, 2H), 5.78-5.89 (m, 1H), 5.10-5.19 (m, 3H), 2.66-2.74 (m, 1H), 2.46-2.50 (m, 1H), 2.40 (s, 6H), 2.24 (s, 3H), 1.86 (brs., 1H)

$^{13}\text{C}$  NMR (100 MHz,  $\text{CDCl}_3$ ):  $\delta$  136.6, 136.0, 135.9, 135.3, 130.1, 117.7, 70.7, 40.3, 20.73, 20.7

FTIR (neat): 3416  $\text{cm}^{-1}$

HRMS Calcd. for  $\text{C}_{13}\text{H}_{19}\text{O}$  [ $\text{M}+\text{H}^+$ ]: 191.1436. Found: 191.1440

#### 1-(4-Methoxyphenyl)but-3-en-1-ol

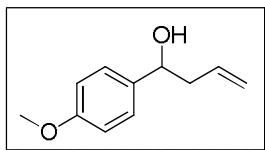



Colorless oil (93% yield);  $R_f = 0.42$  (3:1 hexane/ethyl acetate)

$^1\text{H NMR}$  (400 MHz,  $\text{CDCl}_3$ ):  $\delta$  7.28 (d,  $J = 8.4$ , 2H), 6.88 (d,  $J = 8.8$ , 2H), 5.75-5.85 (m, 1H), 5.11-5.17 (m, 2H), 4.68 (td,  $J_1 = 6.4$ ,  $J_2 = 3.2$ , 1H), 3.80 (s, 3H), 2.50 (t,  $J = 6.8$ , 1H), 1.99 (d,  $J = 2.4$ , 1H)

$^{13}\text{C NMR}$  (100 MHz,  $\text{CDCl}_3$ ):  $\delta$  158.7, 136.0, 134.5, 126.9, 117.6, 113.5, 72.8, 55.0, 43.4

FTIR (neat): 3446, 3074  $\text{cm}^{-1}$

HRMS Calcd. for  $\text{C}_{11}\text{H}_{15}\text{O}_2$  [ $\text{M}+\text{H}^+$ ]: 179.1072. Found: 179.1074

#### 1-(2-Methoxyphenyl)but-3-en-1-ol

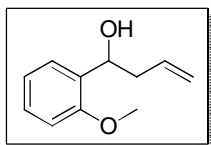

Colorless oil (90% yield);  $R_f = 0.40$  (3:1 hexane/ethyl acetate)

$^1\text{H NMR}$  (400 MHz,  $\text{CDCl}_3$ ):  $\delta$  7.34 (d,  $J = 7.6$ , 1H), 7.23-7.27 (m, 1H), 6.94-6.98 (m, 1H), 6.88 (d,  $J = 8.4$ , 1H), 5.80-5.90 (m, 1H), 5.09-5.16 (m, 2H), 4.93-4.98 (m, 1H), 3.85 (s, 3H), 2.47-2.63 (m, 3H)

$^{13}\text{C NMR}$  (100 MHz,  $\text{CDCl}_3$ ):  $\delta$  156.3, 135.2, 131.8, 128.2, 126.7, 120.6, 117.4, 110.4, 69.4, 55.2, 41.8

FTIR (neat): 3447, 3053, 1265  $\text{cm}^{-1}$

HRMS Calcd. for  $\text{C}_{11}\text{H}_{15}\text{O}_2$  [ $\text{M}+\text{Na}^+$ ]: 201.0891. Found: 201.0906

#### 1-(4-Fluorophenyl)but-3-en-1-ol

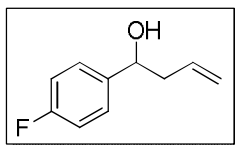

Colorless oil (92% yield);  $R_f = 0.38$  (3:1 hexane/ethyl acetate)

$^1\text{H NMR}$  (400 MHz,  $\text{CDCl}_3$ ):  $\delta$  7.31 (dd,  $J_1 = 8.4$ ,  $J_2 = 5.6$ , 2H), 7.02 (t,  $J = 8.8$ , 2H), 5.73-5.83 (m, 1H), 5.13-5.17 (m, 2H), 4.69-4.73 (m, 1H), 2.42-2.53 (m, 2H), 2.14 (brs., 1H)

$^{13}\text{C NMR}$  (100 MHz,  $\text{CDCl}_3$ ):  $\delta$  162.1 (d,  $J = 244.0$ ), 139.5 (d,  $J = 3.0$ ), 134.1, 127.4 (d,  $J = 8.0$ ), 118.6, 115.2 (d,  $J = 21.0$ ), 72.6, 43.9

FTIR (neat): 3420, 3079, 3055, 1605, 1510, 1265  $\text{cm}^{-1}$

HRMS Calcd. for  $\text{C}_{10}\text{H}_{12}\text{FO}$  [ $\text{M}+\text{H}^+$ ]: 167.0872. Found: 167.0870

#### 1-Phenylhex-5-en-3-ol

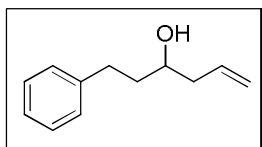

Colorless oil (80% yield);  $R_f = 0.44$  (3:1 hexane/ethyl acetate)

$^1\text{H NMR}$  (400 MHz,  $\text{CDCl}_3$ ):  $\delta$  7.16-7.29 (m, 5H), 5.76-5.86 (m, 1H), 5.11-5.15 (m, 2H), 3.63-3.69 (m, 1H), 2.76-2.84 (m, 1H), 2.64-2.71 (m, 1H), 2.28-2.34 (m, 1H), 2.14-2.21 (m, 1H), 1.71-1.83 (m, 3H)

$^{13}\text{C NMR}$  (100 MHz,  $\text{CDCl}_3$ ):  $\delta$  142.0, 134.6, 128.4, 128.3, 125.8, 118.2, 69.9, 42.0, 38.4, 32.0

FTIR (neat): 3447, 3053, 1265  $\text{cm}^{-1}$

HRMS Calcd. for  $\text{C}_{12}\text{H}_{17}\text{O}$  [ $\text{M}+\text{H}^+$ ]: 177.1279. Found: 177.1272

### Nndec-1-en-4-ol

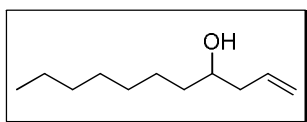

Colorless oil (70% yield);  $R_f = 0.55$  (3:1 hexane/ethyl acetate)

$^1\text{H NMR}$  (400 MHz,  $\text{CDCl}_3$ ):  $\delta$  5.78-5.89 (m, 1H), 5.12-5.16 (m, 2H), 3.61-3.67 (m, 1H), 2.27-2.34 (m, 1H), 2.10-2.18 (m, 1H), 1.62 (brs., 1H), 1.29-1.48 (m, 12H), 0.88 (t,  $J = 6.4$ , 3H)

$^{13}\text{C NMR}$  (100 MHz,  $\text{CDCl}_3$ ):  $\delta$  134.9, 118.0, 70.7, 41.9, 36.8, 31.8, 29.6, 29.2, 25.6, 22.6, 14.1

FTIR (neat): 3441, 3053, 1265  $\text{cm}^{-1}$

HRMS Calcd. for  $\text{C}_{11}\text{H}_{23}\text{O}$  [ $\text{M}+\text{H}^+$ ]: 171.1749. Found: 171.1741

### 1-Cyclohexylbut-3-en-1-ol

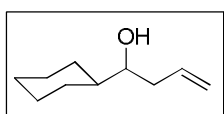

Colorless oil (91% yield);  $R_f = 0.53$  (3:1 hexane/ethyl acetate)

$^1\text{H NMR}$  (400 MHz,  $\text{CDCl}_3$ ):  $\delta$  5.79-5.89 (m, 1H), 5.12-5.16 (m, 2H), 3.37-3.42 (m, 1H), 2.30-2.36 (m, 1H), 2.09-2.17 (m, 1H), 1.67-1.88 (m, 5H), 1.60 (brs., 1H), 0.97-1.41 (m, 6H)

$^{13}\text{C NMR}$  (100 MHz,  $\text{CDCl}_3$ ):  $\delta$  135.5, 117.9, 74.7, 43.0, 38.8, 29.1, 28.1, 26.5, 26.3, 26.1

FTIR (neat): 3451, 1265  $\text{cm}^{-1}$

HRMS Calcd. for  $\text{C}_{10}\text{H}_{19}\text{O}$  [ $\text{M}+\text{H}^+$ ]: 155.1436. Found: 155.1436

## 2. Protection of Homoallylic Alcohols

### General Procedure for Protection Reactions of Homoallylic Alcohols

Representative procedure for protection reactions of homoallylic alcohols:

Preparation of *tert*-butyldiphenyl((1-phenylbut-3-en-1-yl)oxy)silane

The solution of 1-phenylhex-5-en-3-ol (2.24 g, 13 mmol), imidazole (1.78 g, 26 mmol) and DMAP (32 mg, 0.26 mmol) in anhydrous DMF (20 mL) was stirred for 10 min. *tert*-Butyldiphenylsilyl chloride (5.38 g, 20 mmol) was added and the reaction mixture was stirred for 12 h at room temperature. The reaction mixture was quenched with  $\text{H}_2\text{O}$  (45 mL) and extracted with ethyl acetate, washed with brine, dried over  $\text{MgSO}_4$ , filtered and concentrated *in vacuo*. The crude product was purified *via* silica gel chromatography to afford *tert*-butyldiphenyl((1-phenylbut-3-en-1-yl)oxy)-silane as colorless oil (88% yield).

Characterization of the protected homoallylic alcohols:

### *tert*-Butyldiphenyl((1-phenylbut-3-en-1-yl)oxy)silane

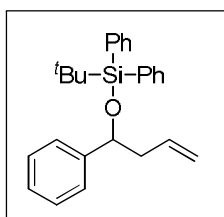

Colorless oil (87% yield);  $R_f = 0.76$  (7:1 hexane/diethyl ether)

$^1\text{H NMR}$  (400 MHz,  $\text{CDCl}_3$ ):  $\delta$  7.70 (d,  $J = 7.6$ , 2H), 7.31-7.46 (m, 6H), 7.18-7.24 (m, 7H), 5.48-5.58 (m, 1H), 4.78-4.87 (m, 2H), 4.70 (t,  $J = 6.4$ , 1H), 2.35-2.48 (m, 2H), 1.04 (s, 9H)

$^{13}\text{C NMR}$  (100 MHz,  $\text{CDCl}_3$ ):  $\delta$  144.0, 135.94, 135.91, 134.3, 134.2, 133.6, 129.6, 129.4, 127.8, 127.5, 127.3, 126.9, 126.3, 117.2, 75.5, 44.7, 27.0, 19.3

FTIR (neat): 3053, 1427, 1265  $\text{cm}^{-1}$

HRMS Calcd. for  $\text{C}_{26}\text{H}_{31}\text{OSi}$  [ $\text{M}+\text{H}^+$ ]: 387.2144. Found: 387.2148

***tert*-Butyldiphenyl((1-(*p*-tolyl)but-3-en-1-yl)oxy)silane**

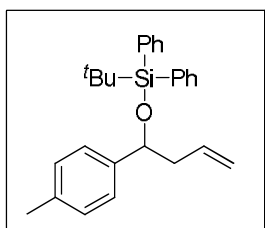

Colorless oil (91% yield);  $R_f = 0.77$  (7:1 hexane/diethyl ether)

$^1\text{H NMR}$  (400 MHz,  $\text{CDCl}_3$ ):  $\delta$  7.70 (d,  $J = 7.6$ , 2H), 7.46 (d,  $J = 7.6$ , 2H), 7.30-7.43 (m, 4H), 7.19-7.24 (m, 2H), 7.10 (d,  $J = 8.0$ , 2H), 7.04 (d,  $J = 8.0$ , 2H), 5.47-5.58 (m, 1H), 4.78-4.86 (m, 2H), 4.68 (t,  $J = 6.0$ , 1H), 2.33-2.46 (m, 2H), 2.30 (s, 3H), 1.04 (s, 9H)

$^{13}\text{C NMR}$  (100 MHz,  $\text{CDCl}_3$ ):  $\delta$  141.1, 136.4, 135.9, 134.4, 134.4, 133.7, 129.6, 129.4, 128.5, 127.5, 127.3, 126.2, 117.0, 75.4, 44.7, 27.0, 21.4, 19.4

FTIR (neat): 3051, 1427, 1265  $\text{cm}^{-1}$

HRMS Calcd. for  $\text{C}_{27}\text{H}_{33}\text{OSi}$  [ $\text{M}+\text{H}^+$ ]: 401.2301. Found: 401.2310

***tert*-Butyl((1-(4-ethylphenyl)but-3-en-1-yl)oxy)diphenylsilane**

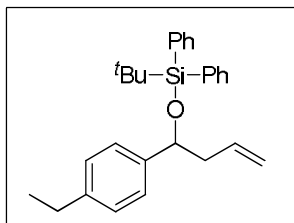

Colorless oil (48% yield);  $R_f = 0.79$  (7:1 hexane/diethyl ether)

$^1\text{H NMR}$  (400 MHz,  $\text{CDCl}_3$ ):  $\delta$  7.69 (d,  $J = 6.8$ , 2H), 7.30-7.45 (m, 6H), 7.20-7.24 (m, 2H), 7.11 (d,  $J = 8.0$ , 2H), 7.05 (d,  $J = 8.0$ , 2H), 5.49-5.60 (m, 1H), 4.80-4.87 (m, 2H), 4.67 (t,  $J = 6.0$ , 1H), 2.61 (q,  $J = 7.6$ , 2H), 2.34-2.48 (m, 2H), 1.22 (t,  $J = 7.6$ , 3H), 1.04 (s, 9H)

$^{13}\text{C NMR}$  (100 MHz,  $\text{CDCl}_3$ ):  $\delta$  142.8, 141.3, 136.0, 135.9, 134.5, 134.4, 133.8, 129.5, 129.3, 127.4, 127.3, 127.2, 126.3, 117.0, 75.4, 44.7, 28.5, 27.0, 19.4, 15.6

FTIR (neat): 3051, 1427, 1265  $\text{cm}^{-1}$

HRMS Calcd. for  $\text{C}_{28}\text{H}_{35}\text{OSi}$  [ $\text{M}+\text{H}^+$ ]: 415.2457. Found: 415.2469

***tert*-Butyl((1-mesitylbut-3-en-1-yl)oxy)diphenylsilane**

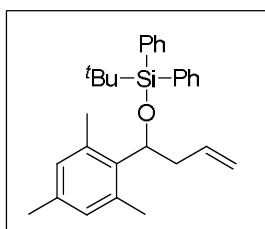

Colorless oil (42% yield);  $R_f = 0.78$  (7:1 hexane/diethyl ether)

$^1\text{H NMR}$  (400 MHz,  $\text{CDCl}_3$ ):  $\delta$  7.71 (d,  $J = 6.8$ , 2H), 7.30-7.44 (m, 6H), 7.18-7.21 (m, 2H), 6.82 (s, 1H), 6.60 (s, 1H), 5.32-5.40 (m, 1H), 5.01 (t,  $J = 7.2$ , 1H), 4.75-4.81 (m, 2H), 2.66 (s, 3H), 2.52-2.63 (m, 2H), 2.22 (s, 3H), 1.73 (s, 3H), 1.02 (s, 9H)

$^{13}\text{C NMR}$  (100 MHz,  $\text{CDCl}_3$ ):  $\delta$  137.1, 136.2, 136.05, 135.96, 135.89, 134.98, 134.94, 134.3, 133.6, 131.0, 129.6, 129.4, 128.4, 127.5, 127.2, 116.7, 72.2, 41.9, 27.0, 20.82, 20.79, 20.4, 19.3

FTIR (neat): 3051, 1636, 1427, 1265  $\text{cm}^{-1}$

HRMS Calcd. for  $\text{C}_{29}\text{H}_{37}\text{OSi}$  [ $\text{M}+\text{H}^+$ ]: 429.2614. Found: 429.2621

***tert*-Butyl((1-(4-methoxyphenyl)but-3-en-1-yl)oxy)diphenylsilane**

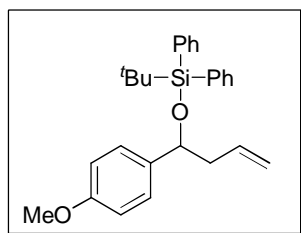

Colorless oil (69% yield);  $R_f = 0.74$  (7:1 hexane/diethyl ether)

$^1\text{H NMR}$  (400 MHz,  $\text{CDCl}_3$ ):  $\delta$  7.69 (d,  $J = 7.6$ , 2H), 7.32-7.46 (m, 6H), 7.21-7.25 (m, 2H), 7.11 (d,  $J = 8.4$ , 2H), 6.77 (d,  $J = 8.4$ , 2H), 5.48-5.58 (m, 1H), 4.79-4.87 (m, 2H), 4.65 (t,  $J = 6.4$ , 1H), 3.78 (s, 3H), 2.34-2.47 (m, 2H), 1.03 (s, 9H)

$^{13}\text{C NMR}$  (100 MHz,  $\text{CDCl}_3$ ):  $\delta$  158.5, 136.4, 135.93, 135.91, 134.4, 134.36, 133.7, 129.5, 129.4, 127.5, 127.3, 117.0, 113.2, 75.1, 55.2, 44.7, 27.0, 19.3

FTIR (neat): 3071, 3049, 1427  $\text{cm}^{-1}$

HRMS Calcd. for  $\text{C}_{27}\text{H}_{33}\text{O}_2\text{Si}$  [ $\text{M}+\text{H}^+$ ]: 417.2250. Found: 417.2270

***tert*-Butyl((1-(2-methoxyphenyl)but-3-en-1-yl)oxy)diphenylsilane**

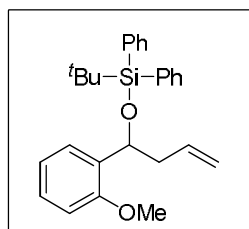

Colorless oil (53% yield);  $R_f = 0.75$  (7:1 hexane/diethyl ether)

$^1\text{H NMR}$  (400 MHz,  $\text{CDCl}_3$ ):  $\delta$  7.70 (d,  $J = 7.6$ , 2H), 7.58 (d,  $J = 7.6$ , 1H), 7.30-7.47 (m, 6H), 7.14-7.23 (m, 3H), 6.93 (t,  $J = 7.6$ , 1H), 6.68 (d,  $J = 8.4$ , 1H), 5.60-5.71 (m, 1H), 5.28 (t,  $J = 5.6$ , 1H), 4.81-4.88 (m, 2H), 3.57 (s, 3H), 2.33-2.46 (m, 2H), 1.05 (s, 9H)

$^{13}\text{C NMR}$  (100 MHz,  $\text{CDCl}_3$ ):  $\delta$  155.4, 134.0, 135.9, 134.7, 134.5, 134.0, 132.6, 129.4, 129.2, 127.6, 127.5, 127.4, 127.1, 120.2, 116.6, 109.8, 68.5, 55.0, 44.8, 27.0, 19.4

FTIR (neat): 3051, 1265  $\text{cm}^{-1}$

HRMS Calcd. for  $\text{C}_{27}\text{H}_{33}\text{O}_2\text{Si}$  [ $\text{M}+\text{H}^+$ ]: 417.2250. Found: 417.2253

***tert*-Butyl((1-(4-fluorophenyl)but-3-en-1-yl)oxy)diphenylsilane**

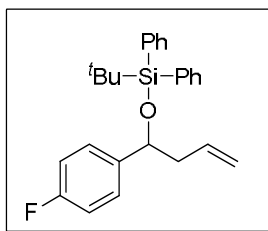

Colorless oil (83% yield);  $R_f = 0.71$  (7:1 hexane/diethyl ether)

$^1\text{H NMR}$  (400 MHz,  $\text{CDCl}_3$ ):  $\delta$  7.68 (d,  $J = 7.6$ , 2H), 7.31-7.45 (m, 6H), 7.23 (t,  $J = 7.6$ , 2H), 7.14 (dd,  $J_1 = 8.4$ ,  $J_2 = 5.6$ , 2H), 6.90 (t,  $J = 8.8$ , 2H), 5.47-5.58 (m, 1H), 4.87 (d,  $J = 10$ , 1H), 4.81 (d,  $J = 17$ , 1H), 4.68 (t,  $J = 6.0$ , 1H), 2.33-2.47 (m, 2H), 1.04 (s, 9H)

$^{13}\text{C NMR}$  (100 MHz,  $\text{CDCl}_3$ ):  $\delta$  161.8 (d,  $J = 243.0$ ), 139.8 (d,  $J = 3.0$ ), 135.9, 135.8, 134.1, 133.9, 133.5, 129.7, 129.5, 127.8 (d,  $J = 8.0$ ), 127.5, 127.4, 117.4, 114.6 (d,  $J = 22.0$ ), 74.9, 44.7, 27.0, 19.3

FTIR (neat): 3053, 1636, 1265  $\text{cm}^{-1}$

HRMS Calcd. for  $\text{C}_{26}\text{H}_{30}\text{FOSi}$  [ $\text{M}+\text{H}^+$ ]: 405.2050. Found: 405.2048

#### ***tert*-Butyldiphenyl((1-phenylhex-5-en-3-yl)oxy)silane**

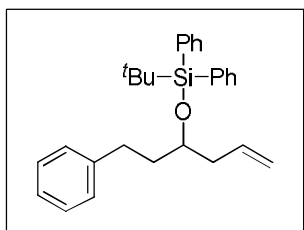

Colorless oil (95% yield);  $R_f = 0.76$  (7:1 hexane/diethyl ether)

$^1\text{H NMR}$  (400 MHz,  $\text{CDCl}_3$ ):  $\delta$  7.67-7.70 (m, 4H), 7.34-7.43 (m, 6H), 7.20 (t,  $J = 7.2$ , 2H), 7.12 (t,  $J = 7.2$ , 1H), 7.01 (d,  $J = 7.2$ , 2H), 5.69-5.80 (m, 1H), 4.93-5.00 (m, 2H), 3.81-3.87 (m, 1H), 2.52-2.61 (m, 2H), 2.24-2.30 (m, 2H), 1.72-1.77 (m, 2H), 1.08 (s, 9H)

$^{13}\text{C NMR}$  (100 MHz,  $\text{CDCl}_3$ ):  $\delta$  142.4, 135.96, 135.93, 134.7, 134.44, 134.37, 129.56, 129.53, 128.27, 128.24, 127.53, 127.48, 125.5, 117.0, 72.4, 41.0, 37.8, 31.3, 27.1, 19.4

FTIR (neat): 3053, 1265  $\text{cm}^{-1}$

HRMS Calcd. for  $\text{C}_{28}\text{H}_{35}\text{OSi}$  [ $\text{M}+\text{H}^+$ ]: 415.2457. Found: 415.2455

#### ***tert*-Butyldiphenyl(undec-1-en-4-yloxy)silane**

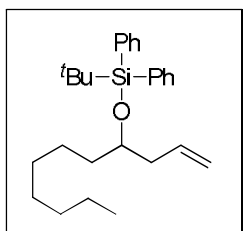

Colorless oil (84% yield);  $R_f = 0.78$  (7:1 hexane/diethyl ether)

$^1\text{H NMR}$  (400 MHz,  $\text{CDCl}_3$ ):  $\delta$  7.67 (d,  $J = 7.6$ , 4H), 7.33-7.42 (m, 6H), 5.69-5.79 (m, 1H), 4.90-4.96 (m, 2H), 3.73-3.79 (m, 1H), 2.12-2.26 (m, 2H), 1.36-1.46 (m, 2H), 1.10-1.26 (m, 11H), 1.06 (s, 9H), 0.86 (t,  $J = 6.4$ , 3H)

$^{13}\text{C NMR}$  (100 MHz,  $\text{CDCl}_3$ ):  $\delta$  135.96, 135.94, 135.1, 134.63, 134.60, 129.4, 127.4, 116.6, 72.8, 41.0, 36.0, 31.8, 29.6, 29.2, 27.1, 24.8, 22.6, 19.4, 14.1

FTIR (neat): 3051, 1639, 1263  $\text{cm}^{-1}$

HRMS Calcd. for  $C_{27}H_{41}OSi$  [ $M+H^+$ ]: 409.2927. Found: 409.2924

### ***tert*-Butyl((1-cyclohexylbut-3-en-1-yl)oxy)diphenylsilane**

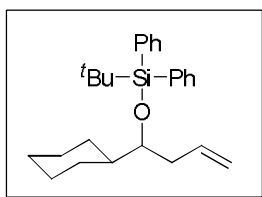

Colorless oil (83% yield);  $R_f = 0.76$  (7:1 hexane/diethyl ether)

$^1H$  NMR (400 MHz,  $CDCl_3$ ):  $\delta$  7.67-7.70 (m, 4H), 7.34-7.43 (m, 6H), 5.58-5.68 (m, 1H), 4.82-4.89 (m, 2H), 3.57 (dd,  $J_1 = 10.0$ ,  $J_2 = 6.0$ , 1H), 2.08-2.24 (m, 2H), 1.56-1.69 (m, 5H), 1.08-1.37 (m, 6H), 1.06 (s, 9H)

$^{13}C$  NMR (100 MHz,  $CDCl_3$ ):  $\delta$  136.1, 135.7, 134.8, 134.4, 129.44, 129.36, 127.4, 127.3, 116.3, 77.3, 42.4, 38.3, 29.1, 27.4, 27.2, 26.8, 26.51, 26.46, 19.6

FTIR (neat): 3071, 3049, 1471, 1449, 1427  $cm^{-1}$

HRMS Calcd. for  $C_{26}H_{37}OSi$  [ $M+H^+$ ]: 393.2614. Found: 393.2613

### **(3-(Benzyloxy)hex-5-en-1-yl)benzene**

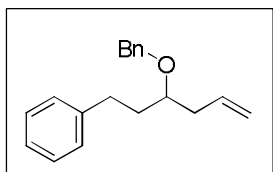

1-Phenylhex-5-en-3-ol (3.40 g, 19.3 mmol) was dissolved in DMF (100 mL) and cooled to 0°C. Sodium hydride (2.32 g, 57.9 mmol, 60%) was added in one portion and stirred for 30 minutes, followed by addition dropwise of benzyl bromide (2.97 g, 17.4 mmol). The solution was allowed to warm to room temperature and stirred over night under  $N_2$ . The reaction was quenched with a saturated ammonium chloride solution and diluted with ether. The organic phase was separated, washed three times with water then brine and dried over sodium sulfate. The solution was concentrated *in vacuo* and purified *via* silica gel chromatography to afford the desired compound.<sup>2</sup>

Colorless oil (71% yield);  $R_f = 0.72$  (7:1 hexane/diethyl ether)

$^1H$  NMR (400 MHz,  $CDCl_3$ ):  $\delta$  7.32-7.37 (m, 4H), 7.25-7.30 (m, 3H), 7.15-7.19 (m, 3H), 5.79-5.90 (m, 1H), 5.05-5.12 (m, 2H), 4.60 (d,  $J = 11.6$ , 1H), 4.48 (d,  $J = 11.6$ , 1H), 3.45-3.52 (m, 1H), 2.75-2.82 (m, 1H), 2.60-2.68 (m, 1H), 2.32-2.43 (m, 2H), 1.78-1.93 (m, 2H)

$^{13}C$  NMR (100 MHz,  $CDCl_3$ ):  $\delta$  142.3, 138.8, 134.7, 128.41, 128.36, 128.33, 127.8, 127.5, 125.7, 117.1, 77.8, 70.9, 38.2, 35.7, 31.7

FTIR (neat): 3053, 1636, 1265  $cm^{-1}$

HRMS Calcd. for  $C_{19}H_{23}O$  [ $M+H^+$ ]: 267.1749. Found: 267.1749

### **1-Phenylhex-5-en-3-yl acetate**

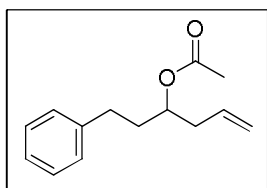

1-Phenylhex-5-en-3-ol (2.90 g, 16.4 mmol) was dissolved in DCM (30 mL).  $Et_3N$  (2.49 g, 24.6

<sup>2</sup> K. M. McQuaid and D. Sames, *J. Am. Chem. Soc.* 2009, **131**, 402.

mmol) and DMAP (40 mg, 0.33 mmol) were added and stirred for 10 minutes, followed by addition dropwise of acetyl chloride (1.93 g, 24.6 mmol). The solution was stirred over night at room temperature under N<sub>2</sub>. The reaction was quenched with a saturated sodium hydrogencarbonate solution. The organic phase was separated, washed three times with water then brine and dried over sodium sulfate. The solution was concentrated *in vacuo* and purified *via* silica gel chromatography to afford the desired compound.

Colorless oil (59% yield); R<sub>f</sub> = 0.53 (7:1 hexane/diethyl ether)

<sup>1</sup>H NMR (400 MHz, CDCl<sub>3</sub>): δ 7.15-7.29 (m, 5H), 5.70-5.80 (m, 1H), 5.05-5.10 (m, 2H), 4.94-5.00 (m, 1H), 2.58-2.71 (m, 2H), 2.34 (t, *J* = 6.4, 2H), 2.03 (s, 3H), 1.86-1.95 (m, 2H)

<sup>13</sup>C NMR (100 MHz, CDCl<sub>3</sub>): δ 170.7, 141.5, 133.5, 128.4, 128.3, 125.9, 117.8, 72.8, 38.7, 35.2, 31.7, 21.1

FTIR (neat): 1732 cm<sup>-1</sup>

HRMS Calcd. for C<sub>14</sub>H<sub>19</sub>O<sub>2</sub> [M+H<sup>+</sup>]: 219.1385. Found: 219.1394

### 1-Phenylhex-5-en-3-yl benzoate

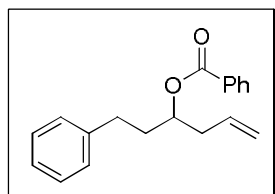

1-Phenylhex-5-en-3-ol (2.99 g, 17.0 mmol) was dissolved in DCM (30 mL). Et<sub>3</sub>N (2.58 g, 25.5 mmol) and DMAP (42 mg, 0.34 mmol) were added and stirred for 10 minutes, followed by addition dropwise of benzoyl chloride (3.58 g, 25.5 mmol). The solution was stirred over night at room temperature under N<sub>2</sub>. The reaction was quenched with a saturated sodium hydrogencarbonate solution. The organic phase was separated, washed three times with water then brine and dried over sodium sulfate. The solution was concentrated *in vacuo* and purified *via* silica gel chromatography to afford the desired compound.

Colorless oil (71% yield); R<sub>f</sub> = 0.57 (7:1 hexane/diethyl ether)

<sup>1</sup>H NMR (400 MHz, CDCl<sub>3</sub>): δ 8.05 (d, *J* = 7.6, 2H), 7.55 (t, *J* = 7.6, 1H), 7.44 (t, *J* = 7.6, 2H), 7.23-7.28 (m, 2H), 7.14-7.18 (m, 3H), 5.77-5.86 (m, 1H), 5.21-5.24 (m, 1H), 5.06-5.13 (m, 2H), 2.68-2.75 (m, 2H), 2.47 (t, *J* = 7.6, 2H), 1.98-2.07 (m, 2H)

<sup>13</sup>C NMR (100 MHz, CDCl<sub>3</sub>): δ 166.1, 141.5, 133.4, 132.8, 130.5, 129.5, 128.4, 128.3, 125.9, 118.0, 73.5, 38.7, 35.4, 31.7

FTIR (neat): 1713 cm<sup>-1</sup>

HRMS Calcd. for C<sub>19</sub>H<sub>21</sub>O<sub>2</sub> [M+H<sup>+</sup>]: 281.1542. Found: 281.1547

## 3. Preparation of Primary Alcohols *via* Brown Hydroboration Reaction

### General Procedure for Primary Alcohols

Representative procedure for primary alcohols:

#### Preparation of 4-((*tert*-Butyldiphenylsilyloxy)-6-phenylhexan-1-ol

To a 0.5 M solution (78.6 mL, 39.3 mmol) of 9-BBN in THF was added dropwise a solution of *tert*-butyldiphenyl((1-phenylhex-5-en-3-yl)oxy)silane (5.43 g, 13.1 mmol) in THF (50 mL) over 10 min, and the mixture was heated under reflux for 2 h. After cooling, the reaction mixture was treated with EtOH (30 mL), 2N aqueous NaOH (15 mL), and 30% aqueous H<sub>2</sub>O<sub>2</sub> (15 mL) at 50 °C for 1 h. The aqueous layer was saturated with K<sub>2</sub>CO<sub>3</sub>, separated from the organic layer, and

extracted with ether. The combined organic layers were washed with brine, dried over anhydrous  $\text{MgSO}_4$ , and concentrated. Purification of the residue by silica gel chromatography provided the desired compound.<sup>3</sup>

#### Characterization of Primary Alcohols:

##### 4-((*tert*-Butyldiphenylsilyl)oxy)-4-phenylbutan-1-ol

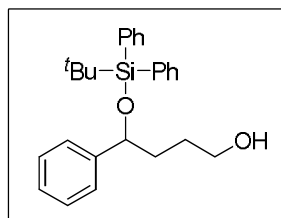

Colorless oil (71% yield);  $R_f = 0.26$  (3:1 hexane/ethyl acetate)

$^1\text{H NMR}$  (400 MHz,  $\text{CDCl}_3$ ):  $\delta$  7.74 (dd,  $J_1 = 8.0$ ,  $J_2 = 1.6$ , 2H), 7.31-7.46 (m, 6H), 7.17-7.26 (m, 7H), 4.72 (t,  $J = 6.0$ , 1H), 3.38 (dd,  $J_1 = 6.4$ ,  $J_2 = 5.6$ , 2H), 1.62-1.77 (m, 2H), 1.30-1.38 (m, 2H), 1.23 (t,  $J = 5.6$ , 1H), 1.04 (s, 9H)

$^{13}\text{C NMR}$  (100 MHz,  $\text{CDCl}_3$ ):  $\delta$  144.2, 135.9, 135.8, 134.3, 133.5, 129.6, 129.4, 127.9, 127.5, 127.3, 126.9, 126.2, 75.3, 62.8, 36.1, 27.8, 27.0, 19.3

FTIR (neat):  $3333\text{ cm}^{-1}$

HRMS Calcd. for  $\text{C}_{26}\text{H}_{33}\text{O}_2\text{Si}$  [ $\text{M}+\text{H}^+$ ]: 405.2250. Found: 405.2245

##### 4-((*tert*-Butyldiphenylsilyl)oxy)-4-(*p*-tolyl)butan-1-ol

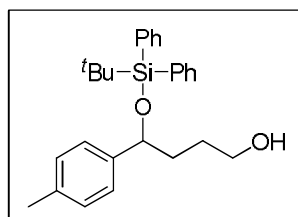

Colorless oil (75% yield);  $R_f = 0.30$  (3:1 hexane/ethyl acetate)

$^1\text{H NMR}$  (400 MHz,  $\text{CDCl}_3$ ):  $\delta$  7.69-7.71 (m, 2H), 7.32-7.47 (m, 6H), 7.21-7.25 (m, 2H), 7.11 (d,  $J = 8.0$ , 2H), 7.05 (d,  $J = 8.0$ , 2H), 4.69 (t,  $J = 6.0$ , 1H), 3.38 (t,  $J = 6.8$ , 2H), 2.31 (s, 3H), 1.60-1.72 (m, 2H), 1.29-1.37 (m, 2H), 1.31 (s, 1H), 1.03 (s, 9H)

$^{13}\text{C NMR}$  (100 MHz,  $\text{CDCl}_3$ ):  $\delta$  141.3, 136.4, 135.9, 135.8, 134.4, 133.6, 129.6, 129.4, 128.6, 127.5, 127.3, 126.1, 62.8, 36.1, 27.8, 27.0, 21.1, 19.3

FTIR (neat):  $3354\text{ cm}^{-1}$

HRMS Calcd. for  $\text{C}_{27}\text{H}_{35}\text{O}_2\text{Si}$  [ $\text{M}+\text{H}^+$ ]: 419.2406. Found: 419.2418

##### 4-((*tert*-Butyldiphenylsilyl)oxy)-4-(4-ethylphenyl)butan-1-ol

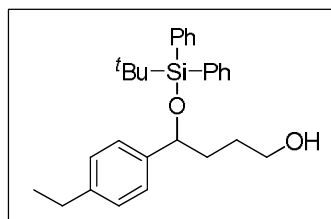

<sup>3</sup> M. Ohba, N. Kawase and T. Fujii, *J. Am. Chem. Soc.* 1996, **118**, 8250.



Colorless oil (78% yield);  $R_f = 0.30$  (3:1 hexane/ethyl acetate)

$^1\text{H NMR}$  (400 MHz,  $\text{CDCl}_3$ ):  $\delta$  7.69 (dd,  $J_1 = 8.0$ ,  $J_2 = 1.6$ , 2H), 7.31-7.45 (m, 6H), 7.22-7.24 (m, 2H), 7.12 (d,  $J = 8.0$ , 2H), 7.06 (d,  $J = 8.0$ , 2H), 4.70 (t,  $J = 6.0$ , 1H), 3.39 (brs., 2H), 2.61 (q,  $J = 7.6$ , 2H), 1.61-1.74 (m, 2H), 1.32-1.39 (m, 2H), 1.22 (t,  $J = 7.6$ , 3H), 1.15 (brs., 1H), 1.04 (s, 9H)

$^{13}\text{C NMR}$  (100 MHz,  $\text{CDCl}_3$ ):  $\delta$  142.8, 141.5, 135.91, 135.87, 134.4, 133.7, 129.6, 129.4, 127.5, 127.4, 127.3, 126.2, 62.9, 36.1, 27.8, 28.5, 27.9, 27.0, 19.3, 15.6

FTIR (neat):  $3450\text{ cm}^{-1}$

HRMS Calcd. for  $\text{C}_{28}\text{H}_{37}\text{O}_2\text{Si}$  [ $\text{M}+\text{H}^+$ ]: 433.2563. Found: 433.2568

#### 4-((*tert*-Butyldiphenylsilyl)oxy)-4-mesitylbutan-1-ol

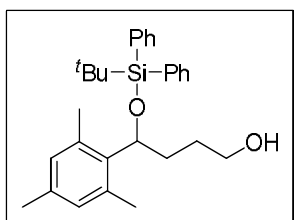

Colorless oil (77% yield);  $R_f = 0.28$  (3:1 hexane/ethyl acetate)

$^1\text{H NMR}$  (400 MHz,  $\text{CDCl}_3$ ):  $\delta$  7.71 (dd,  $J_1 = 8.0$ ,  $J_2 = 1.6$ , 2H), 7.32-7.46 (m, 6H), 7.21 (t,  $J = 7.6$ , 2H), 6.82 (s, 1H), 6.62 (s, 1H), 4.99 (t,  $J = 7.2$ , 1H), 3.33-3.37 (m, 2H), 2.65 (s, 3H), 2.23 (s, 3H), 1.80-1.95 (m, 2H), 1.78 (s, 3H), 1.31-1.42 (m, 1H), 1.06-1.16 (m, 1H), 1.00 (s, 9H), 0.95 (t,  $J = 5.6$ , 1H)

$^{13}\text{C NMR}$  (100 MHz,  $\text{CDCl}_3$ ):  $\delta$  137.1, 136.6, 136.0, 135.9, 134.8, 134.5, 133.6, 131.2, 129.6, 129.4, 128.5, 127.5, 127.3, 62.8, 33.4, 29.3, 27.0, 20.8, 20.75, 20.4, 19.3

FTIR (neat):  $3450\text{ cm}^{-1}$

HRMS Calcd. for  $\text{C}_{29}\text{H}_{39}\text{O}_2\text{Si}$  [ $\text{M}+\text{H}^+$ ]: 447.2719. Found: 447.2734

#### 4-((*tert*-Butyldiphenylsilyl)oxy)-4-(4-methoxyphenyl)butan-1-ol

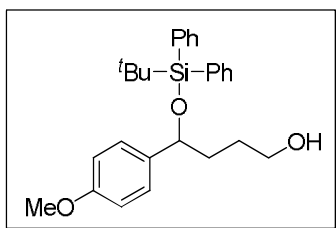

Colorless oil (69% yield);  $R_f = 0.23$  (3:1 hexane/ethyl acetate)

$^1\text{H NMR}$  (400 MHz,  $\text{CDCl}_3$ ):  $\delta$  7.68-7.70 (m, 2H), 7.32-7.46 (m, 6H), 7.23 (t,  $J = 7.6$ , 2H), 7.12 (d,  $J = 8.8$ , 2H), 6.78 (d,  $J = 8.8$ , 2H), 4.66 (t,  $J = 6.0$ , 1H), 3.78 (s, 3H), 3.40 (t,  $J = 6.8$ , 2H), 1.61-1.78 (m, 2H), 1.18-1.37 (m, 2H), 1.23 (br., 1H), 1.31 (s, 1H), 1.03 (s, 9H)

$^{13}\text{C NMR}$  (100 MHz,  $\text{CDCl}_3$ ):  $\delta$  158.5, 136.5, 135.9, 135.8, 134.4, 133.6, 129.6, 129.4, 127.5, 127.34, 127.29, 113.3, 75.0, 62.8, 55.2, 36.1, 27.9, 27.0, 19.3

FTIR (neat):  $3445\text{ cm}^{-1}$

HRMS Calcd. for  $\text{C}_{27}\text{H}_{35}\text{O}_3\text{Si}$  [ $\text{M}+\text{H}^+$ ]: 435.2355. Found: 435.2358

#### 4-((*tert*-Butyldiphenylsilyl)oxy)-4-(2-methoxyphenyl)butan-1-ol

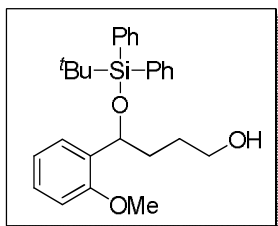

Colorless oil (77% yield);  $R_f = 0.26$  (3:1 hexane/ethyl acetate)

$^1\text{H NMR}$  (400 MHz,  $\text{CDCl}_3$ ):  $\delta$  7.69 (d,  $J = 8.0$ , 2H), 7.61 (d,  $J = 7.6$ , 1H), 7.29-7.46 (m, 6H), 7.13-7.22 (m, 3H), 6.94 (t,  $J = 7.6$ , 1H), 6.67 (d,  $J = 8.0$ , 1H), 5.27 (t,  $J = 5.6$ , 1H), 3.55 (s, 3H), 3.40 (t,  $J = 6.8$ , 2H), 1.59-1.79 (m, 2H), 1.32-1.49 (m, 3H), 1.05 (s, 9H)

$^{13}\text{C NMR}$  (100 MHz,  $\text{CDCl}_3$ ):  $\delta$  155.3, 135.8, 134.4, 133.77, 133.75, 129.5, 129.2, 127.6, 127.41, 127.37, 127.1, 120.3, 109.9, 68.3, 63.0, 55.0, 34.5, 27.5, 27.0, 19.3

FTIR (neat): 3447  $\text{cm}^{-1}$

HRMS Calcd. for  $\text{C}_{27}\text{H}_{35}\text{O}_3\text{Si}$  [ $\text{M}+\text{H}^+$ ]: 435.2355. Found: 435.2355

#### 4-((tert-Butyldiphenylsilyloxy)-4-(4-fluorophenyl)butan-1-ol

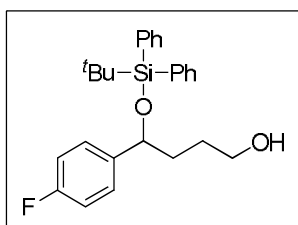

Colorless oil (66% yield);  $R_f = 0.23$  (3:1 hexane/ethyl acetate)

$^1\text{H NMR}$  (400 MHz,  $\text{CDCl}_3$ ):  $\delta$  7.68 (dd,  $J_1 = 8.0$ ,  $J_2 = 1.2$ , 2H), 7.32-7.44 (m, 6H), 7.23 (t,  $J = 7.6$ , 2H), 7.14-7.17 (m, 2H), 6.89-6.93 (m, 2H), 4.69 (t,  $J = 6.0$ , 1H), 3.41 (t,  $J = 6.8$ , 2H), 1.62-1.79 (m, 2H), 1.30-1.38 (m, 2H), 1.24 (br., 1H), 1.04 (s, 9H)

$^{13}\text{C NMR}$  (100 MHz,  $\text{CDCl}_3$ ):  $\delta$  161.8 (d,  $J = 243.0$ ), 140.1 (d,  $J = 3.0$ ), 135.8, 134.1, 133.4, 129.7, 129.5, 127.8 (d,  $J = 8.0$ ), 127.6, 127.4, 114.6 (d,  $J = 21.0$ ), 74.8, 62.7, 36.2, 27.79, 27.97, 19.3

FTIR (neat): 3443  $\text{cm}^{-1}$

HRMS Calcd. for  $\text{C}_{26}\text{H}_{32}\text{FO}_2\text{Si}$  [ $\text{M}+\text{H}^+$ ]: 423.2156. Found: 423.2150

#### 4-((tert-Butyldiphenylsilyloxy)-6-phenylhexan-1-ol

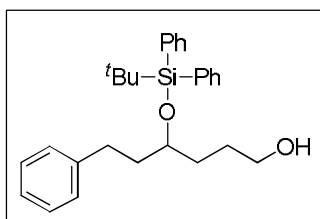

Colorless oil (68% yield);  $R_f = 0.25$  (3:1 hexane/ethyl acetate)

$^1\text{H NMR}$  (400 MHz,  $\text{CDCl}_3$ ):  $\delta$  7.67-7.69 (m, 4H), 7.35-7.44 (m, 6H), 7.11-7.23 (m, 3H), 6.99 (d,  $J = 7.2$ , 2H), 3.83-3.85 (m, 1H), 3.48 (brs., 2H), 2.49-2.57 (m, 2H), 1.72-1.82 (m, 2H), 1.51-1.61 (m, 4H), 1.46 (brs., 1H), 1.07 (s, 9H)

$^{13}\text{C NMR}$  (100 MHz,  $\text{CDCl}_3$ ):  $\delta$  142.2, 135.9, 134.31, 134.28, 129.6, 128.24, 128.21, 127.5, 125.6, 72.5, 63.0, 37.8, 32.3, 31.4, 27.9, 27.1, 19.4

FTIR (neat): 3445  $\text{cm}^{-1}$

HRMS Calcd. for  $C_{28}H_{37}O_2Si$  [ $M+H^+$ ]: 433.2567. Found: 433.2567

**4-((*tert*-Butyldiphenylsilyl)oxy)undecan-1-ol**

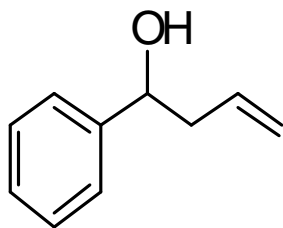

Colorless oil (68% yield);  $R_f = 0.22$  (3:1 hexane/ethyl acetate)

$^1H$  NMR (400 MHz,  $CDCl_3$ ):  $\delta$  7.68 (d,  $J = 7.6$ , 4H), 7.35-7.44 (m, 6H), 3.75-3.79 (m, 1H), 3.49-3.51 (m, 2H), 1.36-1.56 (m, 7H), 1.09-1.29 (m, 10H), 1.06 (s, 9H), 0.86 (t,  $J = 7.2$ , 3H)

$^{13}C$  NMR (100 MHz,  $CDCl_3$ ):  $\delta$  135.9, 134.49, 134.46, 129.51, 129.49, 127.46, 127.43, 72.9, 63.1, 36.0, 32.3, 31.8, 29.5, 29.2, 27.8, 27.1, 25.0, 22.6, 19.4, 14.1

FTIR (neat):  $3443\text{ cm}^{-1}$

HRMS Calcd. for  $C_{27}H_{43}O_2Si$  [ $M+H^+$ ]: 427.3032. Found: 427.3032

**4-((*tert*-Butyldiphenylsilyl)oxy)-4-cyclohexylbutan-1-ol**

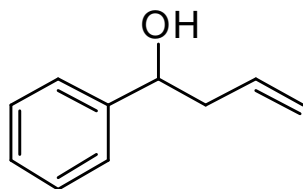

Colorless oil (68% yield);  $R_f = 0.21$  (3:1 hexane/ethyl acetate)

$^1H$  NMR (400 MHz,  $CDCl_3$ ):  $\delta$  7.67-7.69 (m, 4H), 7.34-7.43 (m, 6H), 3.53-3.57 (m, 1H), 3.33-3.37 (m, 2H), 1.59-1.70 (m, 6H), 1.37-1.44 (m, 5H), 1.11 (brs., 5H), 1.06 (s, 9H)

$^{13}C$  NMR (100 MHz,  $CDCl_3$ ):  $\delta$  136.04, 136.01, 134.9, 134.5, 129.46, 129.41, 127.39, 127.36, 77.4, 63.0, 42.8, 29.4, 28.7, 28.6, 28.2, 27.2, 26.7, 26.5, 19.6

FTIR (neat):  $3443\text{ cm}^{-1}$

HRMS Calcd. for  $C_{26}H_{39}O_2Si$  [ $M+H^+$ ]: 411.2719. Found: 411.2715

**4-(Benzyloxy)-6-phenylhexan-1-ol**

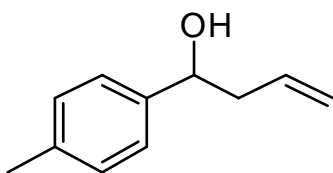

Colorless oil (68% yield);  $R_f = 0.20$  (3:1 hexane/ethyl acetate)

$^1H$  NMR (400 MHz,  $CDCl_3$ ):  $\delta$  7.16-7.35 (m, 10H), 4.52 (s, 2H), 3.59-3.49 (m, 2H), 3.45-3.49 (m, 1H), 2.62-2.77 (m, 2H), 1.79-1.99 (m, 3H), 1.63-1.72 (m, 4H)

$^{13}C$  NMR (100 MHz,  $CDCl_3$ ):  $\delta$  142.2, 138.5, 128.38, 128.35, 127.9, 127.6, 125.8, 70.8, 62.9, 35.4, 31.6, 30.1, 28.4

FTIR (neat):  $3441\text{ cm}^{-1}$

HRMS Calcd. for  $C_{19}H_{25}O_2$  [ $M+H^+$ ]: 285.1855. Found: 285.1856

**6-Hydroxy-1-phenylhexan-3-yl acetate**

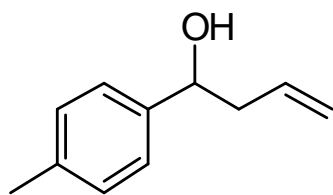

Colorless oil (65% yield);  $R_f = 0.23$  (3:1 hexane/ethyl acetate)

$^1\text{H NMR}$  (400 MHz,  $\text{CDCl}_3$ ):  $\delta$  7.16-7.30 (m, 5H), 4.93-4.99 (m, 1H), 3.63-3.66 (m, 2H), 2.57-2.71 (m, 2H), 2.04 (s, 3H), 1.81-1.96 (m, 2H), 1.65-1.70 (m, 2H), 1.54-1.60 (m, 3H)

$^{13}\text{C NMR}$  (100 MHz,  $\text{CDCl}_3$ ):  $\delta$  171.0, 141.5, 128.4, 128.2, 125.8, 73.6, 62.4, 35.8, 31.7, 30.4, 28.3, 21.1

FTIR (neat): 3443, 1728  $\text{cm}^{-1}$

HRMS Calcd. for  $\text{C}_{14}\text{H}_{21}\text{O}_3$  [ $\text{M}+\text{H}^+$ ]: 237.1491. Found: 237.1487

#### 6-Hydroxy-1-phenylhexan-3-yl benzoate

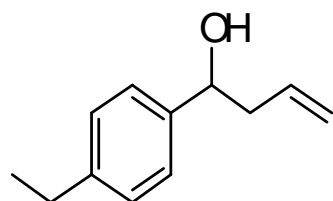

Colorless oil (60% yield);  $R_f = 0.27$  (3:1 hexane/ethyl acetate)

$^1\text{H NMR}$  (400 MHz,  $\text{CDCl}_3$ ):  $\delta$  8.04 (d,  $J = 8.0$ , 2H), 7.54 (t,  $J = 7.6$ , 1H), 7.42 (t,  $J = 7.6$ , 2H), 7.13-7.27 (m, 5H), 5.18-5.24 (m, 1H), 3.63 (t,  $J = 6.4$ , 2H), 2.63-2.77 (m, 2H), 2.17 (br., 1H), 1.93-2.11 (m, 2H), 1.77-1.82 (m, 2H), 1.60-1.66 (m, 2H)

$^{13}\text{C NMR}$  (100 MHz,  $\text{CDCl}_3$ ):  $\delta$  166.4, 141.4, 132.8, 130.4, 129.5, 128.34, 128.29, 128.2, 125.8, 74.2, 62.3, 35.9, 31.7, 30.6, 28.3

FTIR (neat): 3447, 1713  $\text{cm}^{-1}$

HRMS Calcd. for  $\text{C}_{19}\text{H}_{23}\text{O}_3$  [ $\text{M}+\text{H}^+$ ]: 299.1647. Found: 299.1646

#### 4. Preparation of $\gamma$ -Protected Hydroxyl Aldehydes *via* Swern Oxidation

##### General Procedure for Swern Oxidation of Primary Alcohols

Representative procedure for Preparation of  $\gamma$ -protected hydroxyl aldehydes:

##### Preparation of 4-((*tert*-butyldiphenylsilyloxy)-6-phenylhexanal:

To a solution of oxalyl dichloride (0.74 mL, 8.5 mmol) in DCM (20 mL) cooled to  $-78^\circ\text{C}$  was added dropwise a solution of DMSO (0.65 mL, 9.2 mmol) in DCM (5.0 mL) and stirred for 10 min. A solution of 4-((*tert*-butyldiphenylsilyloxy)-6-phenylhexan-1-ol (3.06 g, 7.1 mmol) in DCM (5.0 mL) was added dropwise and stirred for 30 min at  $-78^\circ\text{C}$ .  $\text{Et}_3\text{N}$  (4.95 mL, 35 mmol) was added in one portion and kept for 20 min then warmed to room temperature for 2h. The reaction mixture was washed with saturated  $\text{NH}_4\text{Cl}$ , dried over  $\text{MgSO}_4$ , filtered and concentrated *in vacuo*. The crude product was purified *via* silica gel chromatography to afford the desired compound.

Characterization of the  $\gamma$ -protected hydroxyl aldehydes (materials for **1b**, **1c** and **1d**):

##### 4-(Benzyloxy)-6-phenylhexanal

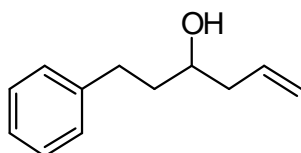

Colorless oil (71% yield);  $R_f = 0.33$  (7:1 hexane/diethyl ether)

$^1\text{H NMR}$  (400 MHz,  $\text{CDCl}_3$ ):  $\delta$  9.75 (t,  $J = 1.6$ , 1H), 7.15-7.35 (m, 10H), 4.43-2.52 (m, 2H), 3.43-3.49 (m, 1H), 2.63-2.76 (m, 2H), 2.52 (td,  $J_1 = 7.2$ ,  $J_2 = 1.6$ , 2H), 1.78-2.01 (m, 4H)

$^{13}\text{C NMR}$  (100 MHz,  $\text{CDCl}_3$ ):  $\delta$  202.2, 142.0, 138.4, 128.40, 128.33, 127.9, 127.7, 125.9, 77.1, 70.9, 39.8, 35.5, 31.5, 26.1

FTIR (neat):  $1722\text{ cm}^{-1}$

HRMS Calcd. for  $\text{C}_{19}\text{H}_{23}\text{O}_2$  [ $\text{M}+\text{H}^+$ ]: 283.1698. Found: 283.1695

#### 6-Oxo-1-phenylhexan-3-yl acetate

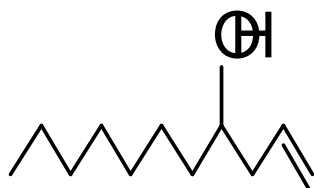

Colorless oil (82% yield);  $R_f = 0.32$  (7:1 hexane/diethyl ether)

$^1\text{H NMR}$  (400 MHz,  $\text{CDCl}_3$ ):  $\delta$  9.75 (s, 1H), 7.15-7.30 (m, 5H), 4.93-4.97 (m, 1H), 2.57-2.70 (m, 2H), 2.48 (t,  $J = 7.6$ , 2H), 2.02 (s, 3H), 1.79-2.00 (m, 4H)

$^{13}\text{C NMR}$  (100 MHz,  $\text{CDCl}_3$ ):  $\delta$  201.2, 170.8, 141.2, 128.5, 128.3, 126.0, 72.9, 39.9, 35.8, 31.7, 26.5, 21.1

FTIR (neat):  $1730\text{ cm}^{-1}$ (br.)

HRMS Calcd. for  $\text{C}_{14}\text{H}_{19}\text{O}_3$  [ $\text{M}+\text{H}^+$ ]: 235.1334. Found: 235.1332

#### 6-Oxo-1-phenylhexan-3-yl benzoate

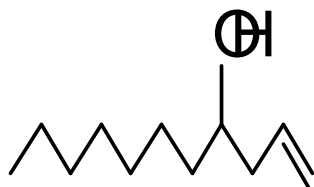

Colorless oil (82% yield);  $R_f = 0.31$  (7:1 hexane/diethyl ether)

$^1\text{H NMR}$  (400 MHz,  $\text{CDCl}_3$ ):  $\delta$  9.76 (s, 1H), 8.03 (d,  $J = 7.6$ , 2H), 7.43-7.59 (m, 3H), 7.16-7.28 (m, 3H), 5.19-5.25 (m, 1H), 2.66-2.76 (m, 2H), 2.56 (t,  $J = 7.6$ , 2H), 1.94-2.15 (m, 4H)

$^{13}\text{C NMR}$  (100 MHz,  $\text{CDCl}_3$ ):  $\delta$  201.1, 166.2, 141.1, 133.0, 130.1, 129.6, 128.43, 128.39, 128.3, 126.0, 73.4, 39.8, 36.0, 31.7, 26.6

FTIR (neat):  $1712\text{ cm}^{-1}$ (br.)

HRMS Calcd. for  $\text{C}_{19}\text{H}_{21}\text{O}_3$  [ $\text{M}+\text{H}^+$ ]: 297.1491. Found: 297.1498

### Preparation of $\gamma$ -Hydroxy(protected)- $\alpha$ -amino Acetals (**1b**, **1c** and **1d**):

Typical procedure for the diastereoselective synthesis of  $\gamma$ -hydroxy- $\alpha$ -amino acetals *via* iodine-catalyzed oxidative rearrangement of tertiary amines (*N,N*-dibenzyl-4-((*tert*-butyldiphenylsilyl)oxy)-1,1-dimethoxy-6-phenylhexan-2-amine **1a** as an example): 4-((*tert*-Butyldiphenylsilyl)oxy)-6-phenylhexanal **1** (0.279 g, 0.65 mmol) was added to a mixture of  $\text{HNBN}_2$  (0.153 g, 0.78 mmol) and  $\text{I}_2$  (33 mg, 0.13 mmol) in methanol (0.5 mL, 19

equiv.)/dichloroethane (2.0 mL), following addition of  $\text{NaCO}_3 \cdot 1.5\text{H}_2\text{O}_2$  (0.101g, 0.65 mmol). The mixture was stirred for 72 h at room temperature. The resulting reaction mixture was mixed with a small amount of silica gel and concentrated. The crude product was purified by flash silica gel column chromatography (triethylamine/diethyl ether/hexane = 0.1:1:100, v/v/v) to afford the desired product **1aa** as a light yellowish oil and **1ab** as a colorless crystal (62% total yield). The d.r. (**1ab**(*syn*)/**1aa**(*anti*)) was detected by crude  $^1\text{H}$  NMR before isolation. It is necessary to point out that most of the diastereoisomers were separated easily by silica gel column chromatography. The structure of compound **10ab** was conformed as *syn*-isomer according to its crystal structure (Figure 2) and the structures of other pairs of diastereoisomers were obtained by comparing their NMR data.

#### *N,N*-dibenzyl-4-(benzyloxy)-1,1-dimethoxy-6-phenylhexan-2-amine (**1b**)

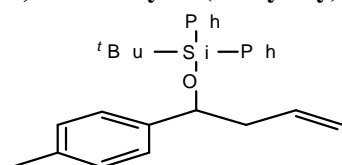

Light yellowish oil (46% total yield);  $R_f = 0.30$  (7:1 hexane/diethyl ether)

*Anti*- **1b** (**1ba**) mixed with *syn*- **1b** (**1bb**):

$^1\text{H}$  NMR (400 MHz,  $\text{CDCl}_3$ ):  $\delta$  7.07-7.34 (overlap), 4.40-4.47 (overlap), 4.18 (d,  $J = 11.2$ ), 3.64-3.84 (overlap), 3.33 (s), 3.32 (s), 3.04-3.07 (m), 2.64-2.73 (overlap), 1.80-1.84 (m)

$^{13}\text{C}$  NMR (100 MHz,  $\text{CDCl}_3$ ):  $\delta$  142.5, 140.6, 139.3, 129.1-128.0 (overlap), 127.8, 127.5, 127.0, 125.6, 106.7, 76.0, 70.2, 54.4-54.8 (overlap), 53.3, 36.0, 32.5, 31.2

*Syn*- **1b** (**1bb**) mixed with *anti*- **1b** (**1ba**):

$^1\text{H}$  NMR (400 MHz,  $\text{CDCl}_3$ ):  $\delta$  7.07-7.34 (overlap), 4.40-4.47 (overlap), 3.64-3.84 (overlap), 3.36 (s, 3H), 3.26 (s, 3H), 2.86-2.89 (m, 1H), 2.64-2.73 (overlap), 2.44-2.52 (m, 1H), 1.92-1.99 (m, 1H), 1.64-1.70 (m, 1H)

$^{13}\text{C}$  NMR (100 MHz,  $\text{CDCl}_3$ ):  $\delta$  142.7, 140.4, 139.0, 129.1-128.0 (overlap), 127.6, 127.2, 126.8, 125.5, 107.7, 76.4, 70.5, 54.4-54.8 (overlap), 35.4, 31.3, 30.8

FTIR (neat): 3050, 1634, 1603, 1495, 1454, 1265, 1067  $\text{cm}^{-1}$

HRMS Calcd. for  $\text{C}_{35}\text{H}_{42}\text{NO}_3$  [ $\text{M}+\text{H}^+$ ]: 524.3165. Found: 524.3166

#### 5-(Dibenzylamino)-6,6-dimethoxy-1-phenylhexan-3-yl acetate (**1c**)

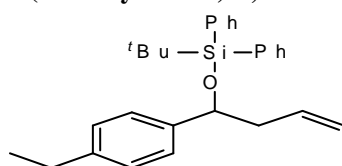

Light yellowish oil (63% total yield);  $R_f = 0.25$  (7:1 hexane/diethyl ether)

*Anti*- **1c** (**1ca**) mixed with *syn*- **1c** (**1cb**):

$^1\text{H}$  NMR (400 MHz,  $\text{CDCl}_3$ ):  $\delta$  7.04-7.40 (overlap), 5.05-5.11 (m), 4.46 (d,  $J = 4.8$ ), 3.83 (d,  $J = 13.6$ ), 3.59-3.66 (overlap), 3.31-3.39 (overlap), 2.89-2.91 (m), 2.40-2.60 (overlap), 1.66-1.95 (overlap)

$^{13}\text{C}$  NMR (100 MHz,  $\text{CDCl}_3$ ):  $\delta$  170.4, 141.7, 140.1, 129.2-128.1 (overlap), 126.78, 125.74, 105.9, 71.7, 55.2, 54.6, 54.0, 53.9, 35.9, 31.2, 30.6, 21.15

*Syn*- **1c** (**1cb**) mixed with *anti*- **1c** (**1ca**):

$^1\text{H}$  NMR (400 MHz,  $\text{CDCl}_3$ ):  $\delta$  7.04-7.40 (overlap), 5.13-5.20 (m, 1H), 4.41 (d,  $J = 4.8$ , 1H),

3.78 (d,  $J = 13.2$ , 2H), 3.59-3.66 (overlap), 3.31-3.39 (overlap), 2.76-2.80 (m, 1H), 2.40-2.60 (overlap), 1.66-1.95 (overlap), 1.43-1.53 (m, 2H)

$^{13}\text{C}$  NMR (100 MHz,  $\text{CDCl}_3$ ):  $\delta$  170.6, 141.9, 140.3, 129.2-128.1 (overlap), 126.85, 125.66, 107.0, 72.6, 55.0, 54.7, 54.4, 54.3, 35.0, 31.4, 31.0, 21.20

FTIR (neat): 3061, 1730, 1636, 1265, 1250  $\text{cm}^{-1}$

HRMS Calcd. for  $\text{C}_{30}\text{H}_{38}\text{NO}_4$   $[\text{M}+\text{H}^+]$ : 476.2801. Found: 476.2802

**5-(Dibenzylamino)-6,6-dimethoxy-1-phenylhexan-3-yl benzoate (1d)**

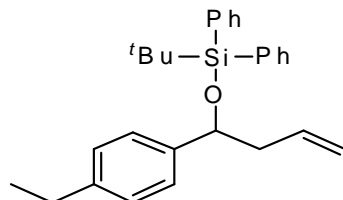

Light yellowish solid (74% total yield);  $R_f = 0.28$  (7:1 hexane/diethyl ether)

*Anti*- **1d** (**1da**) mixed with *syn*- **1d** (**1db**):

$^1\text{H}$  NMR (400 MHz,  $\text{CDCl}_3$ ):  $\delta$  7.84-7.86 (m), 6.98-7.55 (overlap), 5.32-5.38 (m), 4.47 (d,  $J = 4.4$ ), 3.79-3.85 (overlap), 3.62 (d,  $J = 13.6$ ), 3.42 (s), 3.34 (s), 2.98-3.02 (m), 2.50-2.74 (overlap), 1.82-2.18 (overlap)

$^{13}\text{C}$  NMR (100 MHz,  $\text{CDCl}_3$ ):  $\delta$  165.9, 141.6, 140.0, 132.4, 130.8, 129.4, 128.8, 128.3-128.2 (overlap), 128.0, 126.7, 125.8, 106.1, 72.4, 55.2, 54.7, 54.3, 54.2, 36.1, 31.3, 30.7

*Syn*- **1d** (**1db**) mixed with *anti*- **1c** (**1da**):

$^1\text{H}$  NMR (400 MHz,  $\text{CDCl}_3$ ):  $\delta$  7.95-7.97 (m, 2H), 6.98-7.55 (overlap), 5.39-5.45 (m, 1H), 4.42 (d,  $J = 4.4$ , 1H), 3.79-3.85 (overlap), 3.66 (d,  $J = 13.6$ , 2H), 3.37 (s, 3H), 3.28 (s, 3H), 2.98-3.02 (m, 1H), 2.50-2.74 (overlap), 1.82-2.18 (overlap), 1.58-1.74 (m, 2H)

$^{13}\text{C}$  NMR (100 MHz,  $\text{CDCl}_3$ ):  $\delta$  166.0, 141.9, 140.3, 132.6, 130.85, 129.5, 129.2, 128.3-128.2 (overlap), 126.8, 125.7, 107.1, 73.2, 55.0, 54.8, 54.5, 54.4, 35.3, 31.4, 31.0

FTIR (neat): 3053, 1713, 1452, 1265  $\text{cm}^{-1}$

HRMS Calcd. for  $\text{C}_{35}\text{H}_{40}\text{NO}_4$   $[\text{M}+\text{H}^+]$ : 538.2957. Found: 538.2957

## Crystal data and structure of *syn*-10a (10ab)

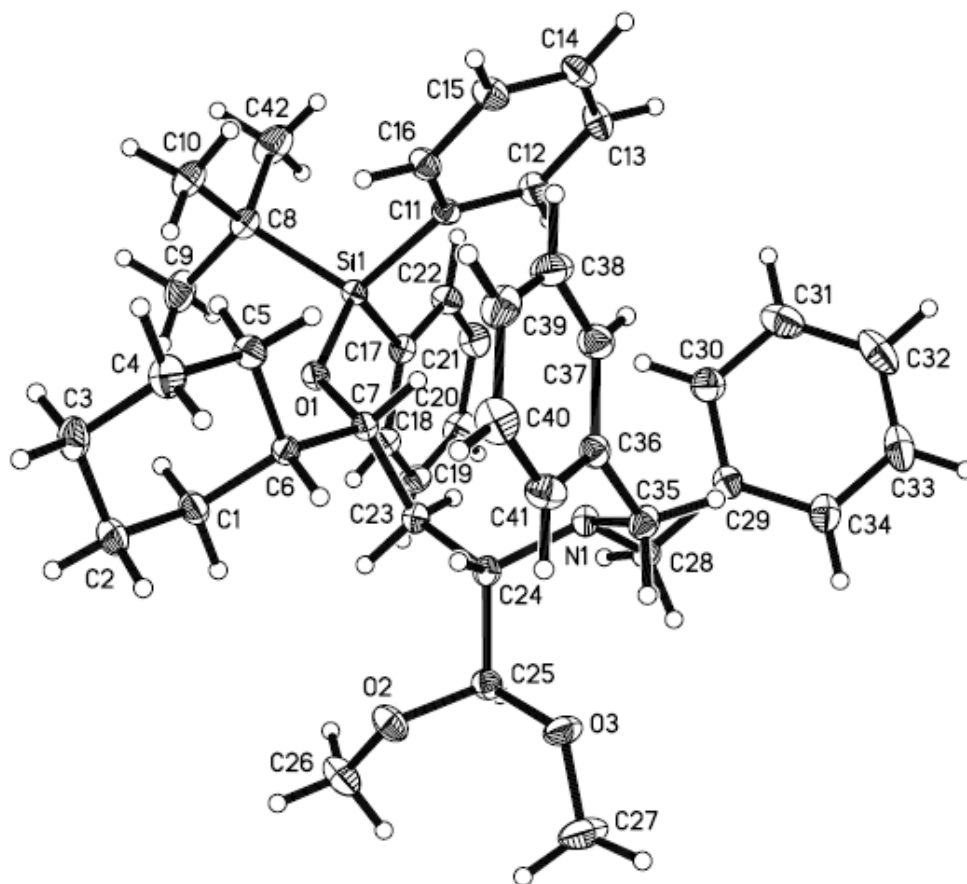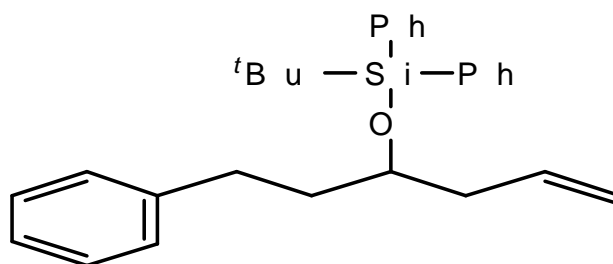

Table 1. Crystal data and structure refinement for ltp216s.

|                      |                                                     |
|----------------------|-----------------------------------------------------|
| Identification code  | ltp216s                                             |
| Empirical formula    | C <sub>42</sub> H <sub>55</sub> N O <sub>3</sub> Si |
| Formula weight       | 649.96                                              |
| Temperature          | 103(2) K                                            |
| Wavelength           | 0.71073 Å                                           |
| Crystal system       | Triclinic                                           |
| Space group          | P-1                                                 |
| Unit cell dimensions | a = 9.7071(2) Å $\beta$ = 81.2230(10)°.             |



|                                   |                                             |                             |
|-----------------------------------|---------------------------------------------|-----------------------------|
|                                   | $b = 11.1189(2) \text{ \AA}$                | $\beta = 76.8780(10)^\circ$ |
|                                   | $c = 18.7507(3) \text{ \AA}$                | $\gamma =$                  |
|                                   | 72.9850(10)°.                               |                             |
| Volume                            | 1876.61(6) Å <sup>3</sup>                   |                             |
| Z                                 | 2                                           |                             |
| Density (calculated)              | 1.150 Mg/m <sup>3</sup>                     |                             |
| Absorption coefficient            | 0.101 mm <sup>-1</sup>                      |                             |
| F(000)                            | 704                                         |                             |
| Crystal size                      | 0.40 x 0.40 x 0.36 mm <sup>3</sup>          |                             |
| Theta range for data collection   | 2.13 to 28.33°.                             |                             |
| Index ranges                      | -12<=h<=12, -14<=k<=12, -24<=l<=24          |                             |
| Reflections collected             | 27629                                       |                             |
| Independent reflections           | 9115 [R(int) = 0.0213]                      |                             |
| Completeness to theta = 25.00°    | 99.6 %                                      |                             |
| Absorption correction             | Semi-empirical from equivalents             |                             |
| Max. and min. transmission        | 0.9647 and 0.9608                           |                             |
| Refinement method                 | Full-matrix least-squares on F <sup>2</sup> |                             |
| Data / restraints / parameters    | 9115 / 0 / 429                              |                             |
| Goodness-of-fit on F <sup>2</sup> | 1.071                                       |                             |
| Final R indices [I>2sigma(I)]     | R1 = 0.0372, wR2 = 0.0990                   |                             |
| R indices (all data)              | R1 = 0.0461, wR2 = 0.1094                   |                             |
| Largest diff. peak and hole       | 0.376 and -0.252 e.Å <sup>-3</sup>          |                             |

Table 2. Atomic coordinates ( $\times 10^4$ ) and equivalent isotropic displacement parameters ( $\text{\AA}^2 \times 10^3$ ) for ltp216s.  $U(\text{eq})$  is defined as one third of the trace of the orthogonalized  $U^{ij}$  tensor.

|       | x       | y        | z       | U(eq) |
|-------|---------|----------|---------|-------|
| C(1)  | 8540(1) | 7118(1)  | 1532(1) | 20(1) |
| C(2)  | 8996(1) | 5897(1)  | 1151(1) | 24(1) |
| C(3)  | 8310(1) | 6082(1)  | 474(1)  | 24(1) |
| C(4)  | 6645(1) | 6582(1)  | 665(1)  | 24(1) |
| C(5)  | 6187(1) | 7798(1)  | 1048(1) | 18(1) |
| C(6)  | 6868(1) | 7615(1)  | 1731(1) | 14(1) |
| C(7)  | 6356(1) | 8812(1)  | 2140(1) | 13(1) |
| C(8)  | 7384(1) | 11754(1) | 632(1)  | 17(1) |
| C(9)  | 9041(1) | 11381(2) | 618(1)  | 30(1) |
| C(10) | 7107(1) | 11071(1) | 48(1)   | 23(1) |
| C(11) | 4384(1) | 11768(1) | 1670(1) | 15(1) |
| C(12) | 3426(1) | 12704(1) | 2105(1) | 19(1) |
| C(13) | 1929(1) | 13097(1) | 2096(1) | 23(1) |

|       |         |          |         |       |
|-------|---------|----------|---------|-------|
| C(14) | 1344(1) | 12547(1) | 1664(1) | 22(1) |
| C(15) | 2263(1) | 11595(1) | 1242(1) | 20(1) |
| C(16) | 3757(1) | 11214(1) | 1245(1) | 19(1) |
| C(17) | 7014(1) | 12027(1) | 2268(1) | 16(1) |
| C(18) | 8091(1) | 11301(1) | 2664(1) | 17(1) |
| C(19) | 8604(1) | 11836(1) | 3143(1) | 21(1) |
| C(20) | 8045(1) | 13114(1) | 3240(1) | 23(1) |
| C(21) | 7000(1) | 13860(1) | 2845(1) | 23(1) |
| C(22) | 6503(1) | 13324(1) | 2362(1) | 20(1) |
| C(23) | 6730(1) | 8588(1)  | 2908(1) | 15(1) |
| C(24) | 5851(1) | 7770(1)  | 3448(1) | 15(1) |
| C(25) | 6774(1) | 6952(1)  | 4000(1) | 17(1) |
| C(26) | 9380(1) | 5998(1)  | 3692(1) | 29(1) |
| C(27) | 6492(2) | 5694(2)  | 5136(1) | 34(1) |
| C(28) | 4415(1) | 9214(1)  | 4389(1) | 18(1) |
| C(29) | 3038(1) | 10279(1) | 4546(1) | 18(1) |
| C(30) | 2651(1) | 11242(1) | 4002(1) | 25(1) |
| C(31) | 1359(2) | 12197(1) | 4143(1) | 32(1) |
| C(32) | 440(2)  | 12201(1) | 4827(1) | 33(1) |
| C(33) | 820(1)  | 11255(1) | 5372(1) | 30(1) |
| C(34) | 2112(1) | 10297(1) | 5233(1) | 23(1) |
| C(35) | 3224(1) | 7924(1)  | 3928(1) | 19(1) |
| C(36) | 2848(1) | 7682(1)  | 3233(1) | 17(1) |
| C(37) | 2167(1) | 8692(1)  | 2780(1) | 22(1) |
| C(38) | 1778(1) | 8482(1)  | 2149(1) | 26(1) |
| C(39) | 2090(1) | 7261(1)  | 1956(1) | 25(1) |
| C(40) | 2788(1) | 6254(1)  | 2393(1) | 26(1) |
| C(41) | 3154(1) | 6464(1)  | 3031(1) | 22(1) |
| C(42) | 6852(2) | 13186(1) | 443(1)  | 32(1) |
| N(1)  | 4404(1) | 8567(1)  | 3765(1) | 15(1) |
| O(1)  | 7042(1) | 9739(1)  | 1699(1) | 15(1) |
| O(2)  | 7945(1) | 6057(1)  | 3602(1) | 22(1) |
| O(3)  | 5866(1) | 6331(1)  | 4520(1) | 23(1) |
| Si(1) | 6432(1) | 11282(1) | 1590(1) | 13(1) |

Table 3. Bond lengths [ $\text{\AA}$ ] and angles [ $^\circ$ ] for ltp216s.

|            |            |
|------------|------------|
| C(1)-C(6)  | 1.5309(15) |
| C(1)-C(2)  | 1.5322(16) |
| C(1)-H(1A) | 0.9900     |
| C(1)-H(1B) | 0.9900     |
| C(2)-C(3)  | 1.5252(18) |
| C(2)-H(2A) | 0.9900     |
| C(2)-H(2B) | 0.9900     |

|              |            |
|--------------|------------|
| C(3)-C(4)    | 1.5238(18) |
| C(3)-H(3A)   | 0.9900     |
| C(3)-H(3B)   | 0.9900     |
| C(4)-C(5)    | 1.5293(16) |
| C(4)-H(4A)   | 0.9900     |
| C(4)-H(4B)   | 0.9900     |
| C(5)-C(6)    | 1.5310(15) |
| C(5)-H(5A)   | 0.9900     |
| C(5)-H(5B)   | 0.9900     |
| C(6)-C(7)    | 1.5347(15) |
| C(6)-H(6)    | 1.0000     |
| C(7)-O(1)    | 1.4418(13) |
| C(7)-C(23)   | 1.5305(14) |
| C(7)-H(7)    | 1.0000     |
| C(8)-C(9)    | 1.5340(17) |
| C(8)-C(10)   | 1.5351(15) |
| C(8)-C(42)   | 1.5352(18) |
| C(8)-Si(1)   | 1.8967(12) |
| C(9)-H(9A)   | 0.9800     |
| C(9)-H(9B)   | 0.9800     |
| C(9)-H(9C)   | 0.9800     |
| C(10)-H(10A) | 0.9800     |
| C(10)-H(10B) | 0.9800     |
| C(10)-H(10C) | 0.9800     |
| C(11)-C(12)  | 1.4001(16) |
| C(11)-C(16)  | 1.4061(15) |
| C(11)-Si(1)  | 1.8774(11) |
| C(12)-C(13)  | 1.3925(17) |
| C(12)-H(12)  | 0.9500     |
| C(13)-C(14)  | 1.3843(17) |
| C(13)-H(13)  | 0.9500     |
| C(14)-C(15)  | 1.3866(17) |
| C(14)-H(14)  | 0.9500     |
| C(15)-C(16)  | 1.3882(16) |
| C(15)-H(15)  | 0.9500     |
| C(16)-H(16)  | 0.9500     |
| C(17)-C(18)  | 1.4046(16) |
| C(17)-C(22)  | 1.4051(16) |
| C(17)-Si(1)  | 1.8826(11) |
| C(18)-C(19)  | 1.3957(16) |
| C(18)-H(18)  | 0.9500     |
| C(19)-C(20)  | 1.3885(18) |
| C(19)-H(19)  | 0.9500     |
| C(20)-C(21)  | 1.3877(18) |

|              |            |
|--------------|------------|
| C(20)-H(20)  | 0.9500     |
| C(21)-C(22)  | 1.3929(16) |
| C(21)-H(21)  | 0.9500     |
| C(22)-H(22)  | 0.9500     |
| C(23)-C(24)  | 1.5370(15) |
| C(23)-H(23A) | 0.9900     |
| C(23)-H(23B) | 0.9900     |
| C(24)-N(1)   | 1.4710(14) |
| C(24)-C(25)  | 1.5363(15) |
| C(24)-H(24)  | 1.0000     |
| C(25)-O(3)   | 1.4010(14) |
| C(25)-O(2)   | 1.4204(14) |
| C(25)-H(25)  | 1.0000     |
| C(26)-O(2)   | 1.4219(15) |
| C(26)-H(26A) | 0.9800     |
| C(26)-H(26B) | 0.9800     |
| C(26)-H(26C) | 0.9800     |
| C(27)-O(3)   | 1.4237(15) |
| C(27)-H(27A) | 0.9800     |
| C(27)-H(27B) | 0.9800     |
| C(27)-H(27C) | 0.9800     |
| C(28)-N(1)   | 1.4680(14) |
| C(28)-C(29)  | 1.5096(16) |
| C(28)-H(28A) | 0.9900     |
| C(28)-H(28B) | 0.9900     |
| C(29)-C(30)  | 1.3908(17) |
| C(29)-C(34)  | 1.3924(17) |
| C(30)-C(31)  | 1.3881(18) |
| C(30)-H(30)  | 0.9500     |
| C(31)-C(32)  | 1.387(2)   |
| C(31)-H(31)  | 0.9500     |
| C(32)-C(33)  | 1.379(2)   |
| C(32)-H(32)  | 0.9500     |
| C(33)-C(34)  | 1.3890(18) |
| C(33)-H(33)  | 0.9500     |
| C(34)-H(34)  | 0.9500     |
| C(35)-N(1)   | 1.4733(14) |
| C(35)-C(36)  | 1.5115(15) |
| C(35)-H(35A) | 0.9900     |
| C(35)-H(35B) | 0.9900     |
| C(36)-C(41)  | 1.3911(17) |
| C(36)-C(37)  | 1.3961(16) |
| C(37)-C(38)  | 1.3912(17) |
| C(37)-H(37)  | 0.9500     |

|              |            |
|--------------|------------|
| C(38)-C(39)  | 1.3871(19) |
| C(38)-H(38)  | 0.9500     |
| C(39)-C(40)  | 1.3821(19) |
| C(39)-H(39)  | 0.9500     |
| C(40)-C(41)  | 1.3932(17) |
| C(40)-H(40)  | 0.9500     |
| C(41)-H(41)  | 0.9500     |
| C(42)-H(42A) | 0.9800     |
| C(42)-H(42B) | 0.9800     |
| C(42)-H(42C) | 0.9800     |
| O(1)-Si(1)   | 1.6405(8)  |

|                  |            |
|------------------|------------|
| C(6)-C(1)-C(2)   | 111.41(10) |
| C(6)-C(1)-H(1A)  | 109.3      |
| C(2)-C(1)-H(1A)  | 109.3      |
| C(6)-C(1)-H(1B)  | 109.3      |
| C(2)-C(1)-H(1B)  | 109.3      |
| H(1A)-C(1)-H(1B) | 108.0      |
| C(3)-C(2)-C(1)   | 111.21(10) |
| C(3)-C(2)-H(2A)  | 109.4      |
| C(1)-C(2)-H(2A)  | 109.4      |
| C(3)-C(2)-H(2B)  | 109.4      |
| C(1)-C(2)-H(2B)  | 109.4      |
| H(2A)-C(2)-H(2B) | 108.0      |
| C(4)-C(3)-C(2)   | 111.30(10) |
| C(4)-C(3)-H(3A)  | 109.4      |
| C(2)-C(3)-H(3A)  | 109.4      |
| C(4)-C(3)-H(3B)  | 109.4      |
| C(2)-C(3)-H(3B)  | 109.4      |
| H(3A)-C(3)-H(3B) | 108.0      |
| C(3)-C(4)-C(5)   | 111.43(10) |
| C(3)-C(4)-H(4A)  | 109.3      |
| C(5)-C(4)-H(4A)  | 109.3      |
| C(3)-C(4)-H(4B)  | 109.3      |
| C(5)-C(4)-H(4B)  | 109.3      |
| H(4A)-C(4)-H(4B) | 108.0      |
| C(4)-C(5)-C(6)   | 111.55(10) |
| C(4)-C(5)-H(5A)  | 109.3      |
| C(6)-C(5)-H(5A)  | 109.3      |
| C(4)-C(5)-H(5B)  | 109.3      |
| C(6)-C(5)-H(5B)  | 109.3      |
| H(5A)-C(5)-H(5B) | 108.0      |
| C(1)-C(6)-C(5)   | 110.53(9)  |
| C(1)-C(6)-C(7)   | 113.36(9)  |

|                     |            |
|---------------------|------------|
| C(5)-C(6)-C(7)      | 111.88(9)  |
| C(1)-C(6)-H(6)      | 106.9      |
| C(5)-C(6)-H(6)      | 106.9      |
| C(7)-C(6)-H(6)      | 106.9      |
| O(1)-C(7)-C(23)     | 109.46(8)  |
| O(1)-C(7)-C(6)      | 107.90(8)  |
| C(23)-C(7)-C(6)     | 113.42(9)  |
| O(1)-C(7)-H(7)      | 108.7      |
| C(23)-C(7)-H(7)     | 108.7      |
| C(6)-C(7)-H(7)      | 108.7      |
| C(9)-C(8)-C(10)     | 108.33(10) |
| C(9)-C(8)-C(42)     | 109.35(11) |
| C(10)-C(8)-C(42)    | 109.03(10) |
| C(9)-C(8)-Si(1)     | 108.07(8)  |
| C(10)-C(8)-Si(1)    | 111.62(8)  |
| C(42)-C(8)-Si(1)    | 110.40(8)  |
| C(8)-C(9)-H(9A)     | 109.5      |
| C(8)-C(9)-H(9B)     | 109.5      |
| H(9A)-C(9)-H(9B)    | 109.5      |
| C(8)-C(9)-H(9C)     | 109.5      |
| H(9A)-C(9)-H(9C)    | 109.5      |
| H(9B)-C(9)-H(9C)    | 109.5      |
| C(8)-C(10)-H(10A)   | 109.5      |
| C(8)-C(10)-H(10B)   | 109.5      |
| H(10A)-C(10)-H(10B) | 109.5      |
| C(8)-C(10)-H(10C)   | 109.5      |
| H(10A)-C(10)-H(10C) | 109.5      |
| H(10B)-C(10)-H(10C) | 109.5      |
| C(12)-C(11)-C(16)   | 116.89(10) |
| C(12)-C(11)-Si(1)   | 124.10(9)  |
| C(16)-C(11)-Si(1)   | 118.93(8)  |
| C(13)-C(12)-C(11)   | 121.48(11) |
| C(13)-C(12)-H(12)   | 119.3      |
| C(11)-C(12)-H(12)   | 119.3      |
| C(14)-C(13)-C(12)   | 120.38(11) |
| C(14)-C(13)-H(13)   | 119.8      |
| C(12)-C(13)-H(13)   | 119.8      |
| C(13)-C(14)-C(15)   | 119.36(11) |
| C(13)-C(14)-H(14)   | 120.3      |
| C(15)-C(14)-H(14)   | 120.3      |
| C(14)-C(15)-C(16)   | 120.24(11) |
| C(14)-C(15)-H(15)   | 119.9      |
| C(16)-C(15)-H(15)   | 119.9      |
| C(15)-C(16)-C(11)   | 121.63(11) |

|                     |            |
|---------------------|------------|
| C(15)-C(16)-H(16)   | 119.2      |
| C(11)-C(16)-H(16)   | 119.2      |
| C(18)-C(17)-C(22)   | 116.89(10) |
| C(18)-C(17)-Si(1)   | 119.99(9)  |
| C(22)-C(17)-Si(1)   | 122.93(8)  |
| C(19)-C(18)-C(17)   | 121.57(11) |
| C(19)-C(18)-H(18)   | 119.2      |
| C(17)-C(18)-H(18)   | 119.2      |
| C(20)-C(19)-C(18)   | 120.05(11) |
| C(20)-C(19)-H(19)   | 120.0      |
| C(18)-C(19)-H(19)   | 120.0      |
| C(21)-C(20)-C(19)   | 119.67(11) |
| C(21)-C(20)-H(20)   | 120.2      |
| C(19)-C(20)-H(20)   | 120.2      |
| C(20)-C(21)-C(22)   | 120.02(11) |
| C(20)-C(21)-H(21)   | 120.0      |
| C(22)-C(21)-H(21)   | 120.0      |
| C(21)-C(22)-C(17)   | 121.75(11) |
| C(21)-C(22)-H(22)   | 119.1      |
| C(17)-C(22)-H(22)   | 119.1      |
| C(7)-C(23)-C(24)    | 112.63(9)  |
| C(7)-C(23)-H(23A)   | 109.1      |
| C(24)-C(23)-H(23A)  | 109.1      |
| C(7)-C(23)-H(23B)   | 109.1      |
| C(24)-C(23)-H(23B)  | 109.1      |
| H(23A)-C(23)-H(23B) | 107.8      |
| N(1)-C(24)-C(25)    | 116.09(9)  |
| N(1)-C(24)-C(23)    | 109.71(9)  |
| C(25)-C(24)-C(23)   | 110.36(9)  |
| N(1)-C(24)-H(24)    | 106.7      |
| C(25)-C(24)-H(24)   | 106.7      |
| C(23)-C(24)-H(24)   | 106.7      |
| O(3)-C(25)-O(2)     | 110.11(9)  |
| O(3)-C(25)-C(24)    | 107.52(9)  |
| O(2)-C(25)-C(24)    | 107.32(9)  |
| O(3)-C(25)-H(25)    | 110.6      |
| O(2)-C(25)-H(25)    | 110.6      |
| C(24)-C(25)-H(25)   | 110.6      |
| O(2)-C(26)-H(26A)   | 109.5      |
| O(2)-C(26)-H(26B)   | 109.5      |
| H(26A)-C(26)-H(26B) | 109.5      |
| O(2)-C(26)-H(26C)   | 109.5      |
| H(26A)-C(26)-H(26C) | 109.5      |
| H(26B)-C(26)-H(26C) | 109.5      |

|                     |            |
|---------------------|------------|
| O(3)-C(27)-H(27A)   | 109.5      |
| O(3)-C(27)-H(27B)   | 109.5      |
| H(27A)-C(27)-H(27B) | 109.5      |
| O(3)-C(27)-H(27C)   | 109.5      |
| H(27A)-C(27)-H(27C) | 109.5      |
| H(27B)-C(27)-H(27C) | 109.5      |
| N(1)-C(28)-C(29)    | 110.99(9)  |
| N(1)-C(28)-H(28A)   | 109.4      |
| C(29)-C(28)-H(28A)  | 109.4      |
| N(1)-C(28)-H(28B)   | 109.4      |
| C(29)-C(28)-H(28B)  | 109.4      |
| H(28A)-C(28)-H(28B) | 108.0      |
| C(30)-C(29)-C(34)   | 118.86(11) |
| C(30)-C(29)-C(28)   | 120.61(11) |
| C(34)-C(29)-C(28)   | 120.52(11) |
| C(31)-C(30)-C(29)   | 120.31(12) |
| C(31)-C(30)-H(30)   | 119.8      |
| C(29)-C(30)-H(30)   | 119.8      |
| C(32)-C(31)-C(30)   | 120.35(13) |
| C(32)-C(31)-H(31)   | 119.8      |
| C(30)-C(31)-H(31)   | 119.8      |
| C(33)-C(32)-C(31)   | 119.73(13) |
| C(33)-C(32)-H(32)   | 120.1      |
| C(31)-C(32)-H(32)   | 120.1      |
| C(32)-C(33)-C(34)   | 120.12(13) |
| C(32)-C(33)-H(33)   | 119.9      |
| C(34)-C(33)-H(33)   | 119.9      |
| C(33)-C(34)-C(29)   | 120.64(13) |
| C(33)-C(34)-H(34)   | 119.7      |
| C(29)-C(34)-H(34)   | 119.7      |
| N(1)-C(35)-C(36)    | 111.64(9)  |
| N(1)-C(35)-H(35A)   | 109.3      |
| C(36)-C(35)-H(35A)  | 109.3      |
| N(1)-C(35)-H(35B)   | 109.3      |
| C(36)-C(35)-H(35B)  | 109.3      |
| H(35A)-C(35)-H(35B) | 108.0      |
| C(41)-C(36)-C(37)   | 118.47(11) |
| C(41)-C(36)-C(35)   | 121.49(11) |
| C(37)-C(36)-C(35)   | 120.04(11) |
| C(38)-C(37)-C(36)   | 120.68(12) |
| C(38)-C(37)-H(37)   | 119.7      |
| C(36)-C(37)-H(37)   | 119.7      |
| C(39)-C(38)-C(37)   | 120.08(12) |
| C(39)-C(38)-H(38)   | 120.0      |



|                     |            |
|---------------------|------------|
| C(37)-C(38)-H(38)   | 120.0      |
| C(40)-C(39)-C(38)   | 119.83(12) |
| C(40)-C(39)-H(39)   | 120.1      |
| C(38)-C(39)-H(39)   | 120.1      |
| C(39)-C(40)-C(41)   | 120.03(12) |
| C(39)-C(40)-H(40)   | 120.0      |
| C(41)-C(40)-H(40)   | 120.0      |
| C(36)-C(41)-C(40)   | 120.89(12) |
| C(36)-C(41)-H(41)   | 119.6      |
| C(40)-C(41)-H(41)   | 119.6      |
| C(8)-C(42)-H(42A)   | 109.5      |
| C(8)-C(42)-H(42B)   | 109.5      |
| H(42A)-C(42)-H(42B) | 109.5      |
| C(8)-C(42)-H(42C)   | 109.5      |
| H(42A)-C(42)-H(42C) | 109.5      |
| H(42B)-C(42)-H(42C) | 109.5      |
| C(28)-N(1)-C(24)    | 113.98(9)  |
| C(28)-N(1)-C(35)    | 111.95(9)  |
| C(24)-N(1)-C(35)    | 113.89(9)  |
| C(7)-O(1)-Si(1)     | 130.37(7)  |
| C(25)-O(2)-C(26)    | 116.03(9)  |
| C(25)-O(3)-C(27)    | 114.14(10) |
| O(1)-Si(1)-C(11)    | 110.45(5)  |
| O(1)-Si(1)-C(17)    | 110.38(5)  |
| C(11)-Si(1)-C(17)   | 111.69(5)  |
| O(1)-Si(1)-C(8)     | 105.03(5)  |
| C(11)-Si(1)-C(8)    | 111.05(5)  |
| C(17)-Si(1)-C(8)    | 108.01(5)  |

Symmetry transformations used to generate equivalent atoms:

Table 4. Anisotropic displacement parameters ( $\text{\AA}^2 \times 10^3$ ) for ltp216s. The anisotropic displacement factor exponent takes the form:  $-2h^2 a^* U^{11} + \dots + 2hk a^* b^* U^{12}$

|      | U <sup>11</sup> | U <sup>22</sup> | U <sup>33</sup> | U <sup>23</sup> | U <sup>13</sup> | U <sup>12</sup> |
|------|-----------------|-----------------|-----------------|-----------------|-----------------|-----------------|
| C(1) | 18(1)           | 20(1)           | 20(1)           | -6(1)           | -4(1)           | 0(1)            |
| C(2) | 24(1)           | 18(1)           | 25(1)           | -6(1)           | 0(1)            | 2(1)            |
| C(3) | 28(1)           | 20(1)           | 23(1)           | -9(1)           | 2(1)            | -6(1)           |
| C(4) | 28(1)           | 21(1)           | 25(1)           | -10(1)          | -4(1)           | -8(1)           |
| C(5) | 20(1)           | 17(1)           | 20(1)           | -5(1)           | -6(1)           | -4(1)           |
| C(6) | 16(1)           | 11(1)           | 15(1)           | -2(1)           | -2(1)           | -3(1)           |
| C(7) | 13(1)           | 12(1)           | 15(1)           | -2(1)           | -1(1)           | -4(1)           |
| C(8) | 20(1)           | 17(1)           | 16(1)           | -1(1)           | -3(1)           | -8(1)           |

|       |       |       |       |        |        |        |
|-------|-------|-------|-------|--------|--------|--------|
| C(9)  | 21(1) | 48(1) | 23(1) | -7(1)  | 1(1)   | -16(1) |
| C(10) | 30(1) | 26(1) | 16(1) | -3(1)  | -4(1)  | -13(1) |
| C(11) | 15(1) | 12(1) | 17(1) | 1(1)   | -4(1)  | -4(1)  |
| C(12) | 19(1) | 19(1) | 21(1) | -5(1)  | -3(1)  | -6(1)  |
| C(13) | 18(1) | 22(1) | 28(1) | -9(1)  | 0(1)   | -2(1)  |
| C(14) | 15(1) | 21(1) | 29(1) | -1(1)  | -6(1)  | -2(1)  |
| C(15) | 19(1) | 20(1) | 26(1) | -3(1)  | -8(1)  | -6(1)  |
| C(16) | 18(1) | 16(1) | 22(1) | -5(1)  | -4(1)  | -2(1)  |
| C(17) | 16(1) | 16(1) | 16(1) | -2(1)  | -2(1)  | -7(1)  |
| C(18) | 18(1) | 16(1) | 18(1) | -1(1)  | -3(1)  | -7(1)  |
| C(19) | 23(1) | 25(1) | 19(1) | 1(1)   | -8(1)  | -10(1) |
| C(20) | 28(1) | 27(1) | 21(1) | -7(1)  | -6(1)  | -13(1) |
| C(21) | 26(1) | 18(1) | 27(1) | -8(1)  | -4(1)  | -7(1)  |
| C(22) | 21(1) | 16(1) | 23(1) | -3(1)  | -6(1)  | -5(1)  |
| C(23) | 16(1) | 16(1) | 15(1) | -3(1)  | -2(1)  | -6(1)  |
| C(24) | 15(1) | 15(1) | 15(1) | -3(1)  | -2(1)  | -5(1)  |
| C(25) | 18(1) | 14(1) | 19(1) | -2(1)  | -3(1)  | -4(1)  |
| C(26) | 20(1) | 27(1) | 38(1) | -9(1)  | -6(1)  | 2(1)   |
| C(27) | 38(1) | 35(1) | 30(1) | 16(1)  | -15(1) | -14(1) |
| C(28) | 18(1) | 21(1) | 15(1) | -4(1)  | -4(1)  | -4(1)  |
| C(29) | 17(1) | 20(1) | 19(1) | -6(1)  | -4(1)  | -4(1)  |
| C(30) | 26(1) | 25(1) | 23(1) | -4(1)  | -5(1)  | -3(1)  |
| C(31) | 32(1) | 24(1) | 38(1) | -5(1)  | -14(1) | 1(1)   |
| C(32) | 20(1) | 31(1) | 48(1) | -20(1) | -9(1)  | 3(1)   |
| C(33) | 19(1) | 41(1) | 31(1) | -17(1) | 2(1)   | -8(1)  |
| C(34) | 20(1) | 28(1) | 22(1) | -7(1)  | -2(1)  | -8(1)  |
| C(35) | 17(1) | 24(1) | 16(1) | 0(1)   | -2(1)  | -9(1)  |
| C(36) | 14(1) | 20(1) | 18(1) | -1(1)  | -2(1)  | -6(1)  |
| C(37) | 22(1) | 19(1) | 23(1) | -2(1)  | -5(1)  | -4(1)  |
| C(38) | 27(1) | 28(1) | 22(1) | 3(1)   | -10(1) | -6(1)  |
| C(39) | 25(1) | 34(1) | 20(1) | -4(1)  | -6(1)  | -13(1) |
| C(40) | 27(1) | 23(1) | 32(1) | -8(1)  | -6(1)  | -10(1) |
| C(41) | 22(1) | 20(1) | 27(1) | 1(1)   | -8(1)  | -7(1)  |
| C(42) | 52(1) | 19(1) | 24(1) | 3(1)   | -3(1)  | -15(1) |
| N(1)  | 14(1) | 18(1) | 15(1) | -4(1)  | -2(1)  | -5(1)  |
| O(1)  | 15(1) | 11(1) | 17(1) | -1(1)  | -1(1)  | -4(1)  |
| O(2)  | 21(1) | 17(1) | 29(1) | -8(1)  | -6(1)  | -1(1)  |
| O(3)  | 24(1) | 23(1) | 21(1) | 7(1)   | -7(1)  | -9(1)  |
| Si(1) | 13(1) | 11(1) | 14(1) | -2(1)  | -3(1)  | -3(1)  |

---

Table 5. Hydrogen coordinates ( $\times 10^4$ ) and isotropic displacement parameters ( $\text{\AA}^2 \times 10^{-3}$ ) for ltp216s.

|        | x     | y     | z    | U(eq) |
|--------|-------|-------|------|-------|
| H(1A)  | 8955  | 6956  | 1984 | 24    |
| H(1B)  | 8947  | 7767  | 1202 | 24    |
| H(2A)  | 10079 | 5629  | 1004 | 29    |
| H(2B)  | 8684  | 5221  | 1501 | 29    |
| H(3A)  | 8714  | 6685  | 100  | 28    |
| H(3B)  | 8568  | 5266  | 259  | 28    |
| H(4A)  | 6231  | 5934  | 992  | 28    |
| H(4B)  | 6239  | 6749  | 210  | 28    |
| H(5A)  | 5104  | 8066  | 1194 | 22    |
| H(5B)  | 6501  | 8475  | 701  | 22    |
| H(6)   | 6503  | 6944  | 2074 | 17    |
| H(7)   | 5268  | 9146  | 2188 | 16    |
| H(9A)  | 9378  | 10471 | 752  | 45    |
| H(9B)  | 9245  | 11843 | 970  | 45    |
| H(9C)  | 9559  | 11591 | 123  | 45    |
| H(10A) | 7666  | 11292 | -434 | 34    |
| H(10B) | 6057  | 11329 | 33   | 34    |
| H(10C) | 7420  | 10156 | 172  | 34    |
| H(12)  | 3805  | 13080 | 2412 | 23    |
| H(13)  | 1306  | 13747 | 2388 | 28    |
| H(14)  | 324   | 12818 | 1657 | 26    |
| H(15)  | 1868  | 11203 | 950  | 25    |
| H(16)  | 4372  | 10561 | 952  | 22    |
| H(18)  | 8479  | 10425 | 2605 | 21    |
| H(19)  | 9335  | 11326 | 3404 | 25    |
| H(20)  | 8376  | 13475 | 3574 | 28    |
| H(21)  | 6625  | 14737 | 2903 | 28    |
| H(22)  | 5800  | 13848 | 2089 | 24    |
| H(23A) | 6527  | 9414  | 3104 | 18    |
| H(23B) | 7792  | 8170  | 2870 | 18    |
| H(24)  | 5669  | 7177  | 3151 | 18    |
| H(25)  | 7162  | 7486  | 4245 | 20    |
| H(26A) | 9600  | 6807  | 3503 | 44    |
| H(26B) | 10097 | 5323  | 3419 | 44    |
| H(26C) | 9432  | 5825  | 4215 | 44    |
| H(27A) | 7352  | 5003  | 4974 | 51    |

|        |      |       |      |    |
|--------|------|-------|------|----|
| H(27B) | 5765 | 5351  | 5495 | 51 |
| H(27C) | 6791 | 6289  | 5365 | 51 |
| H(28A) | 5284 | 9554  | 4278 | 21 |
| H(28B) | 4492 | 8601  | 4830 | 21 |
| H(30)  | 3274 | 11246 | 3531 | 30 |
| H(31)  | 1103 | 12853 | 3768 | 38 |
| H(32)  | -447 | 12852 | 4921 | 40 |
| H(33)  | 197  | 11257 | 5842 | 36 |
| H(34)  | 2367 | 9648  | 5611 | 27 |
| H(35A) | 2338 | 8451  | 4225 | 22 |
| H(35B) | 3539 | 7110  | 4223 | 22 |
| H(37)  | 1966 | 9532  | 2904 | 26 |
| H(38)  | 1299 | 9175  | 1850 | 31 |
| H(39)  | 1825 | 7117  | 1526 | 30 |
| H(40)  | 3019 | 5418  | 2257 | 31 |
| H(41)  | 3620 | 5767  | 3333 | 27 |
| H(42A) | 7093 | 13628 | 793  | 47 |
| H(42B) | 5786 | 13431 | 474  | 47 |
| H(42C) | 7336 | 13413 | -56  | 47 |

---

-

## NMR Spectra

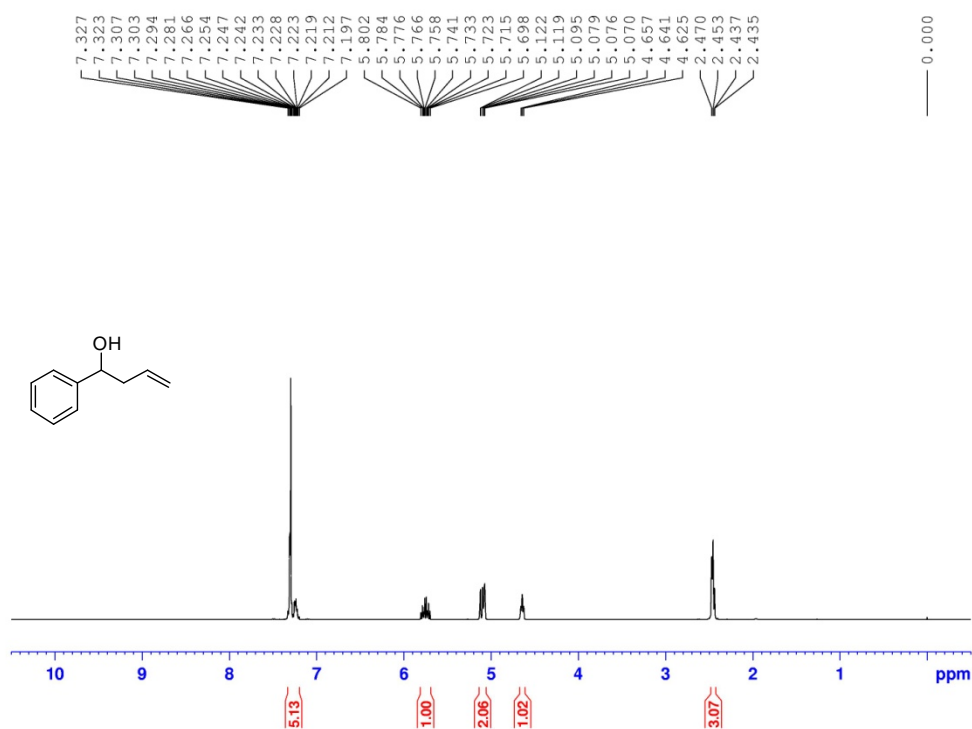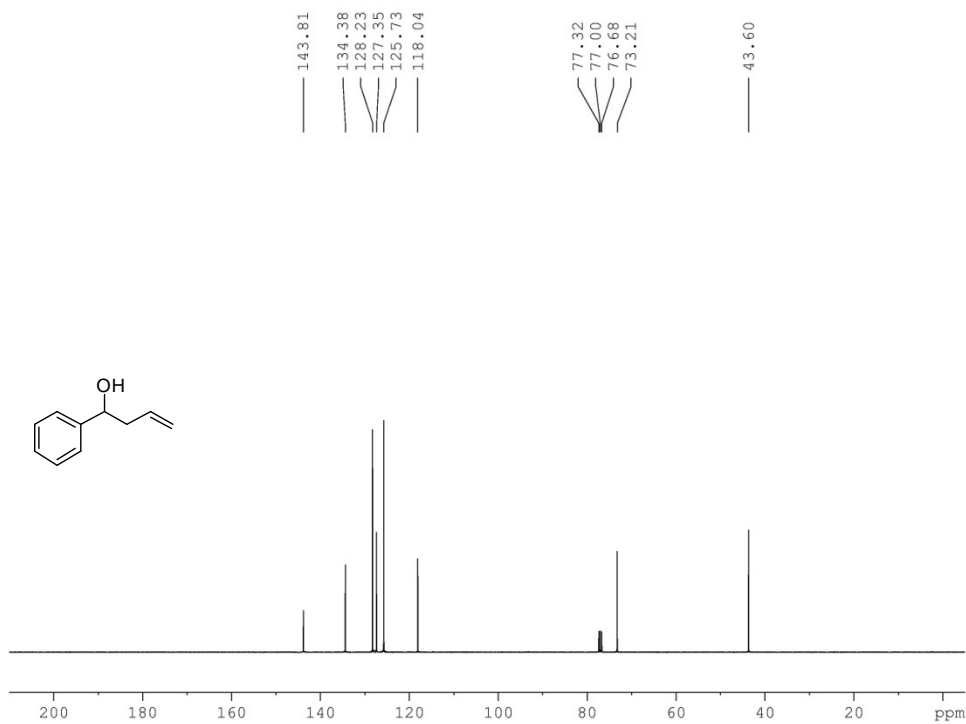

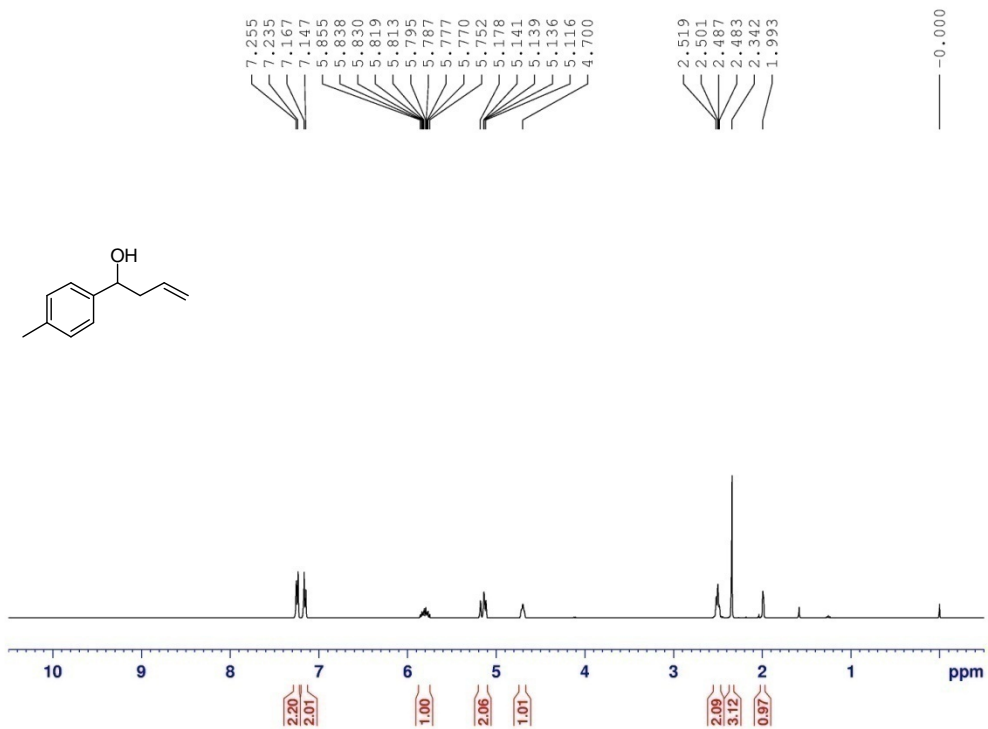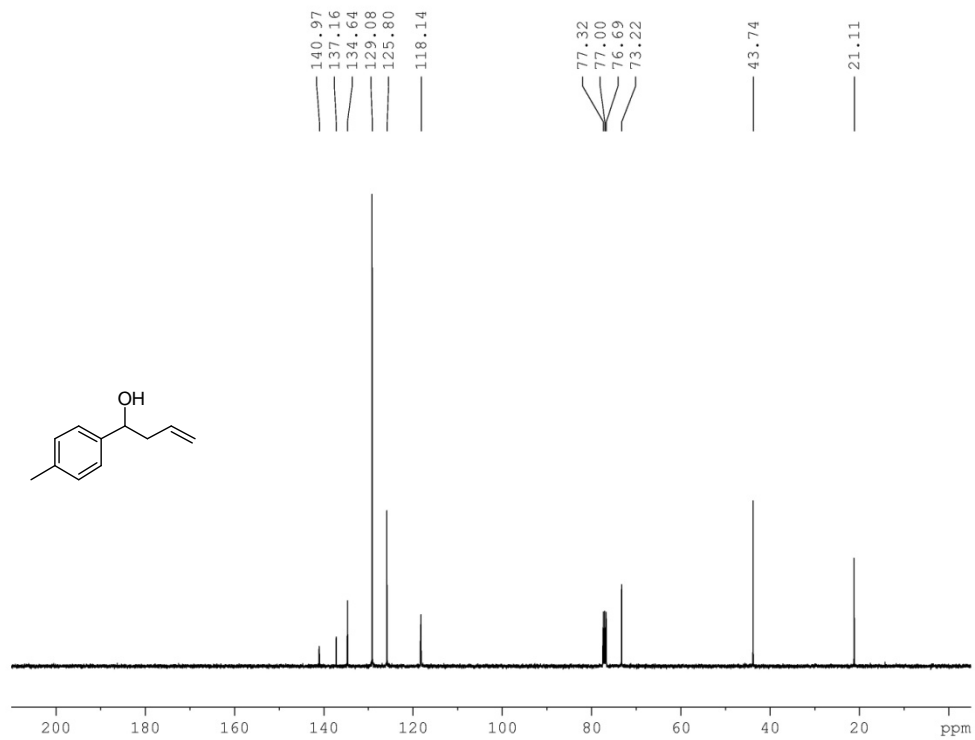

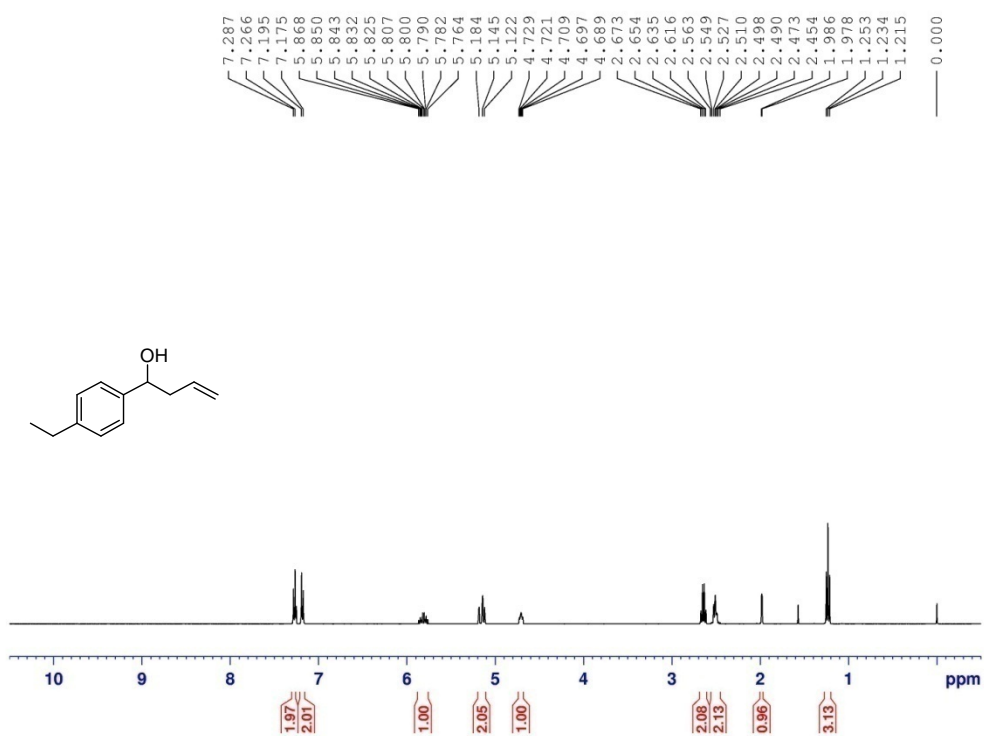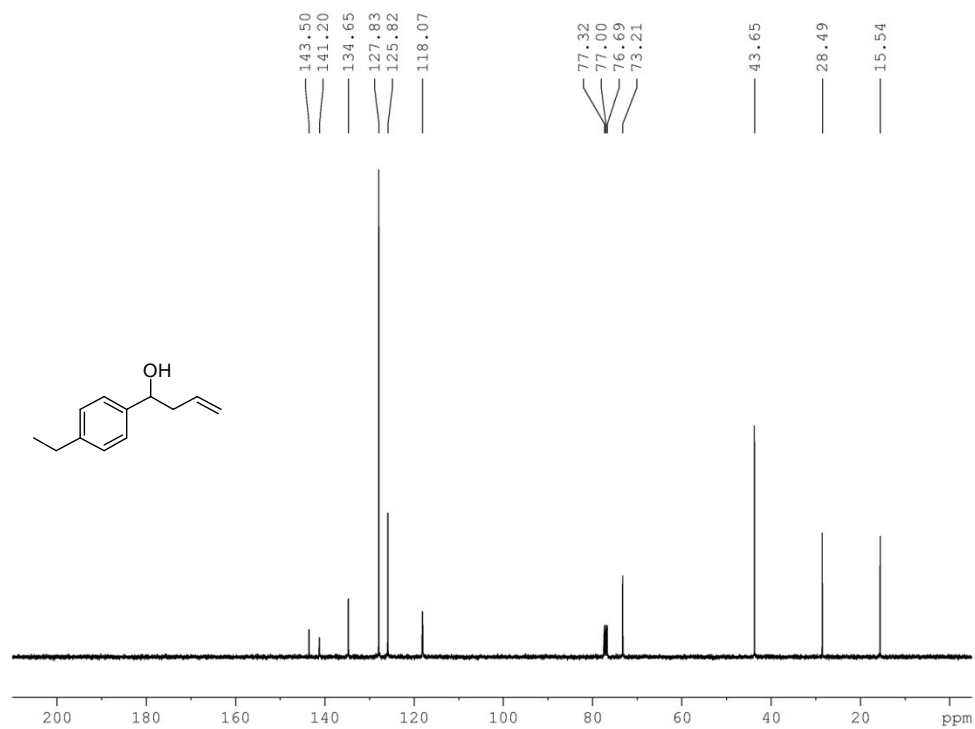

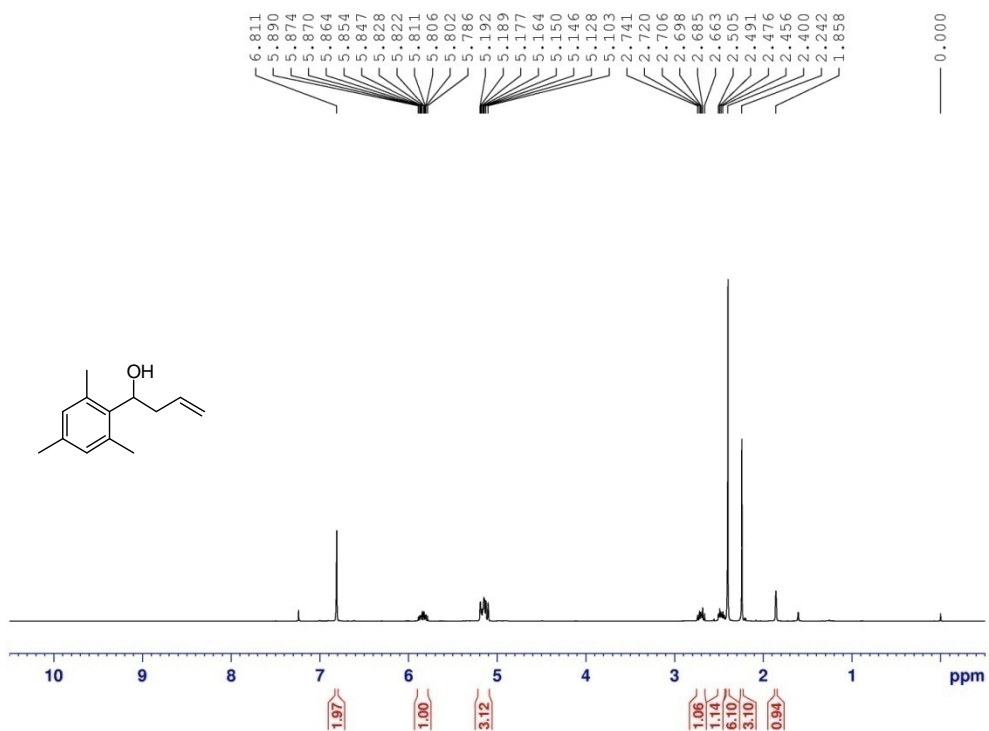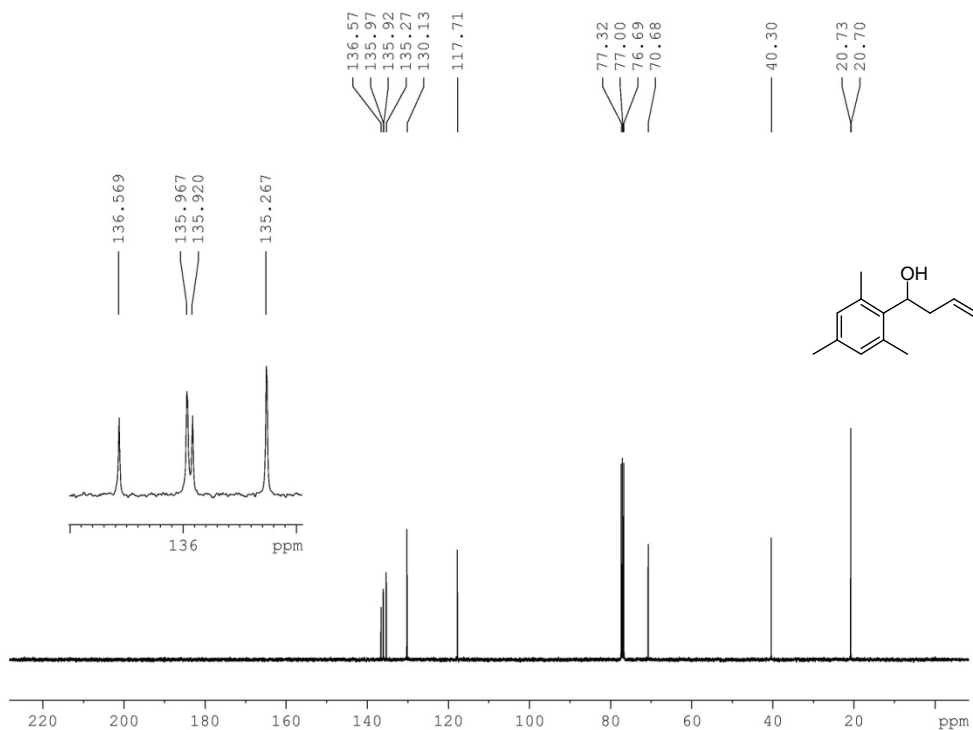



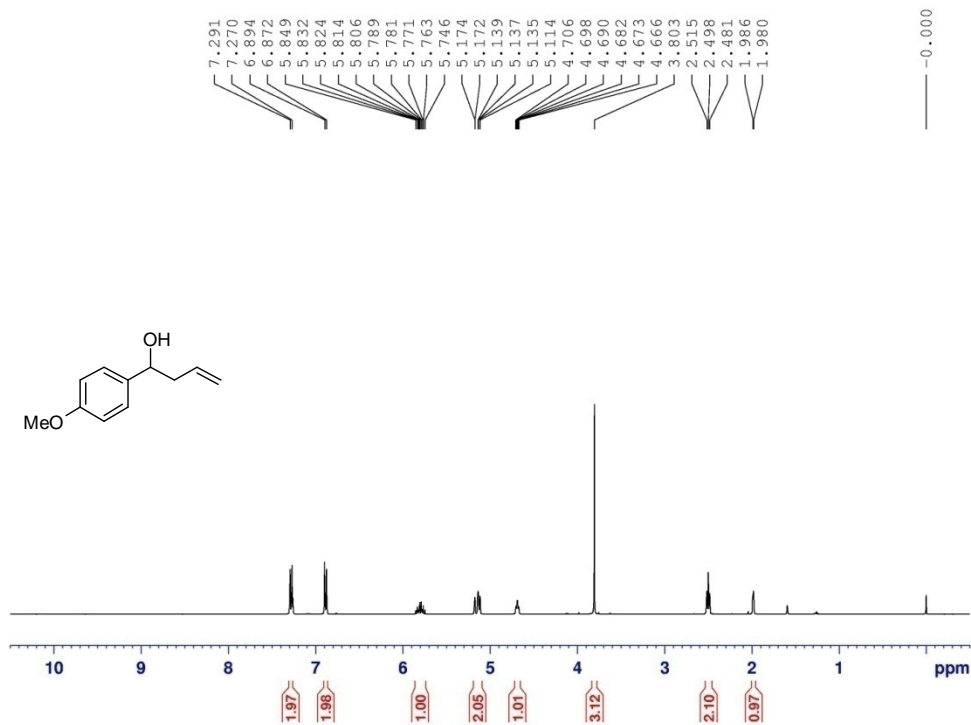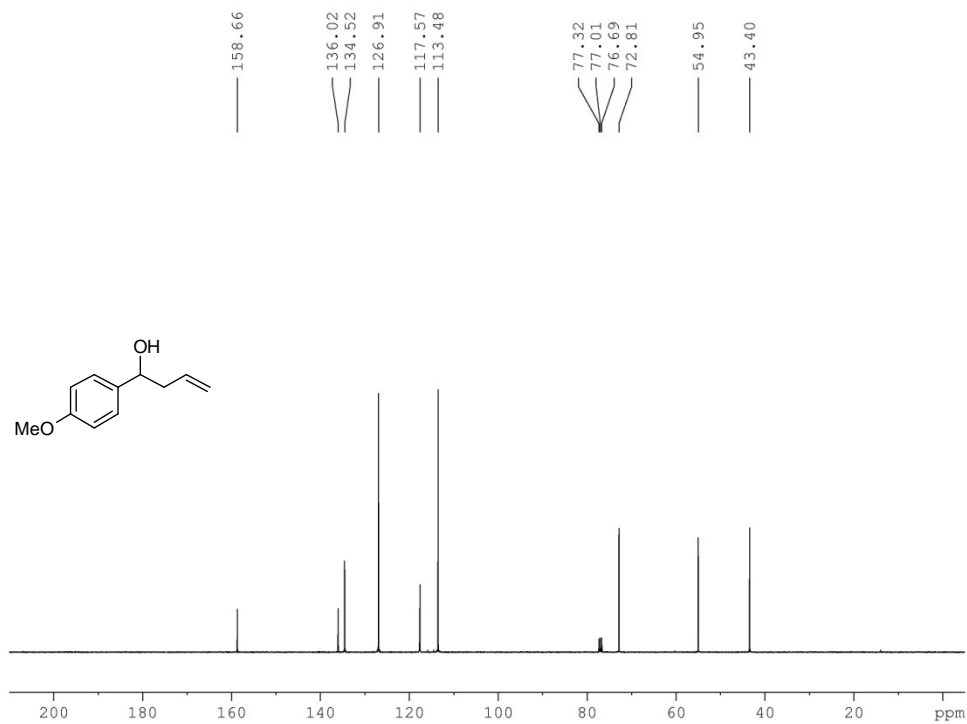

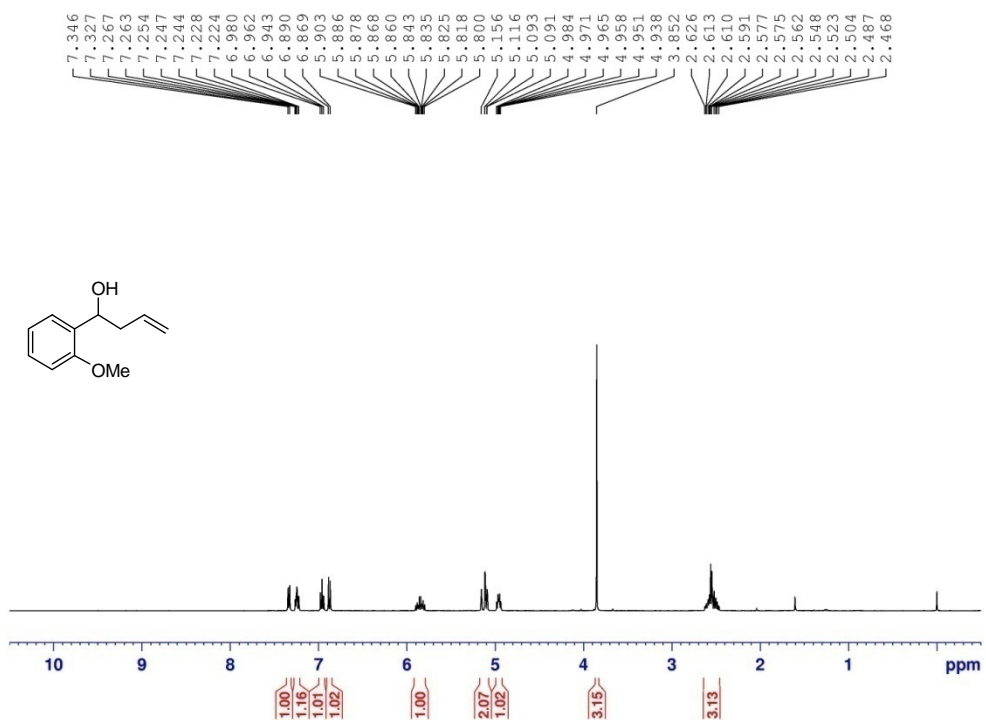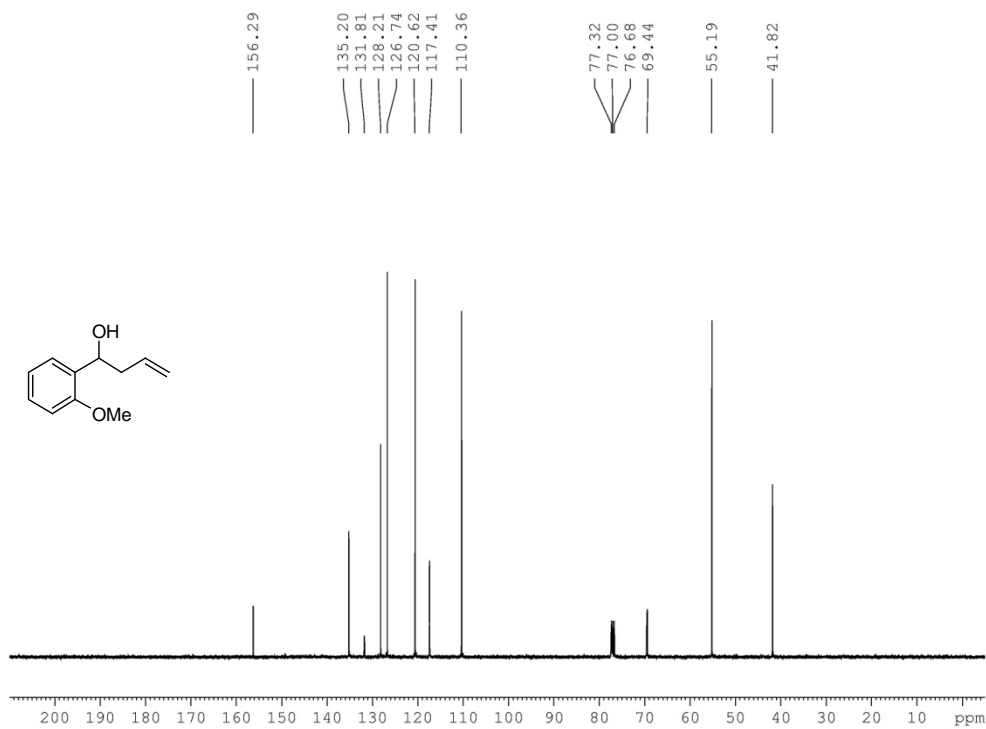

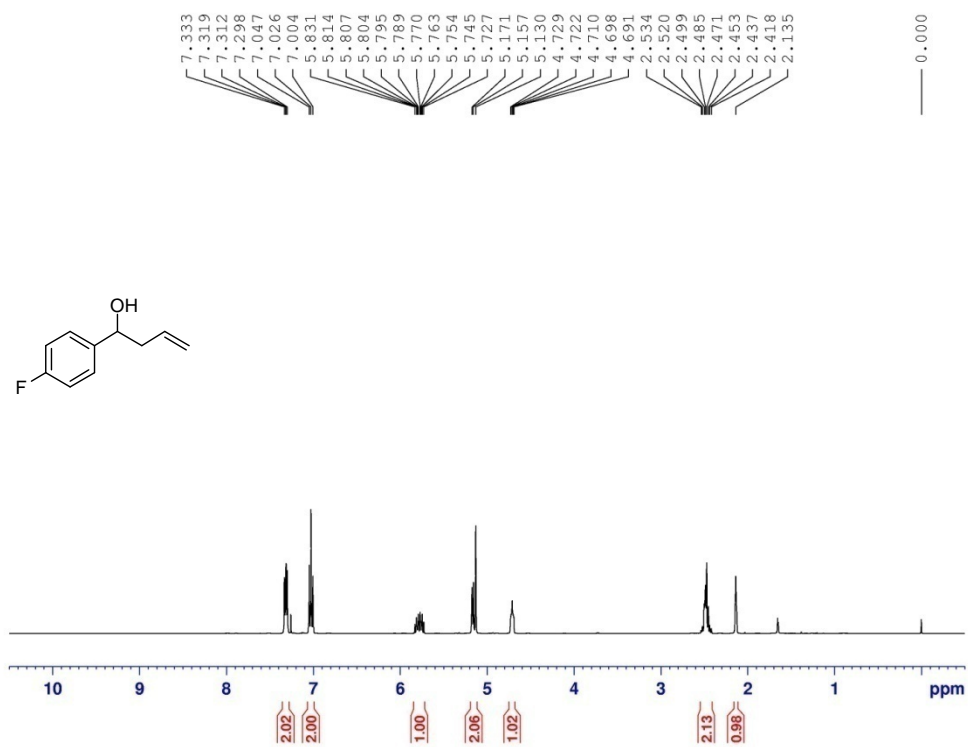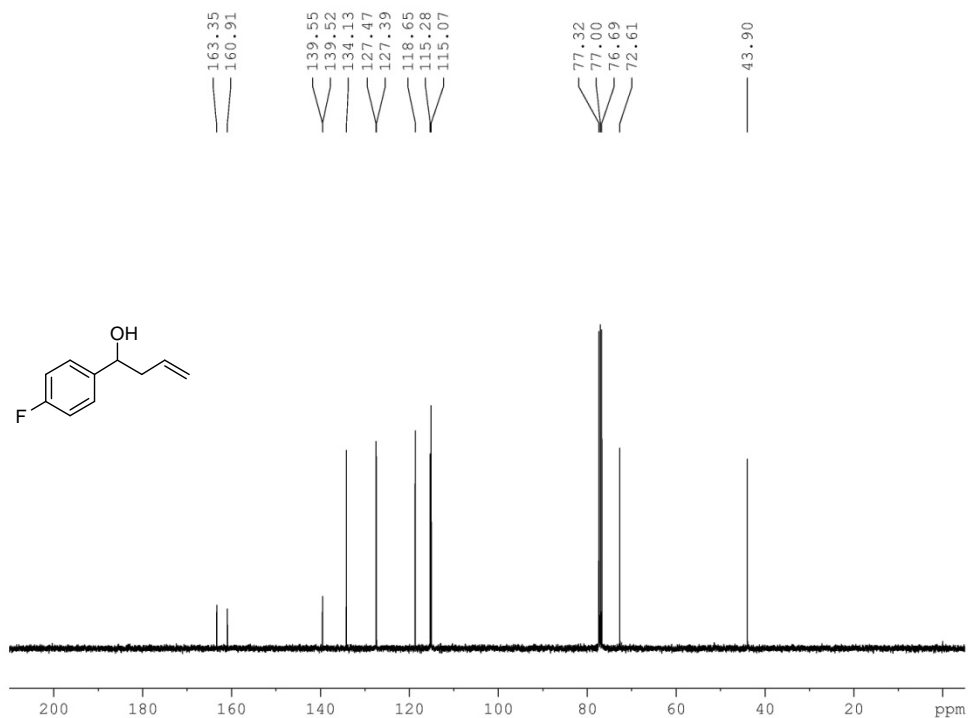

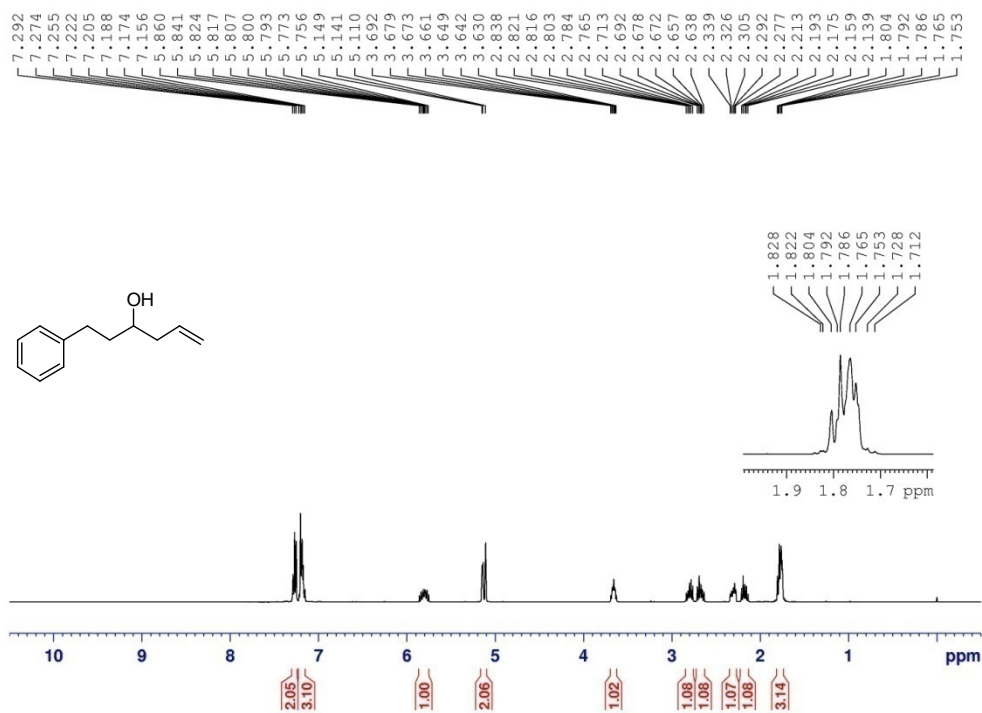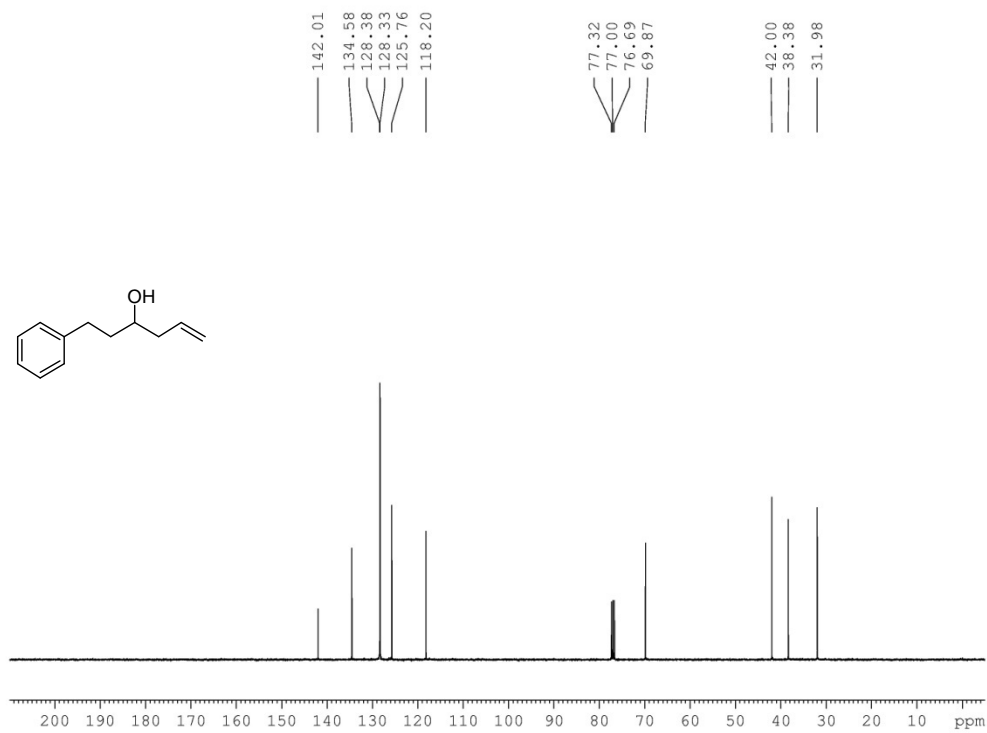

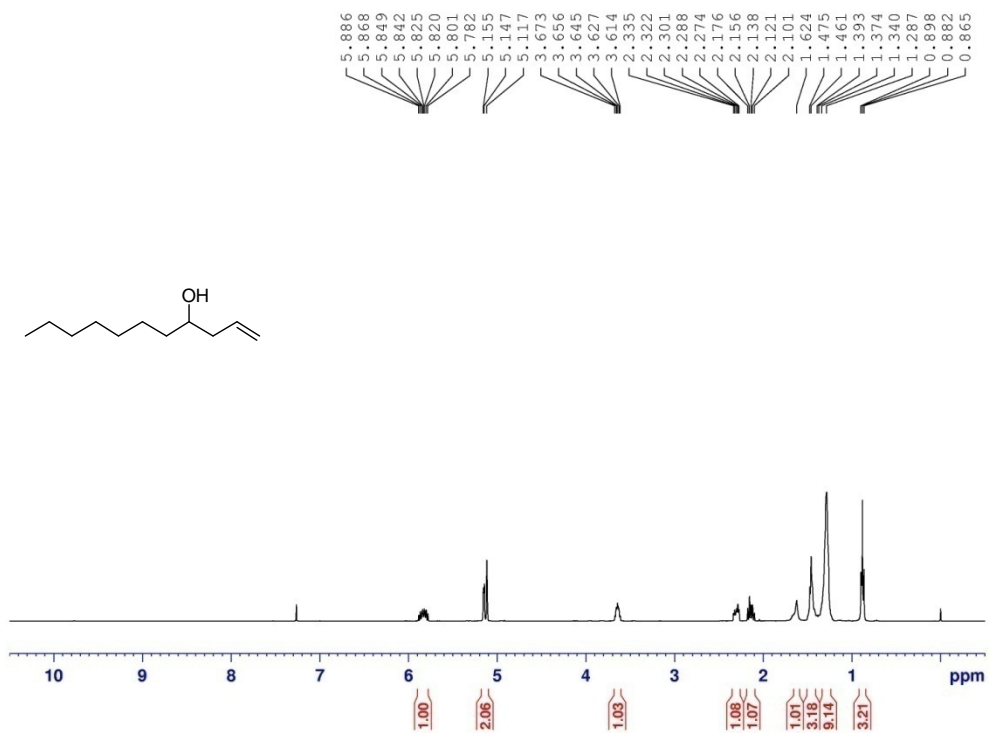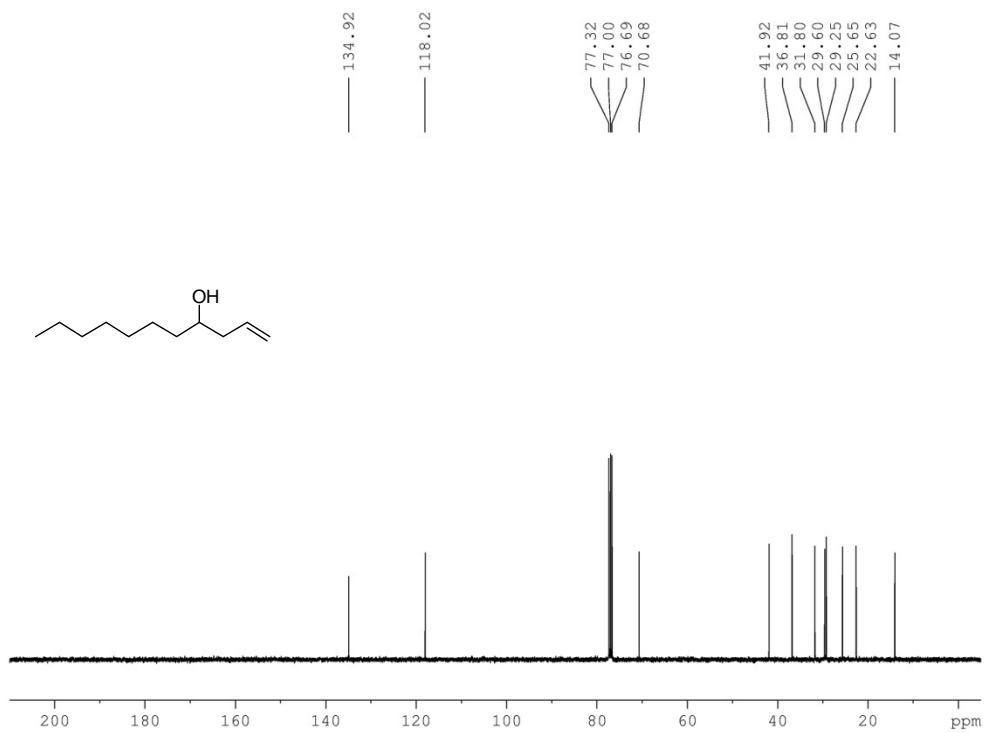

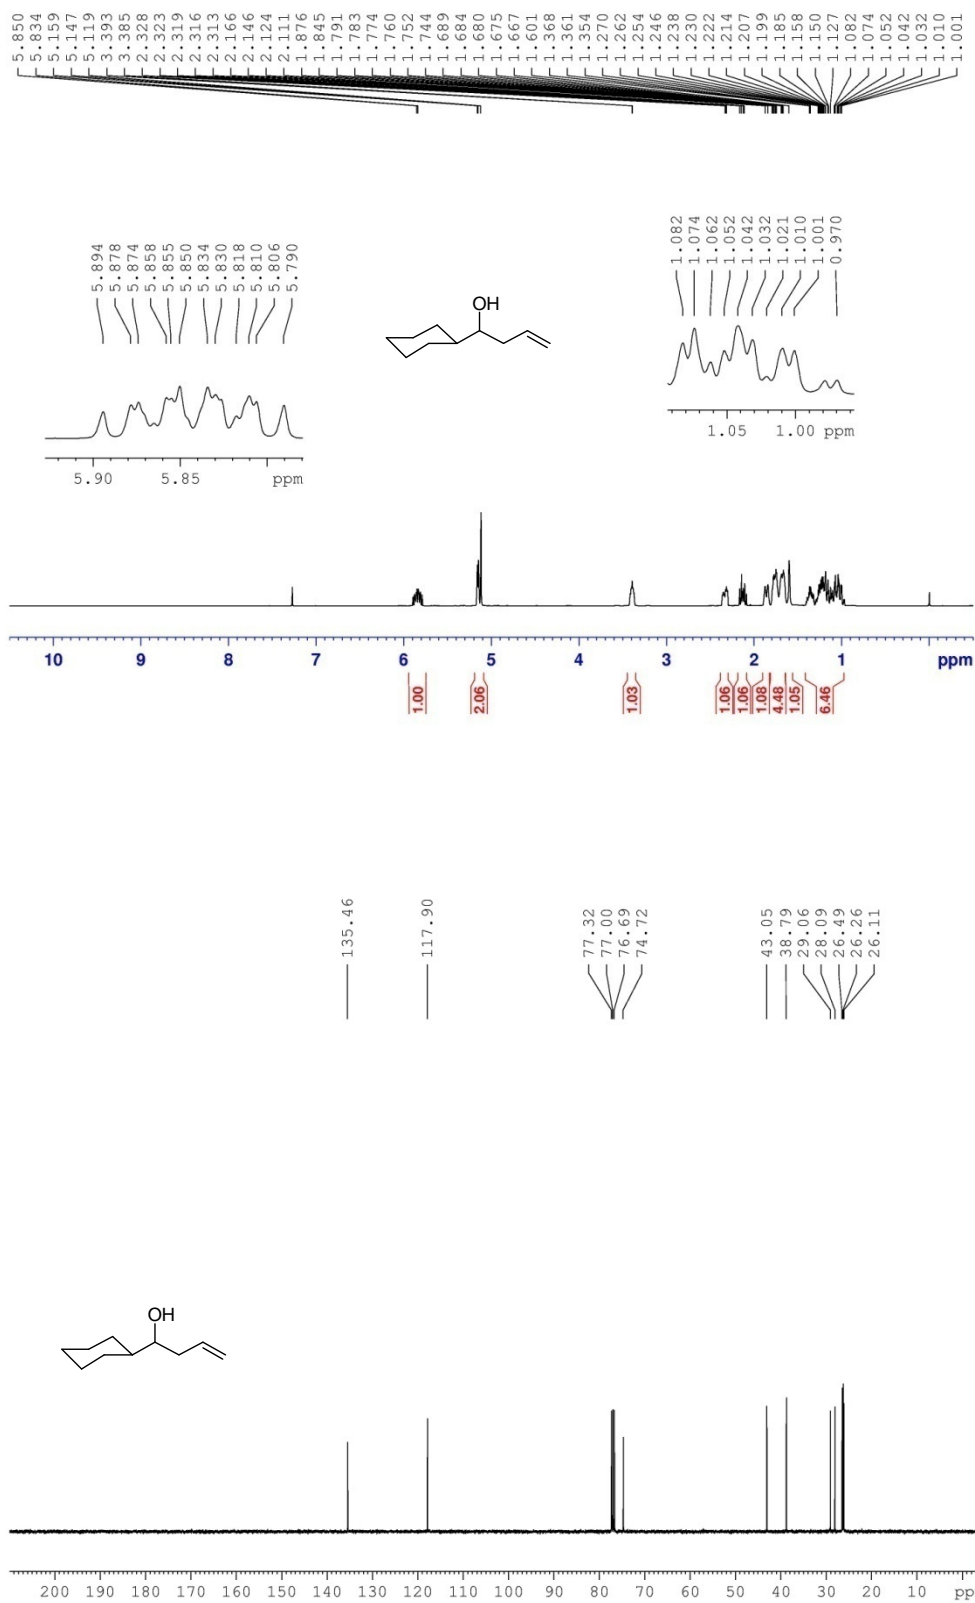

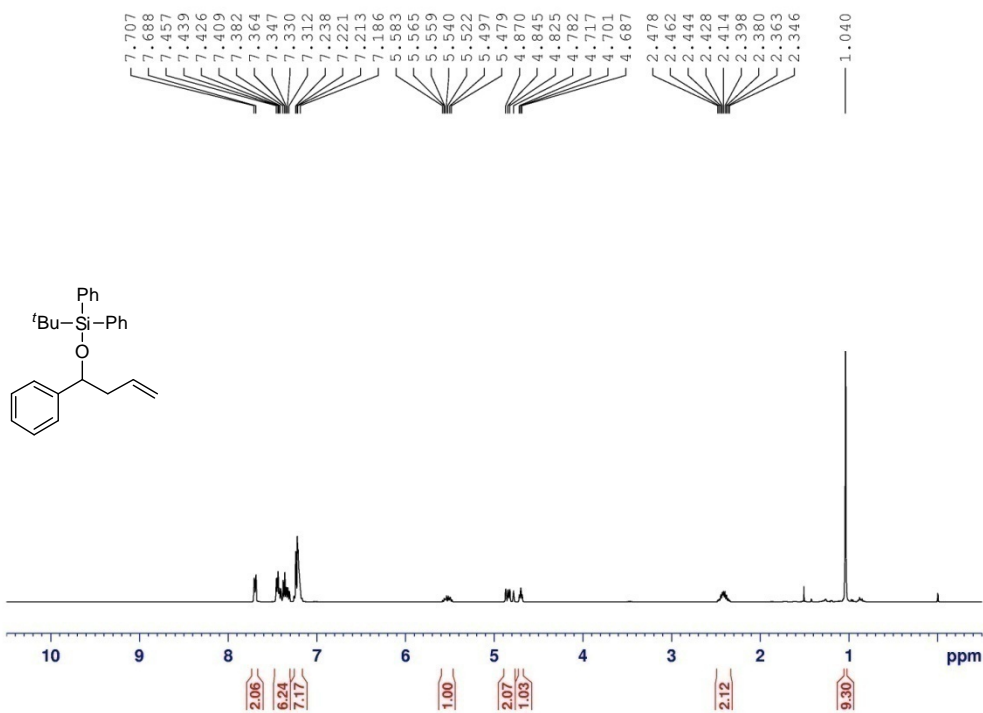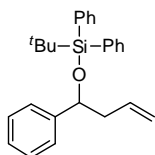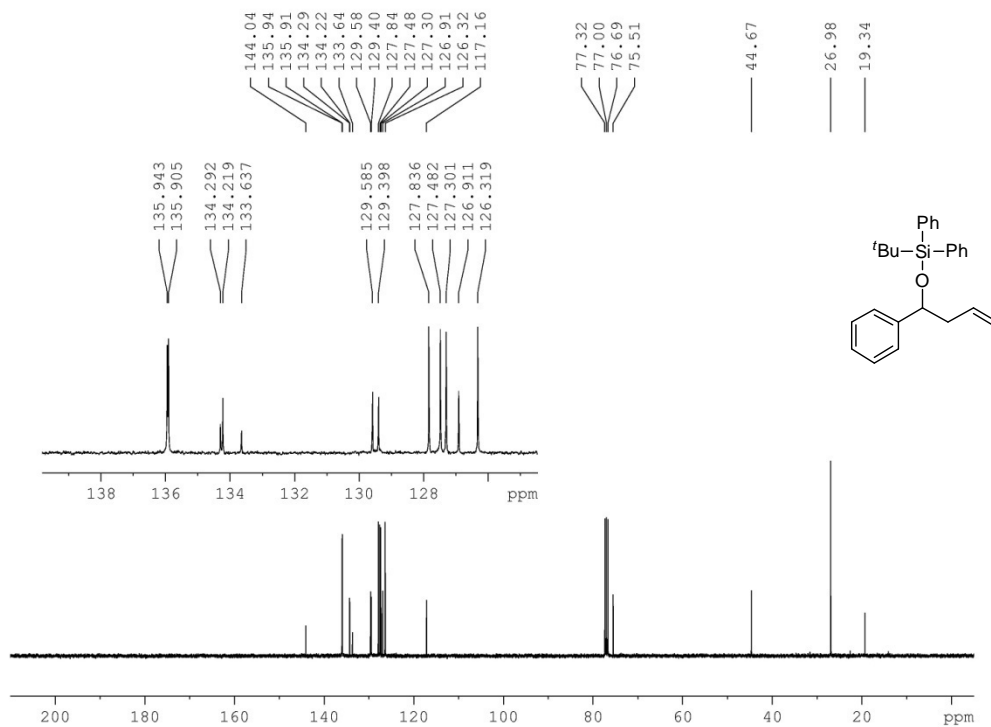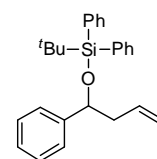

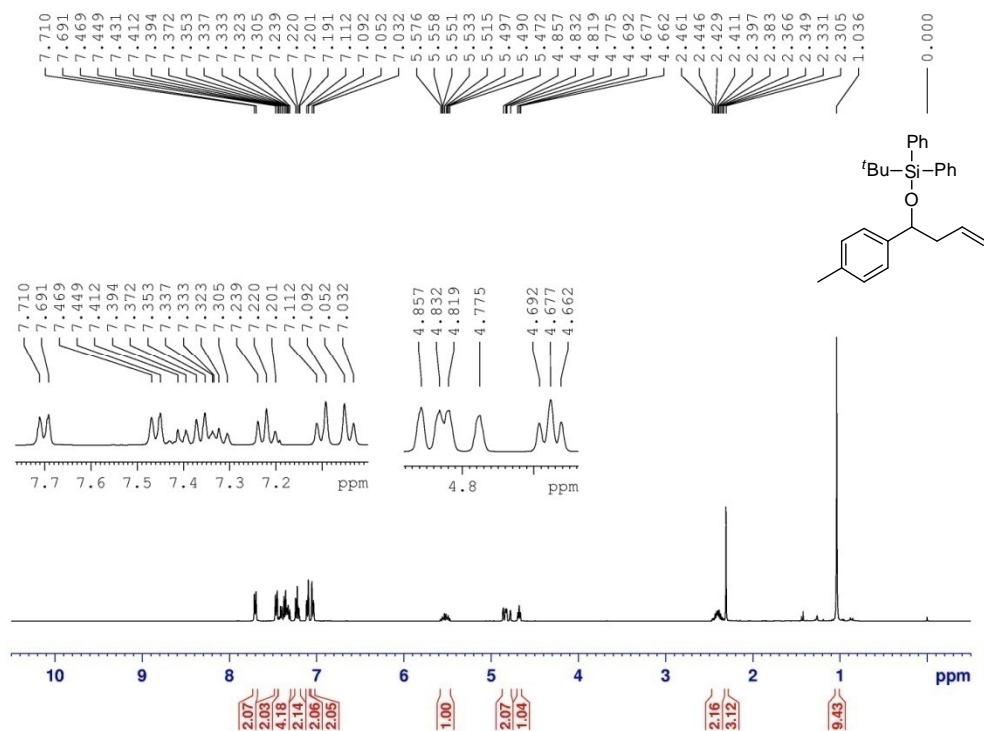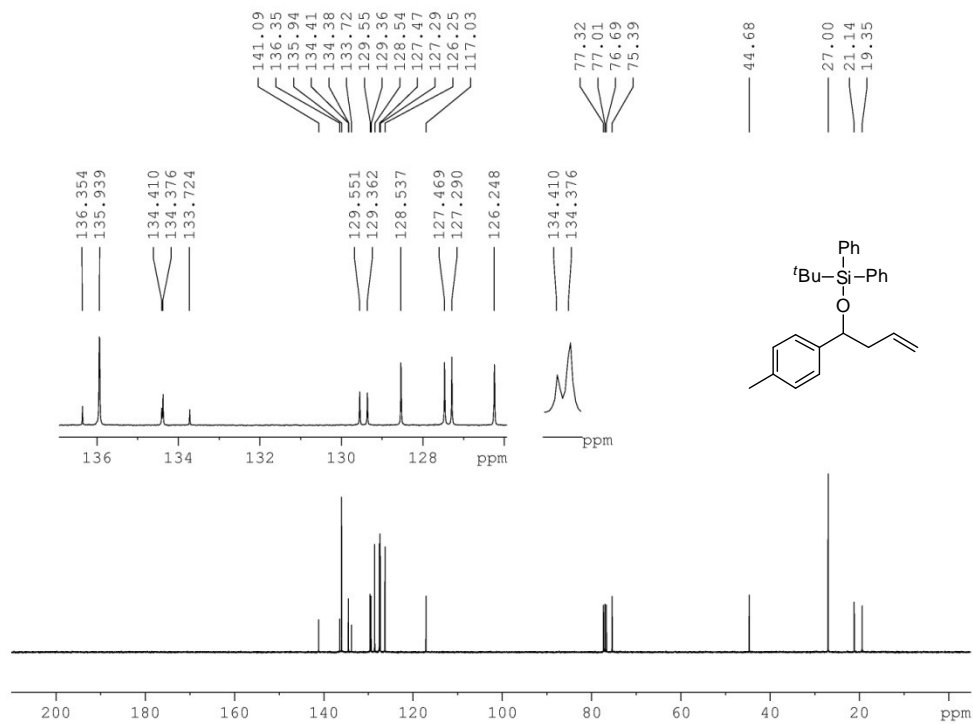



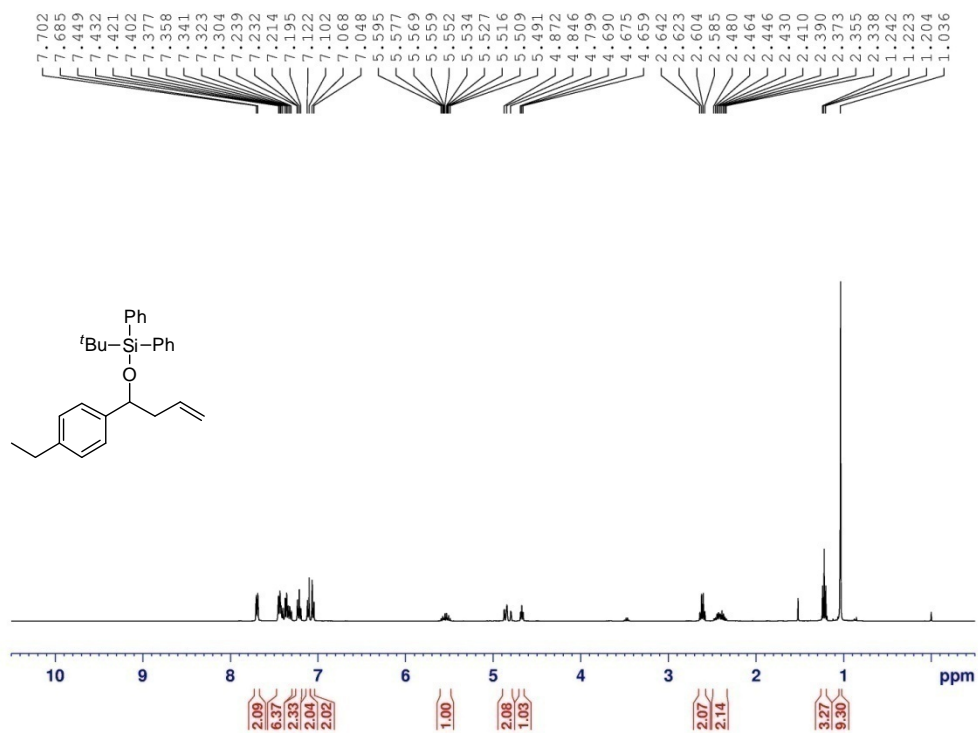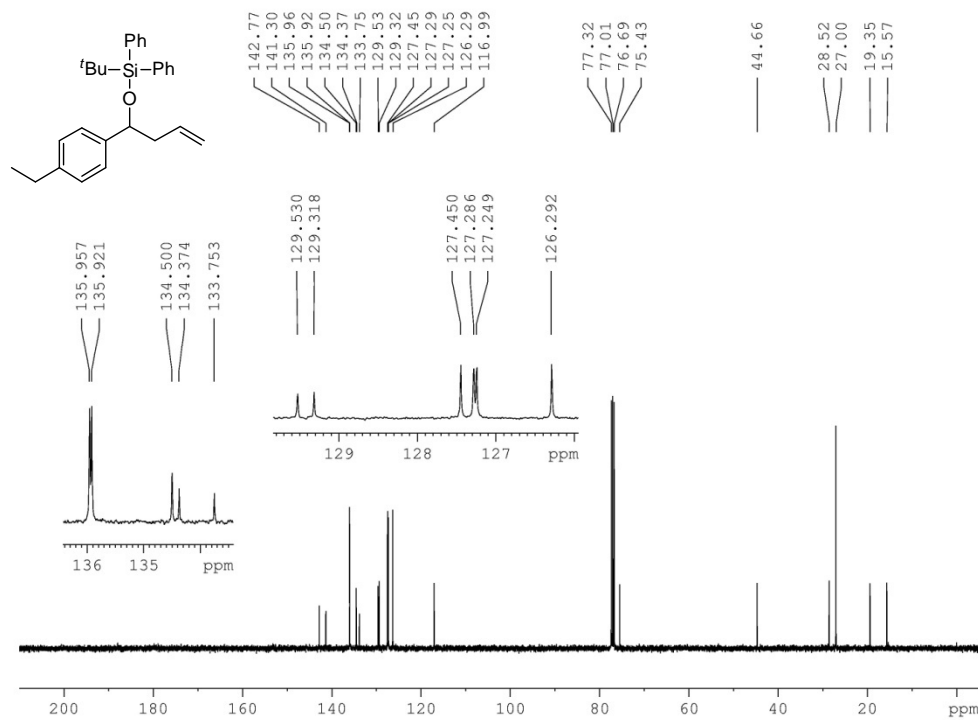

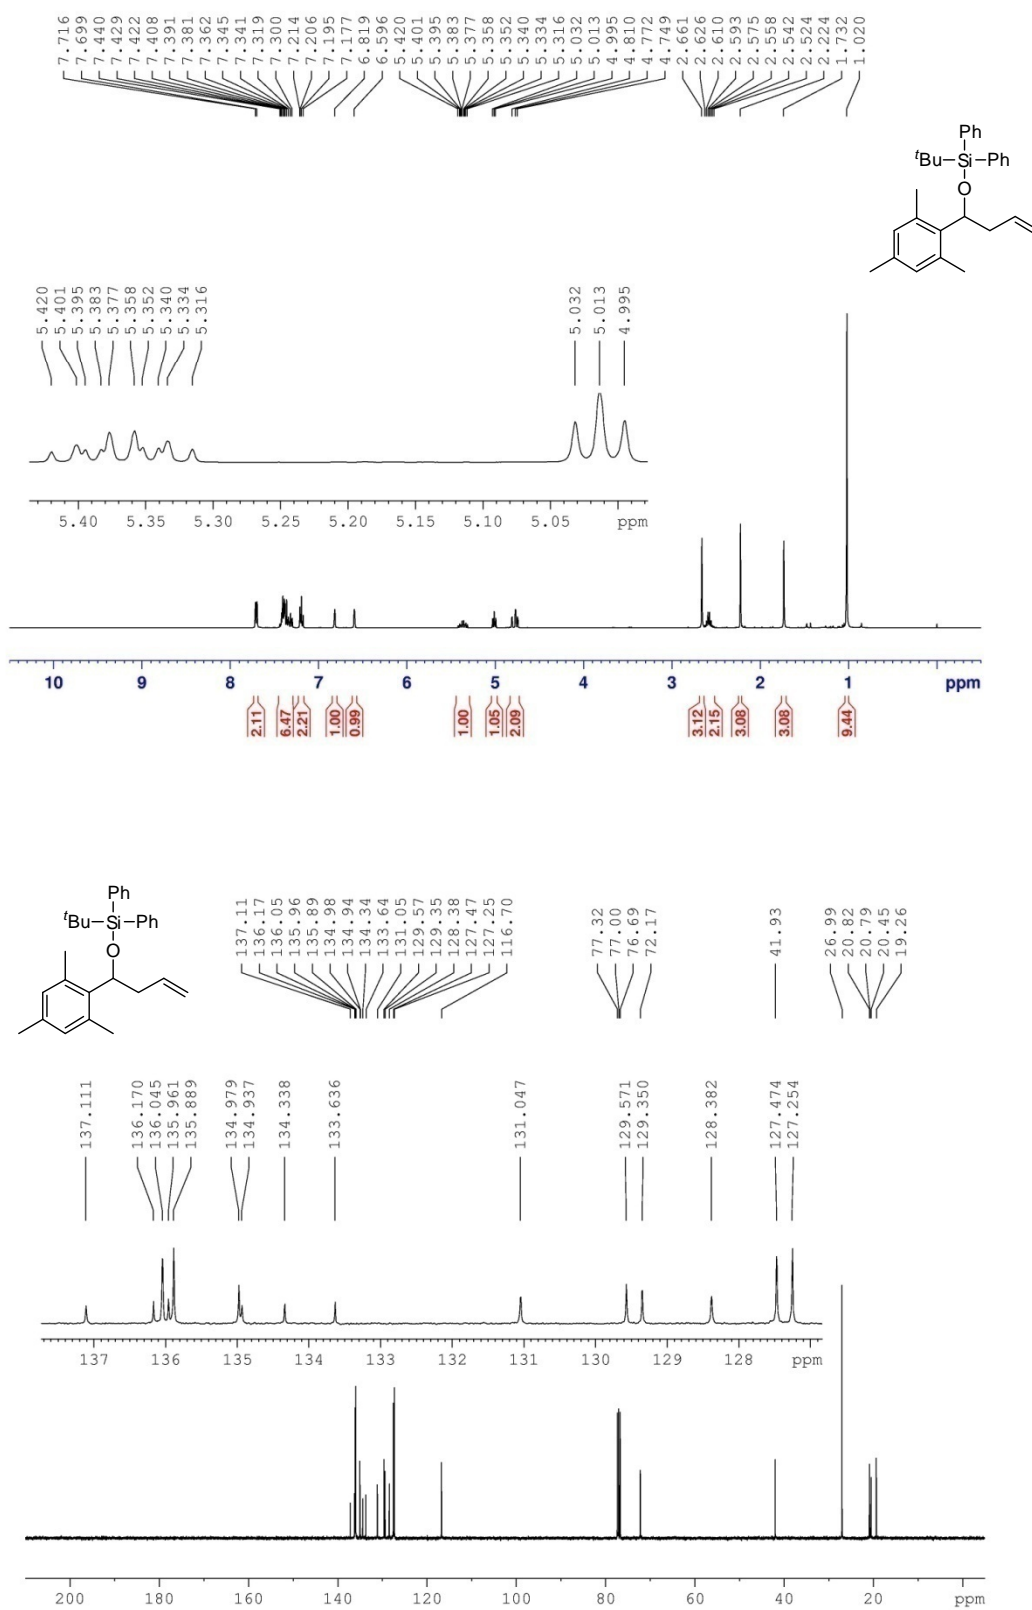

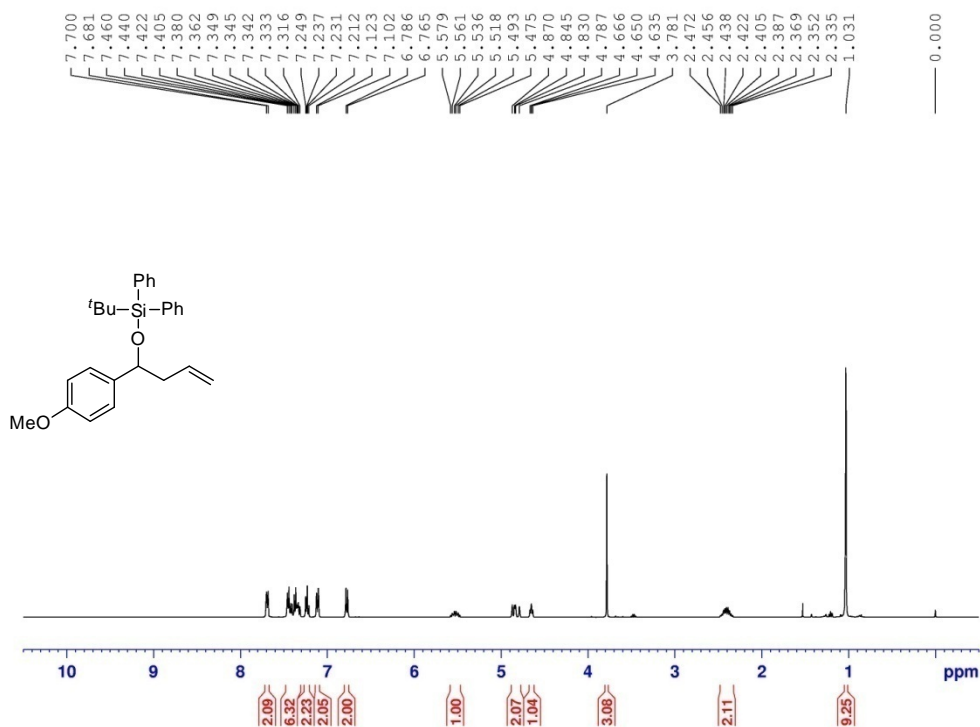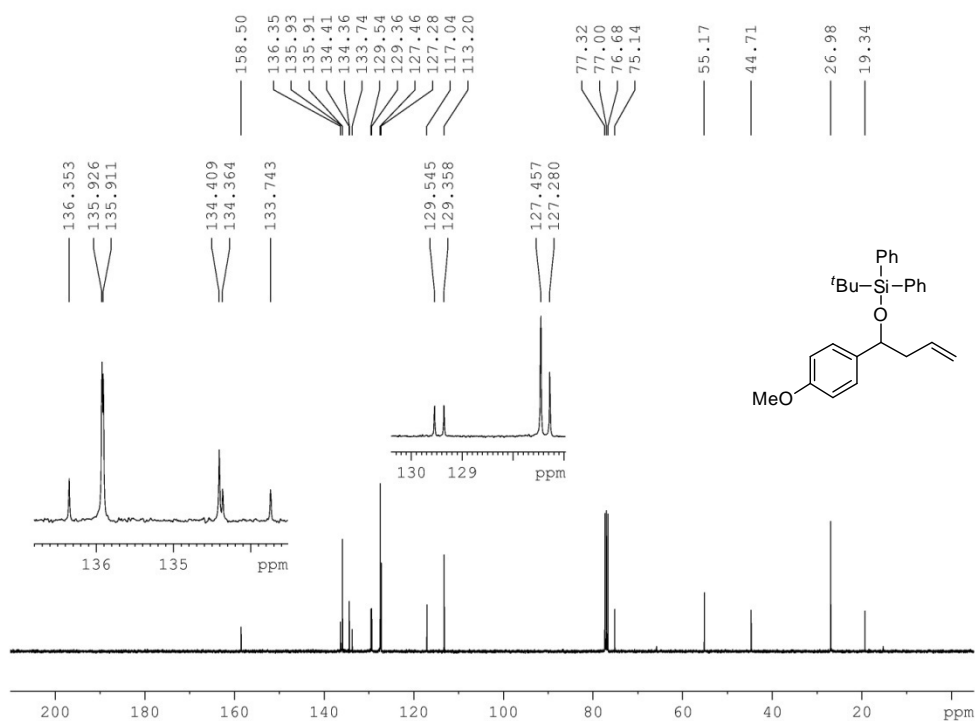

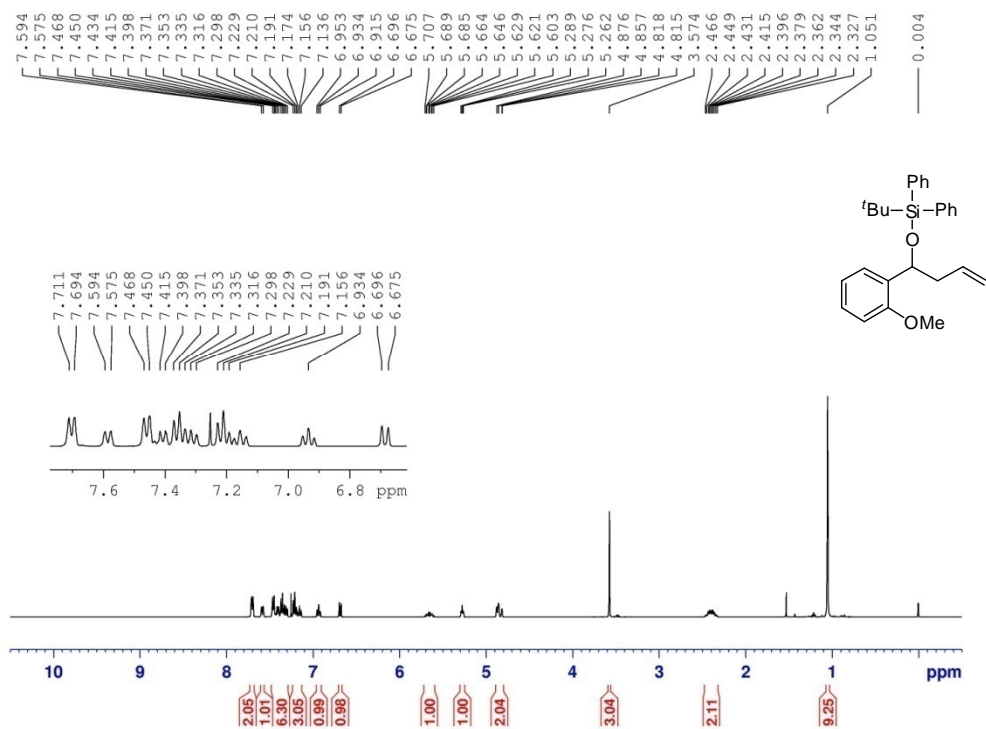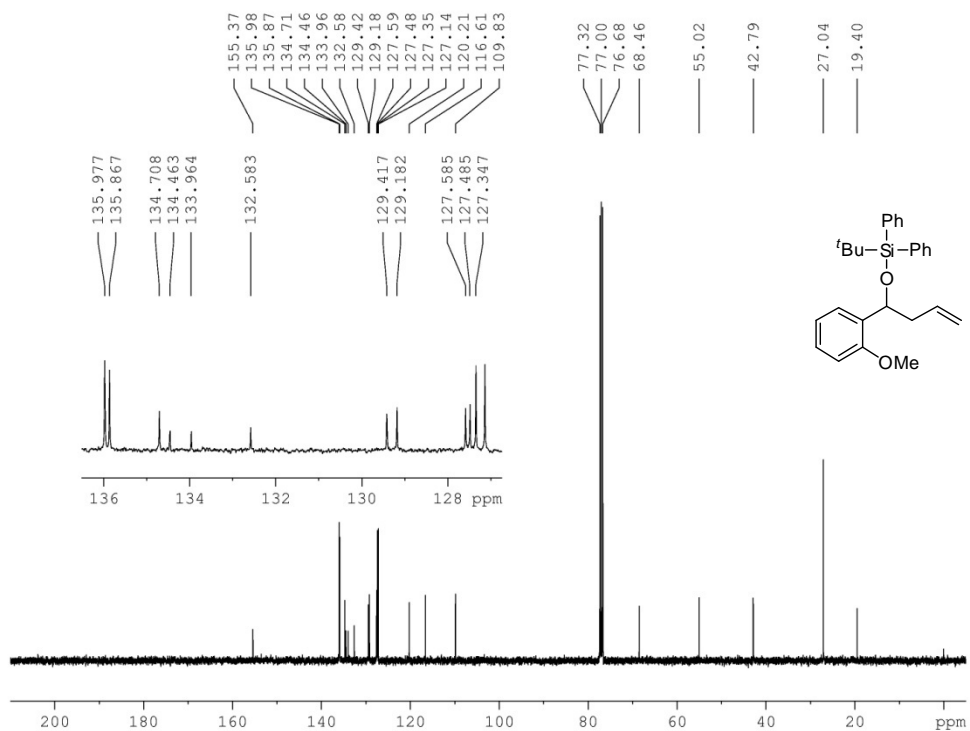

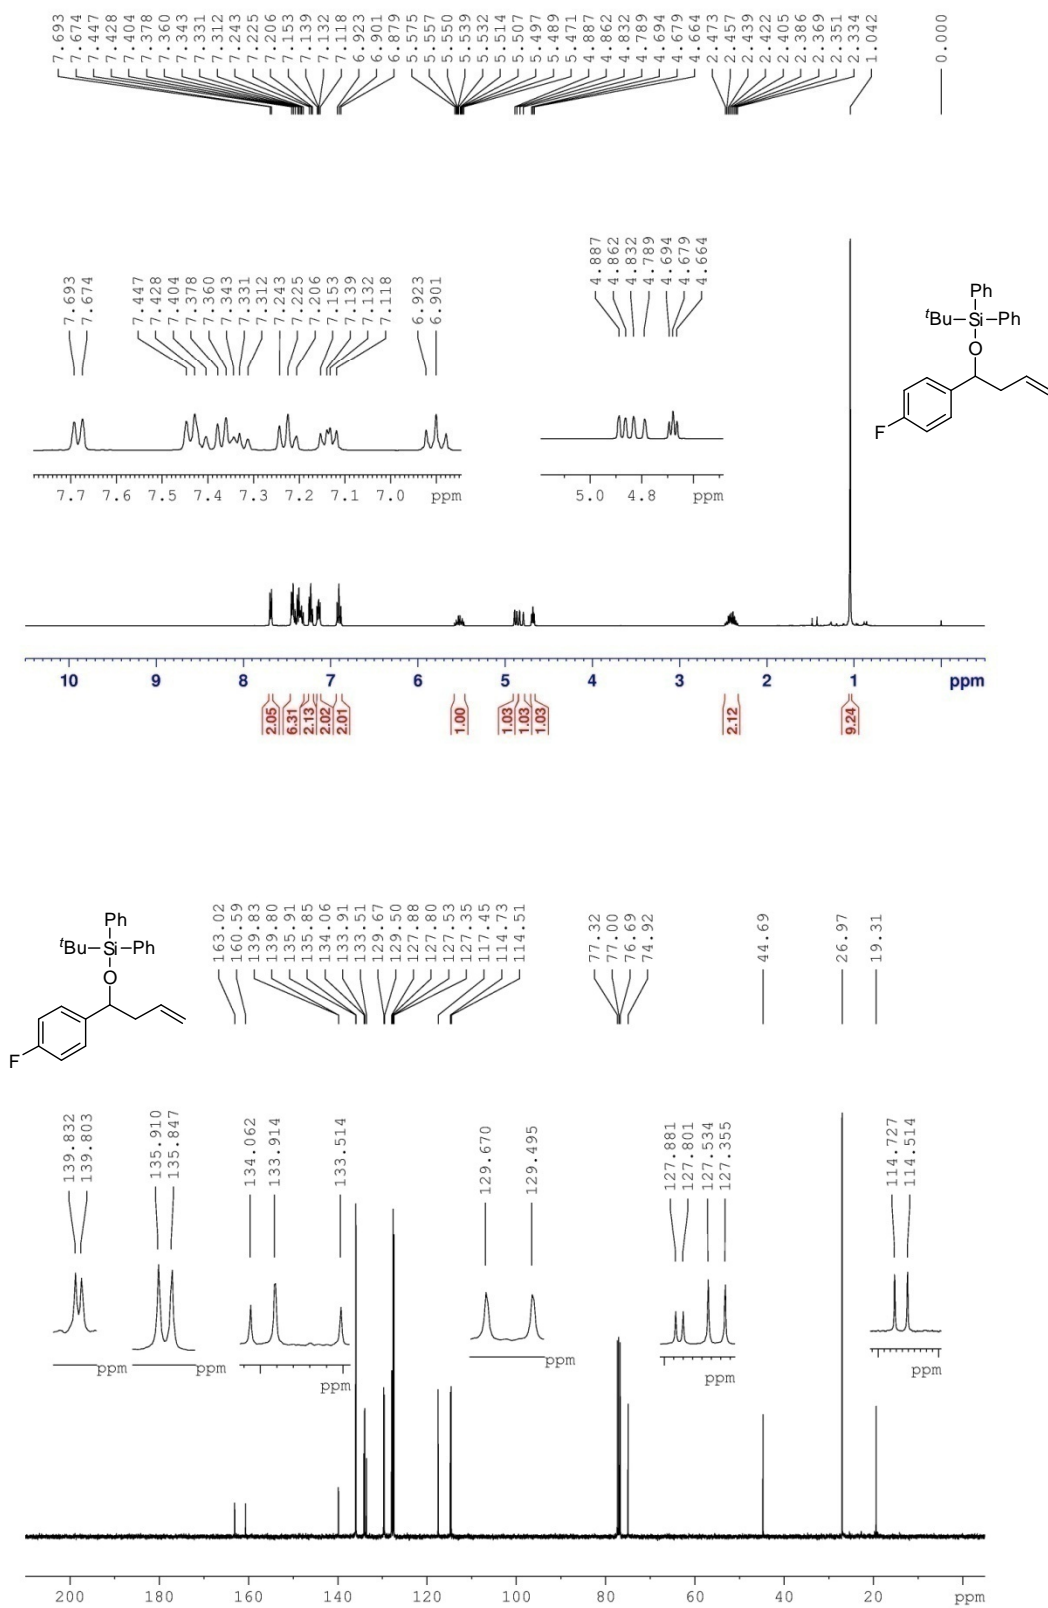

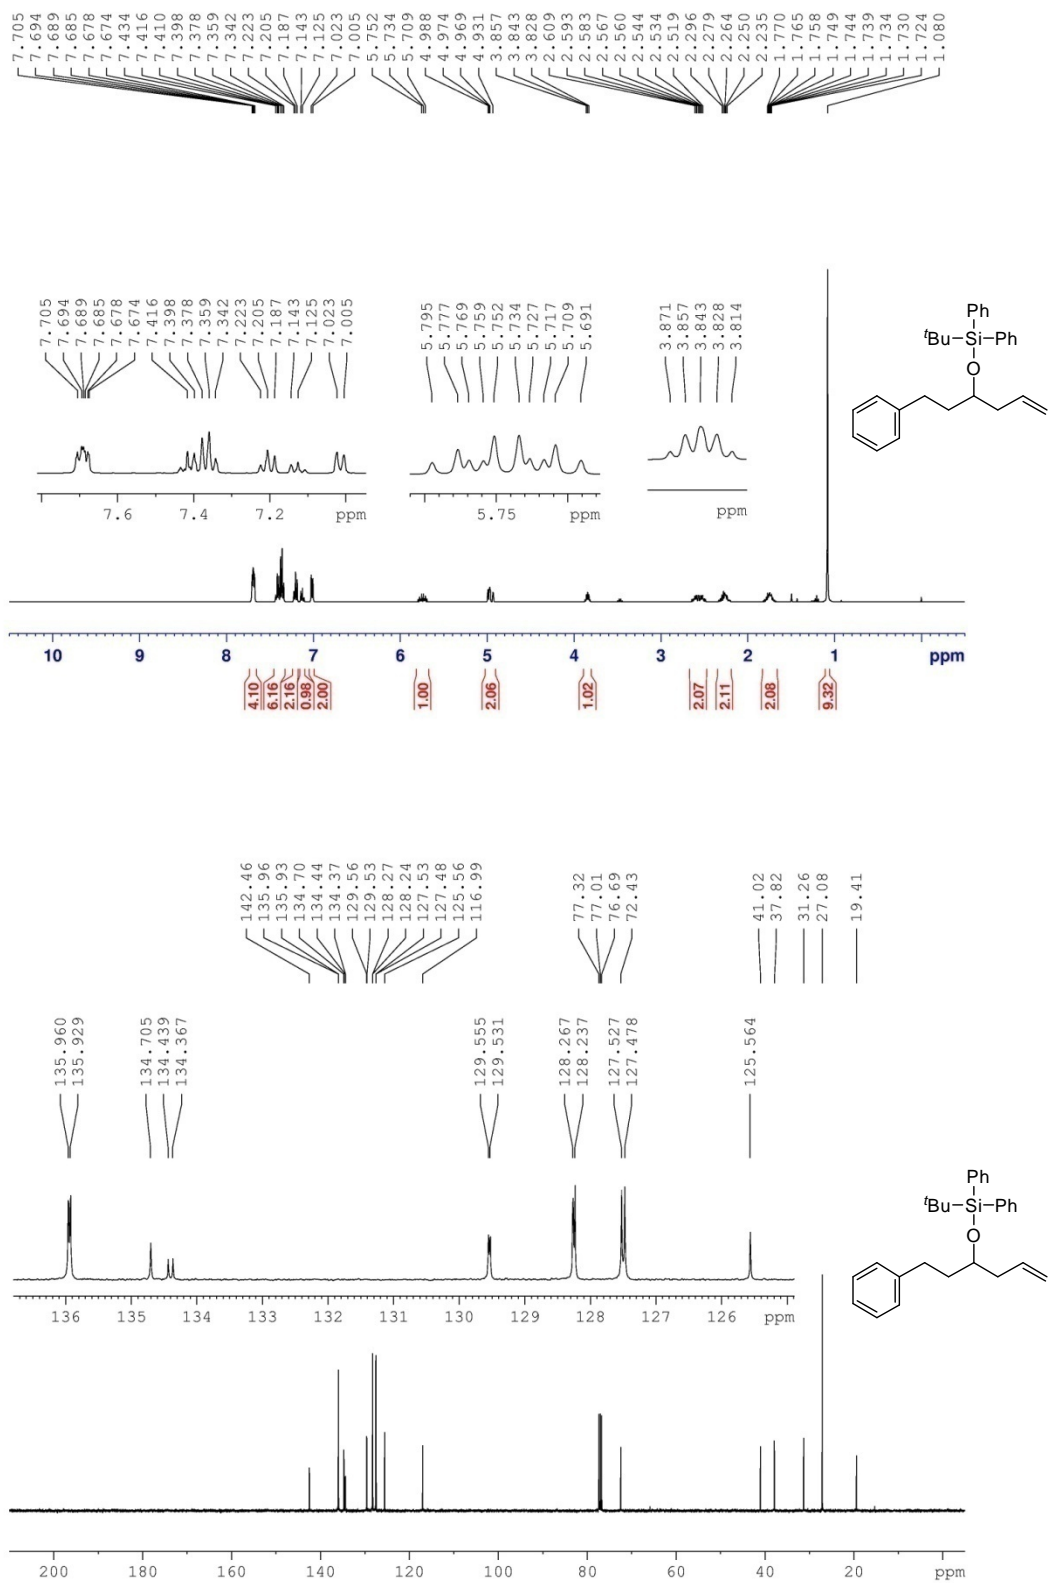



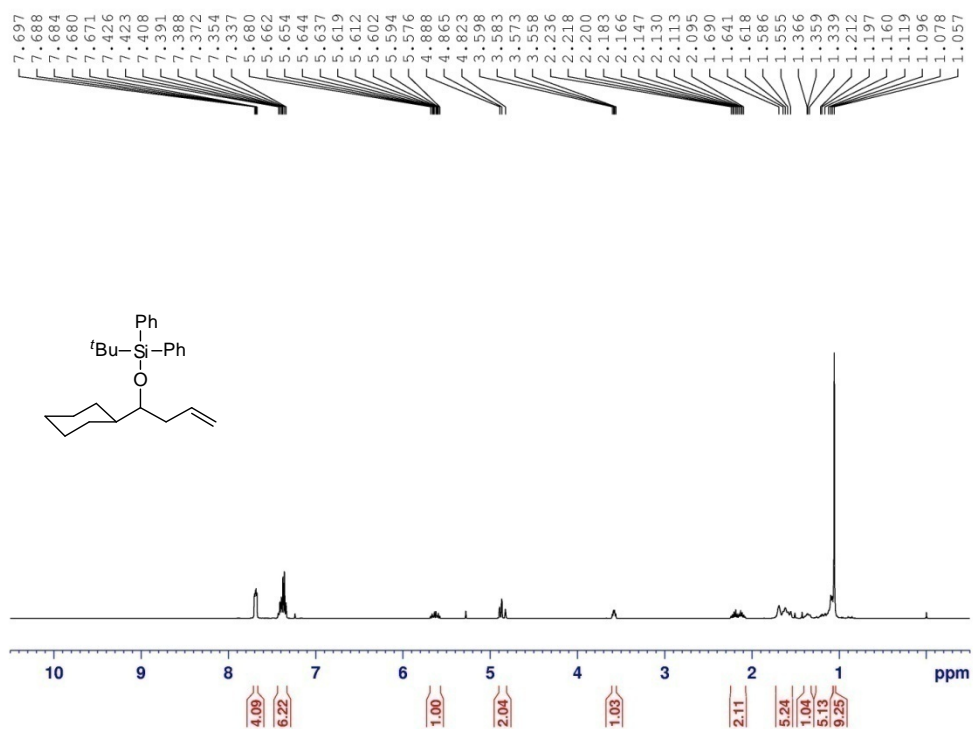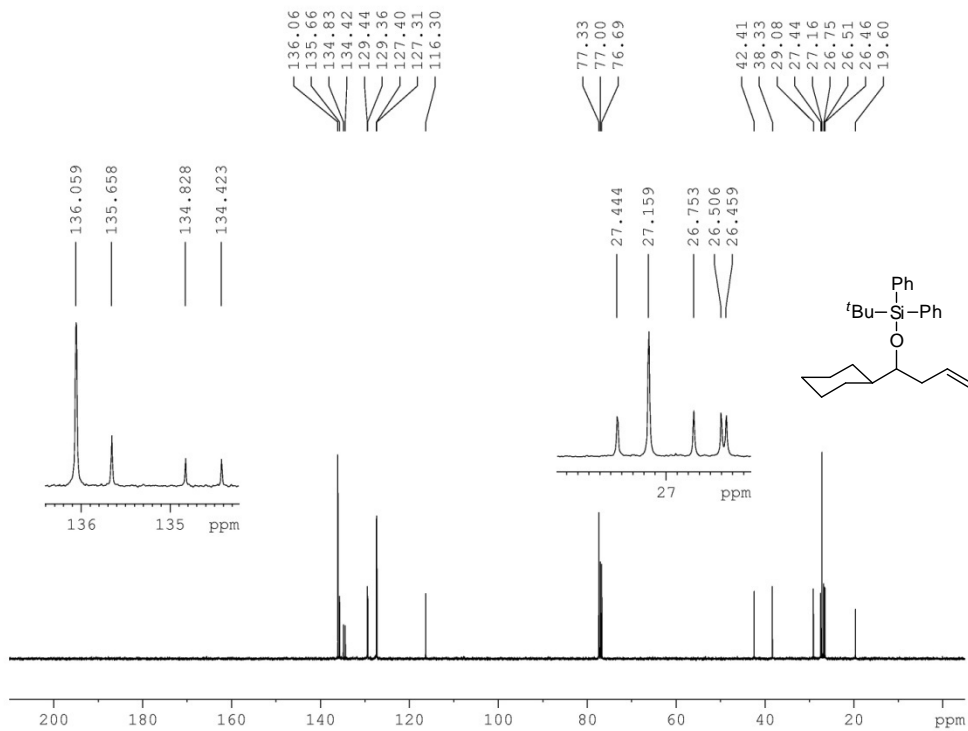



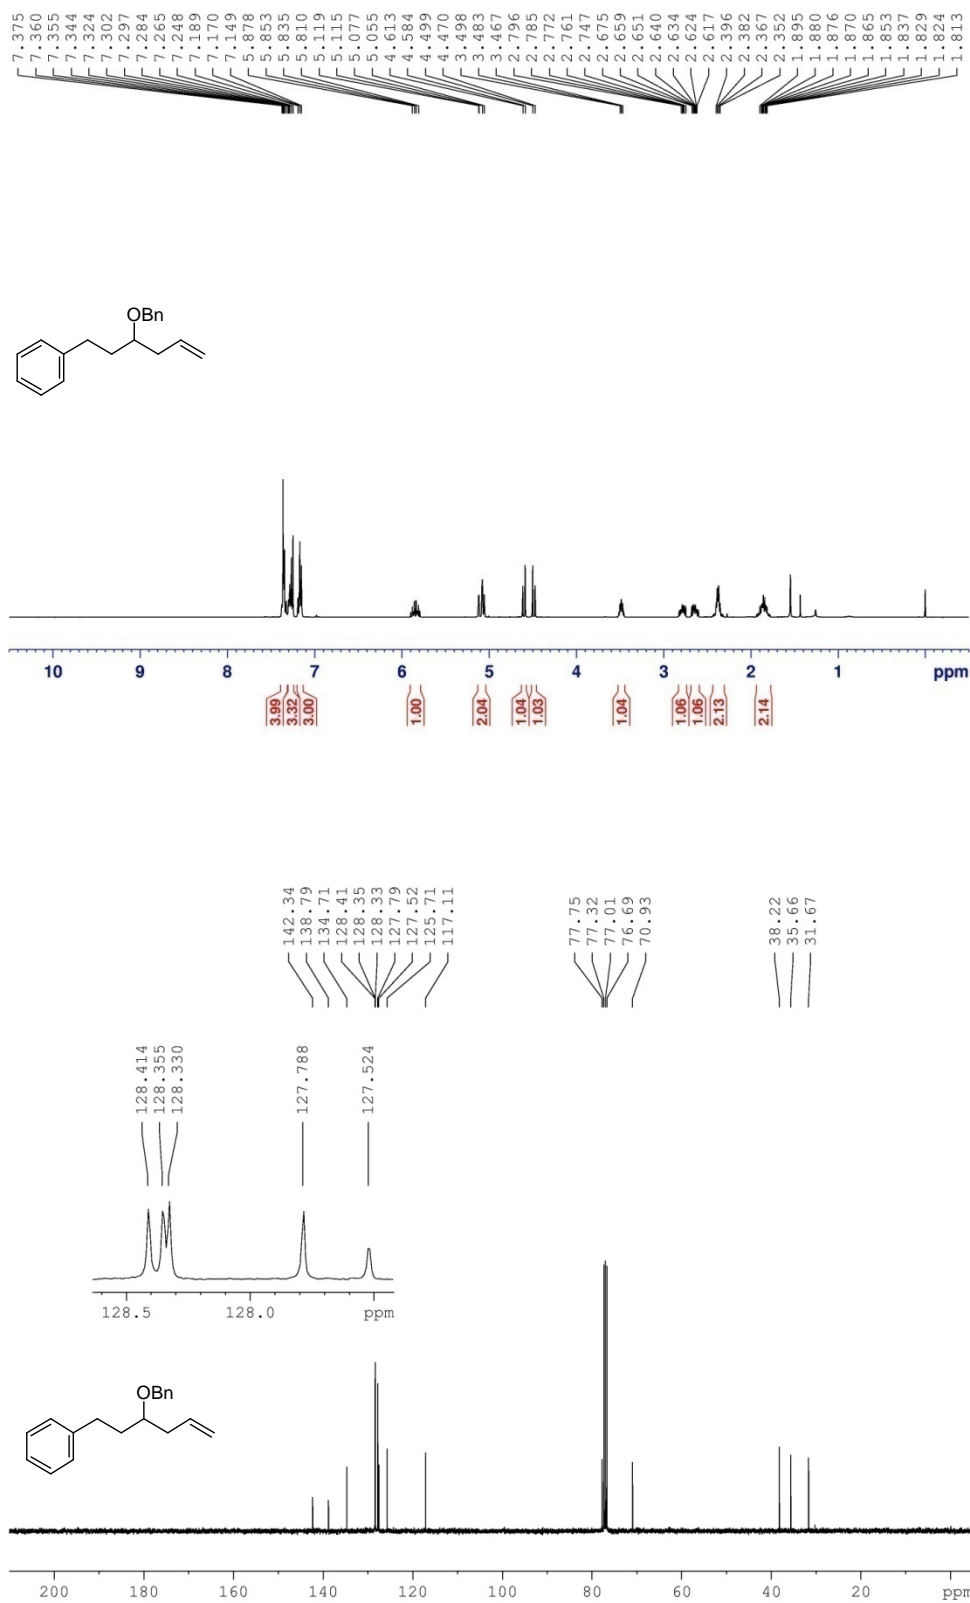

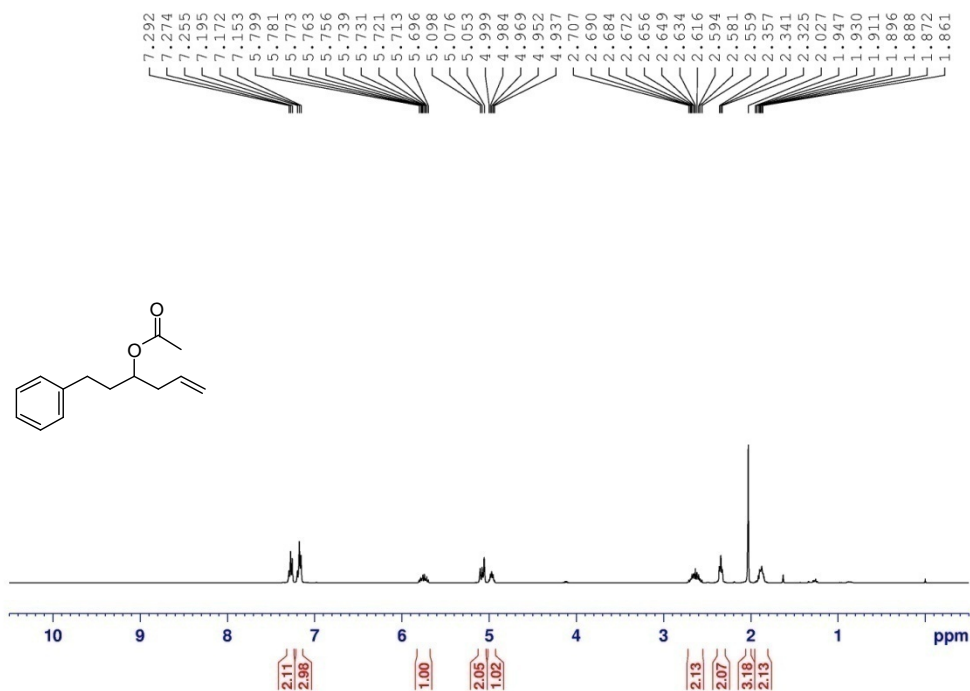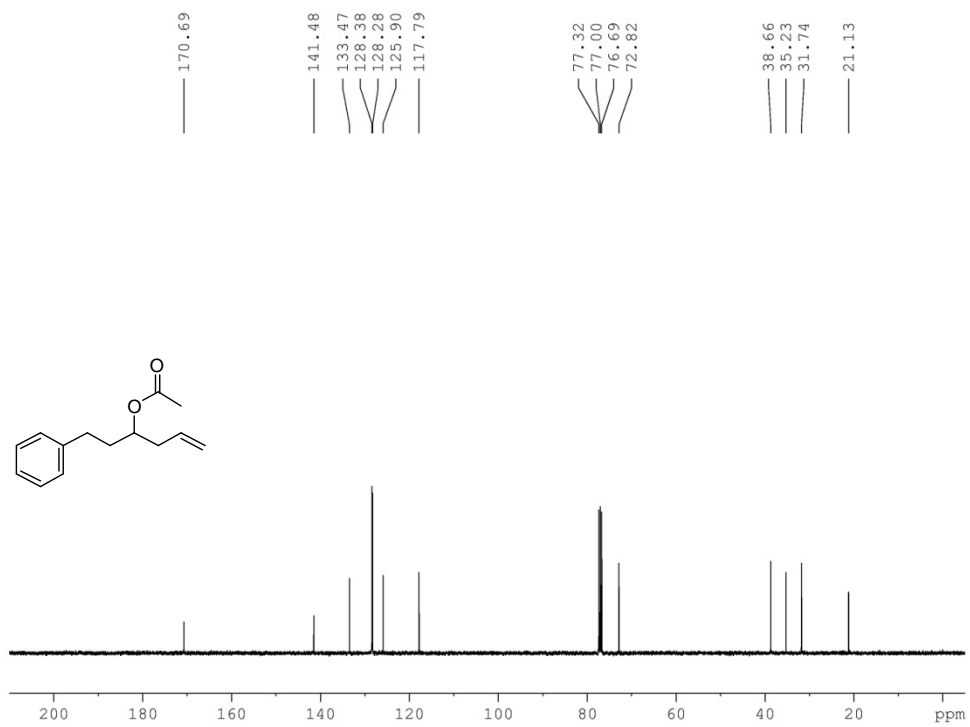

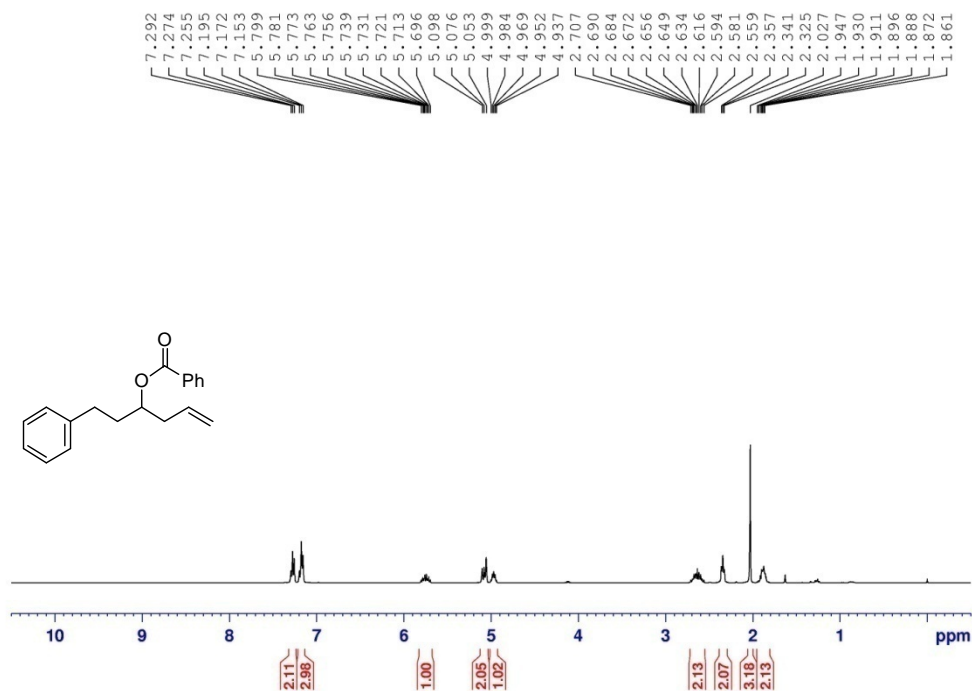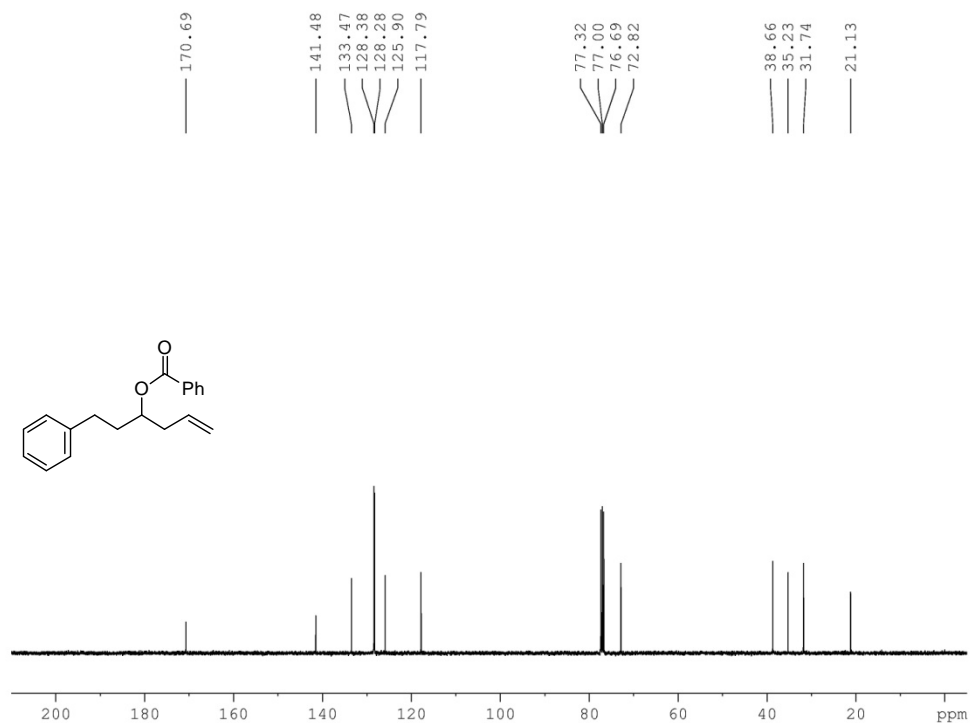

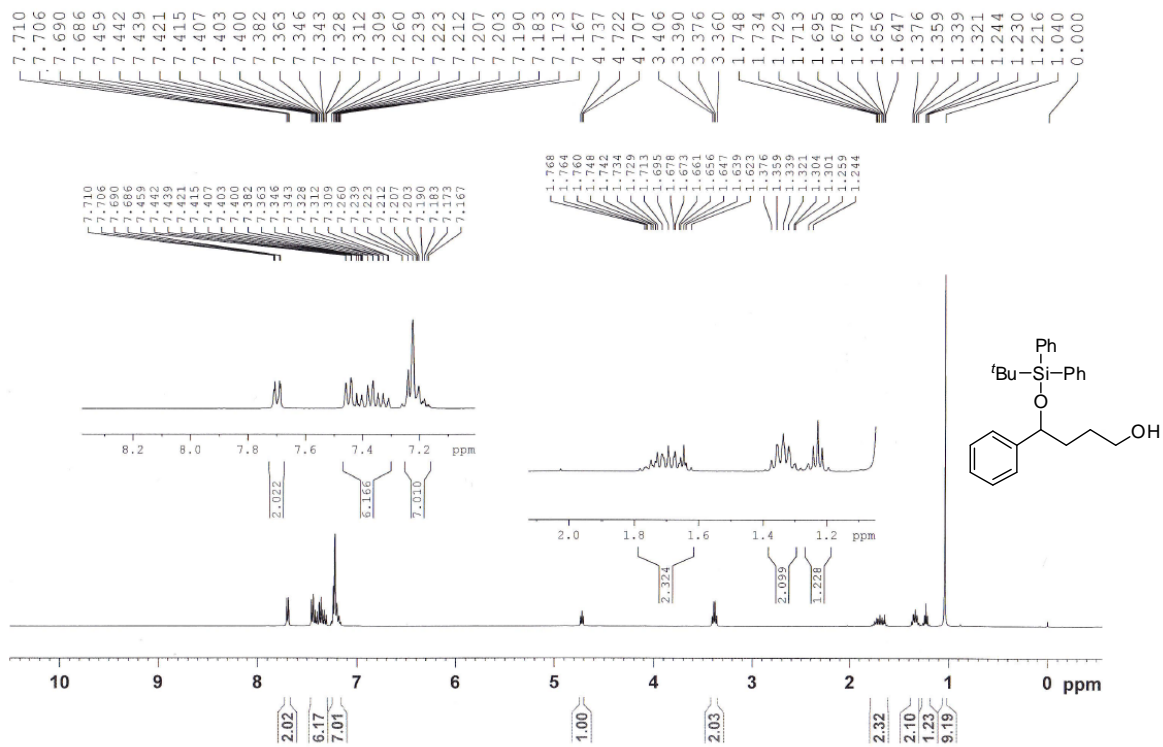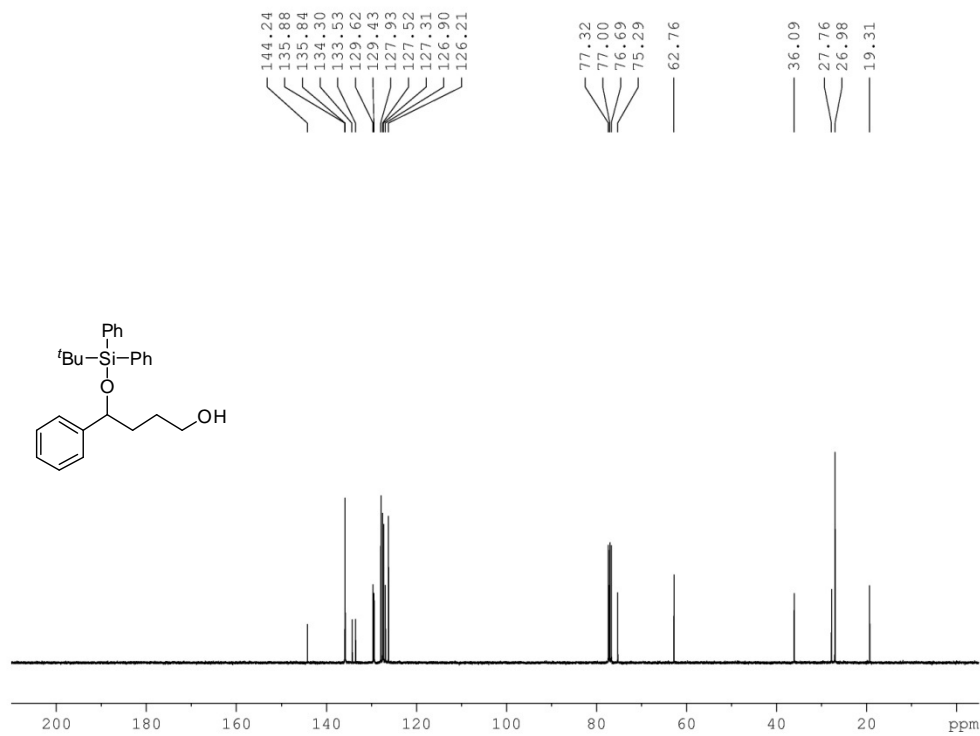

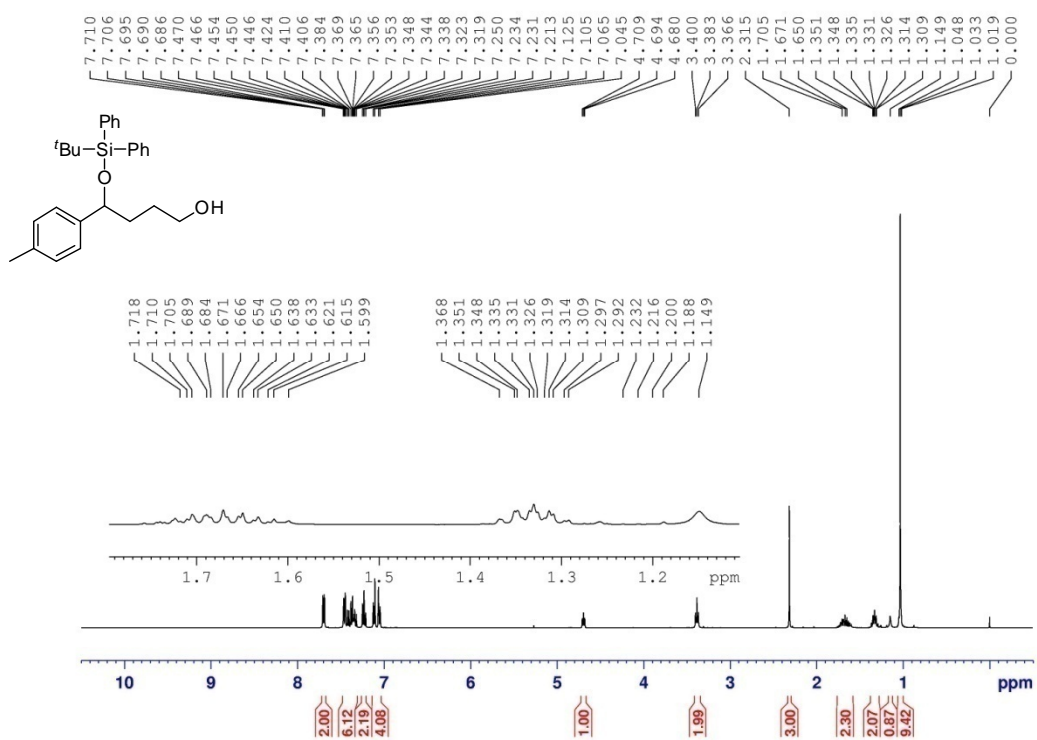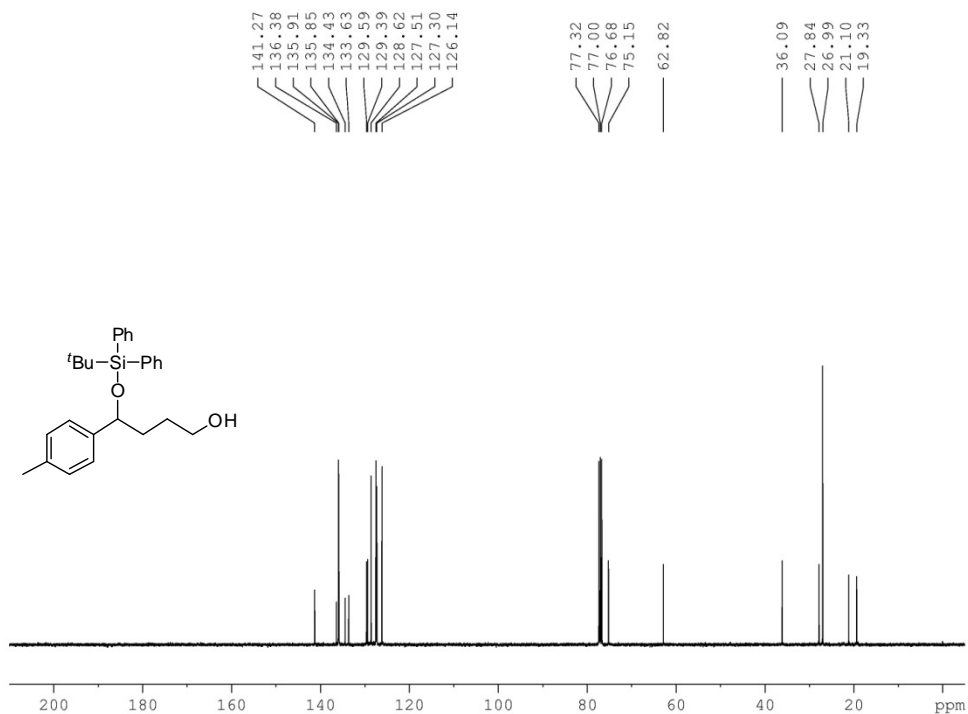



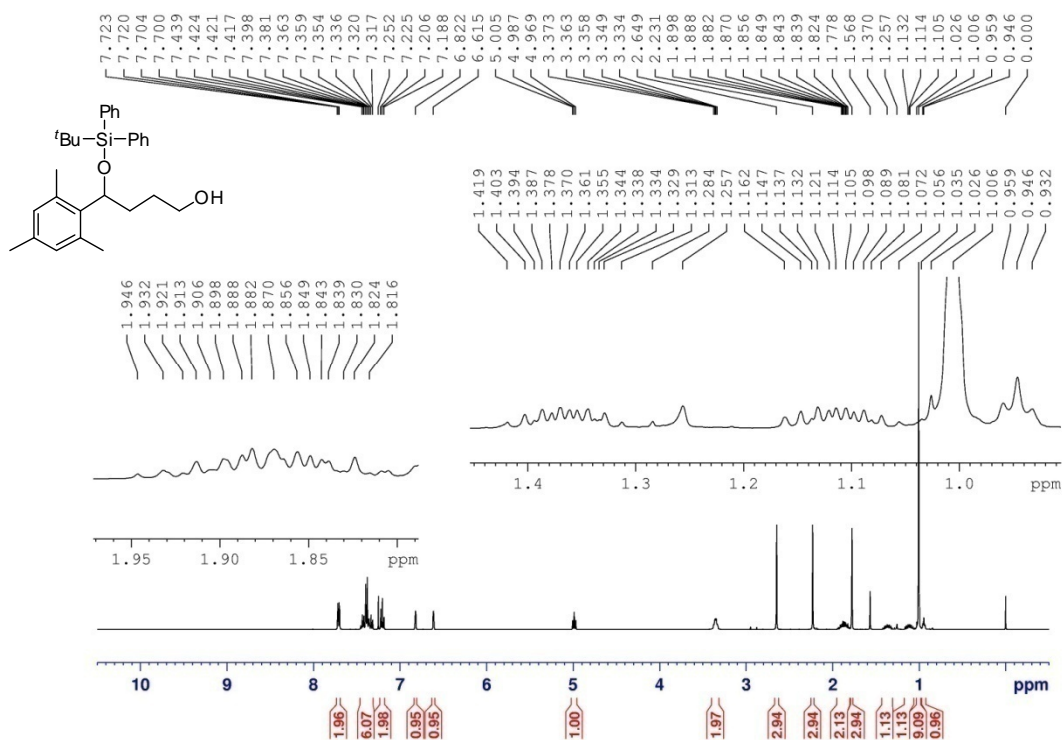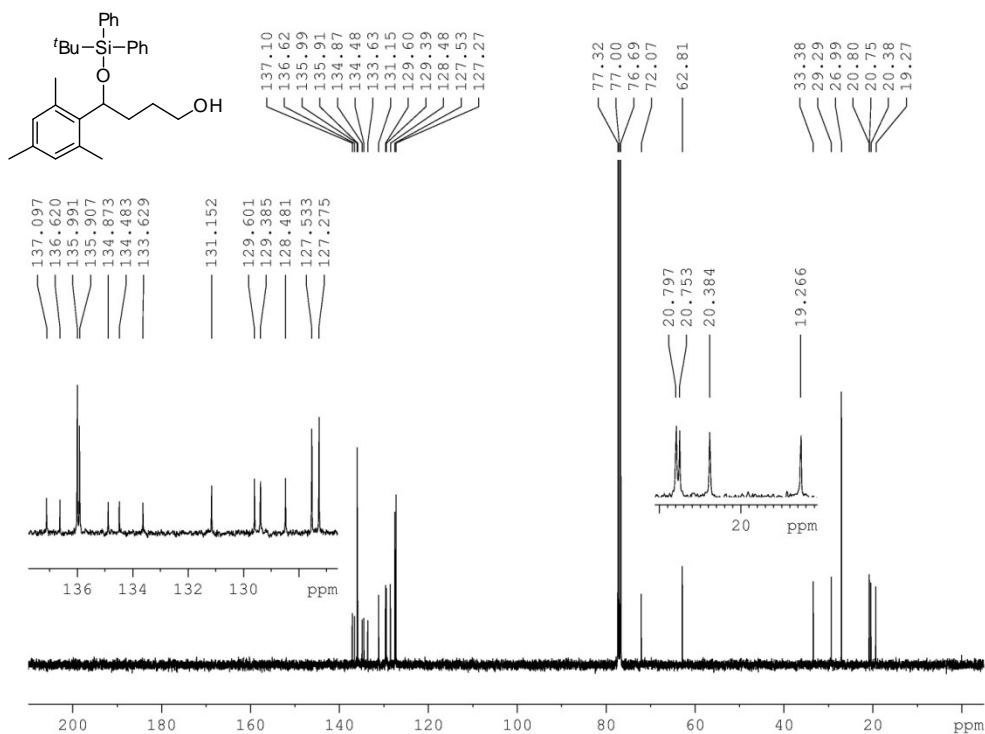

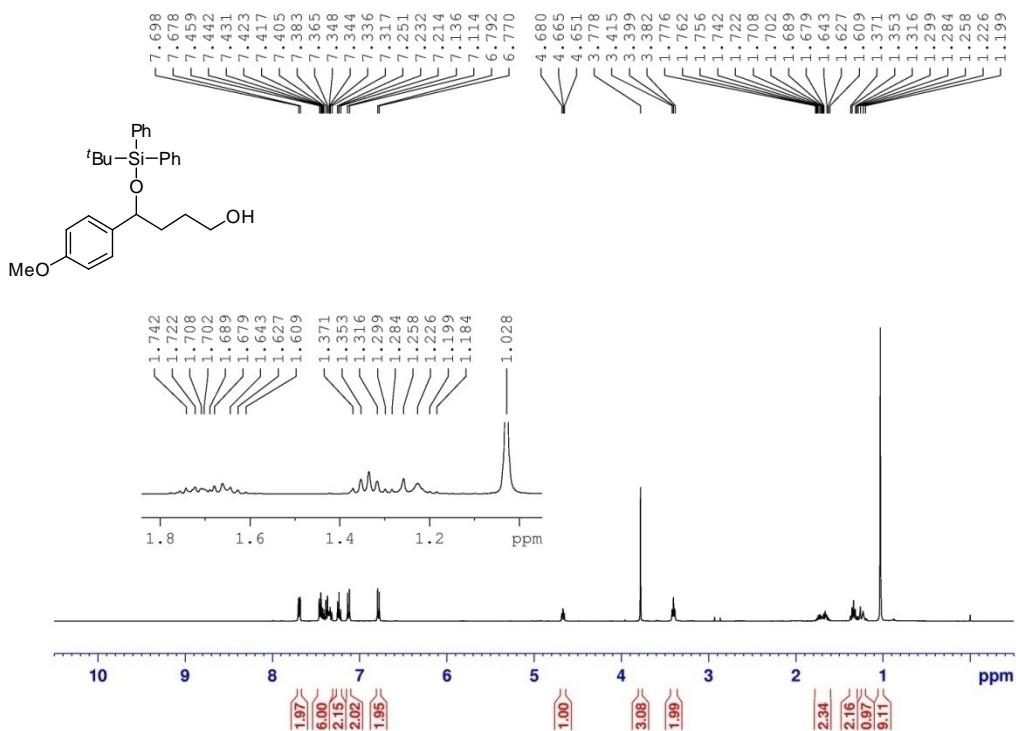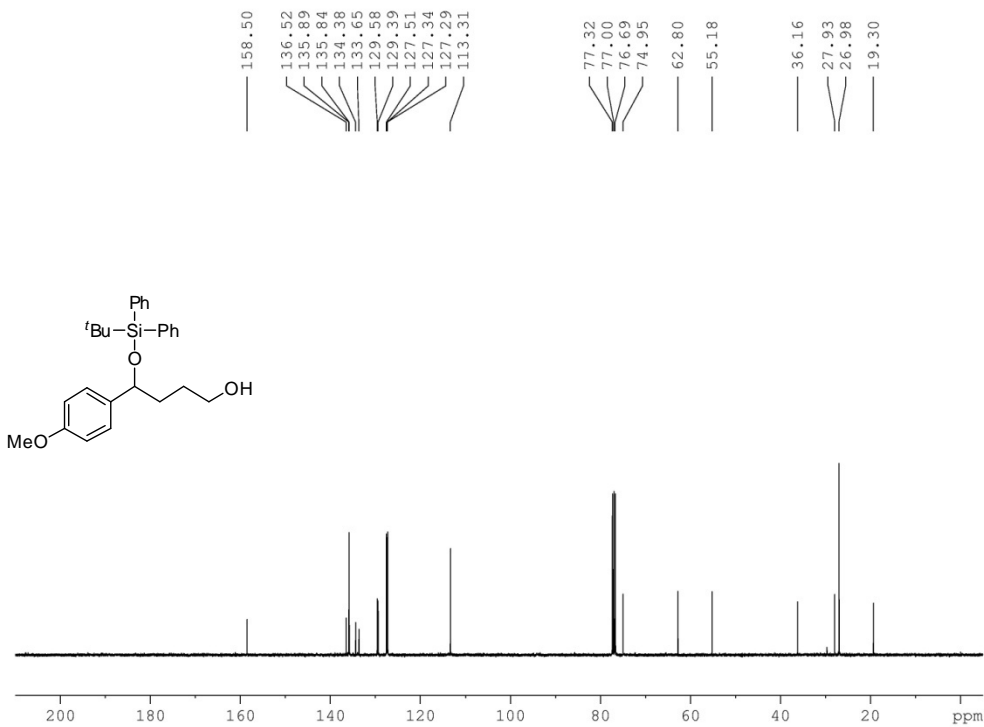



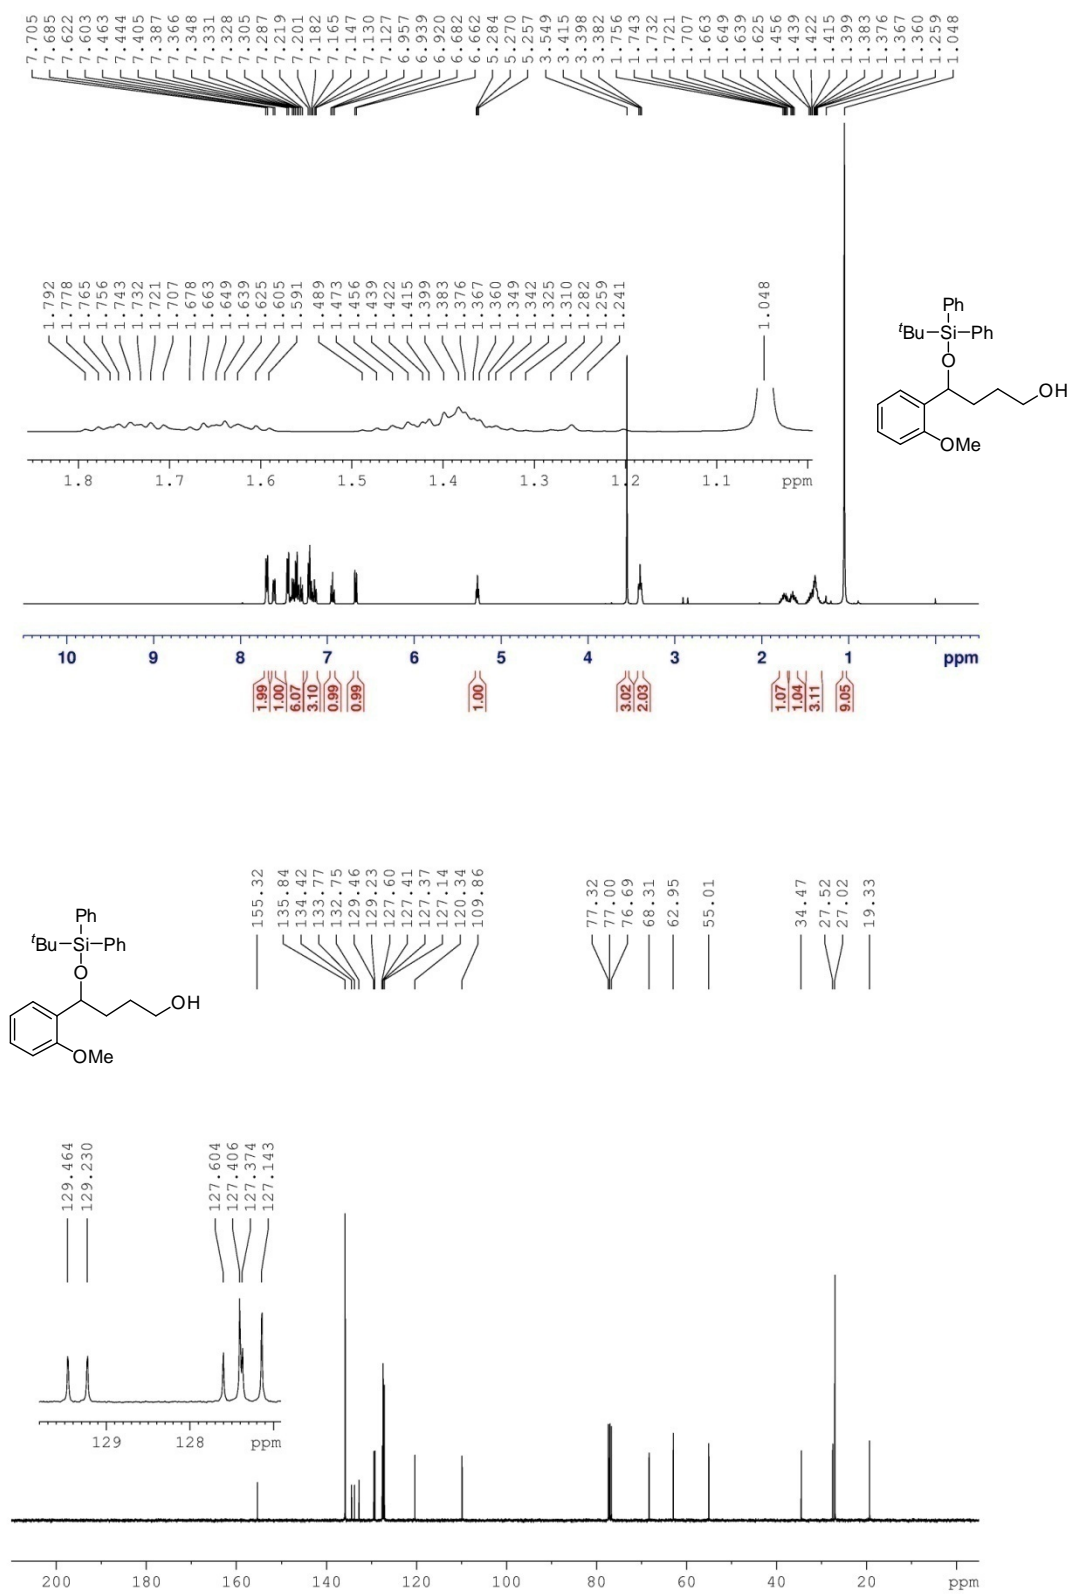

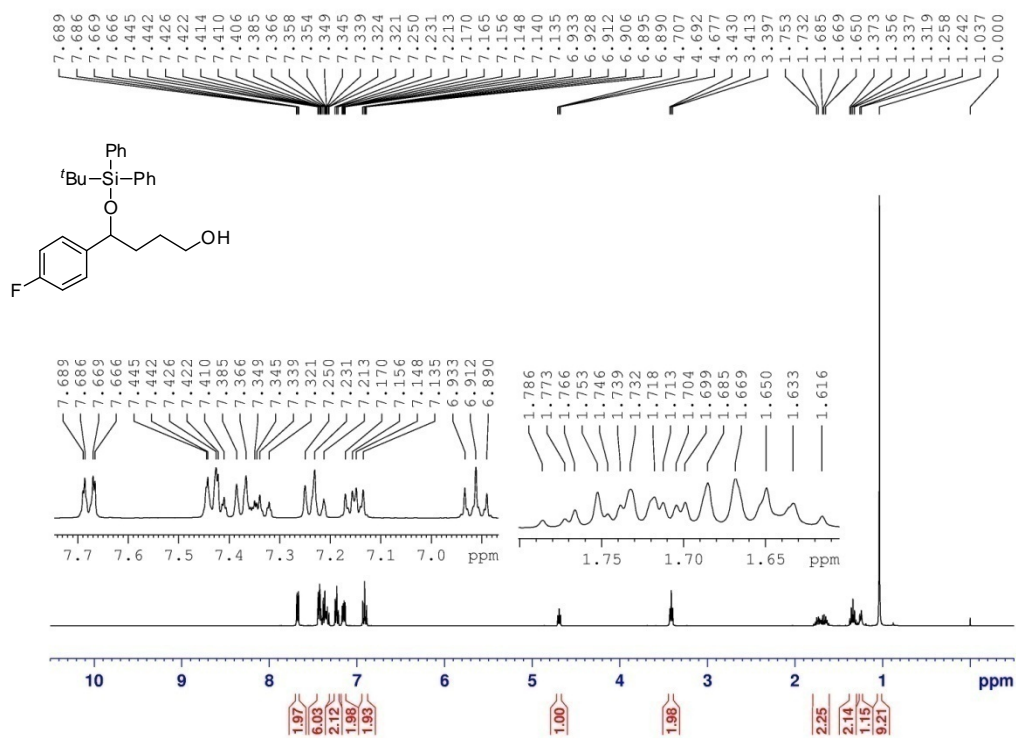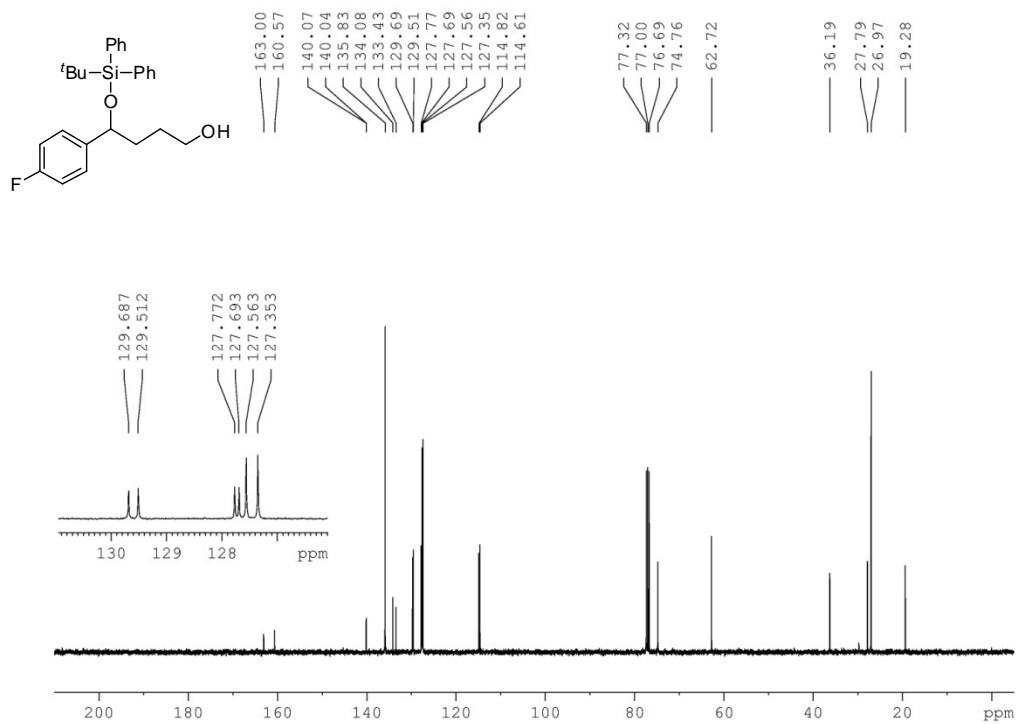

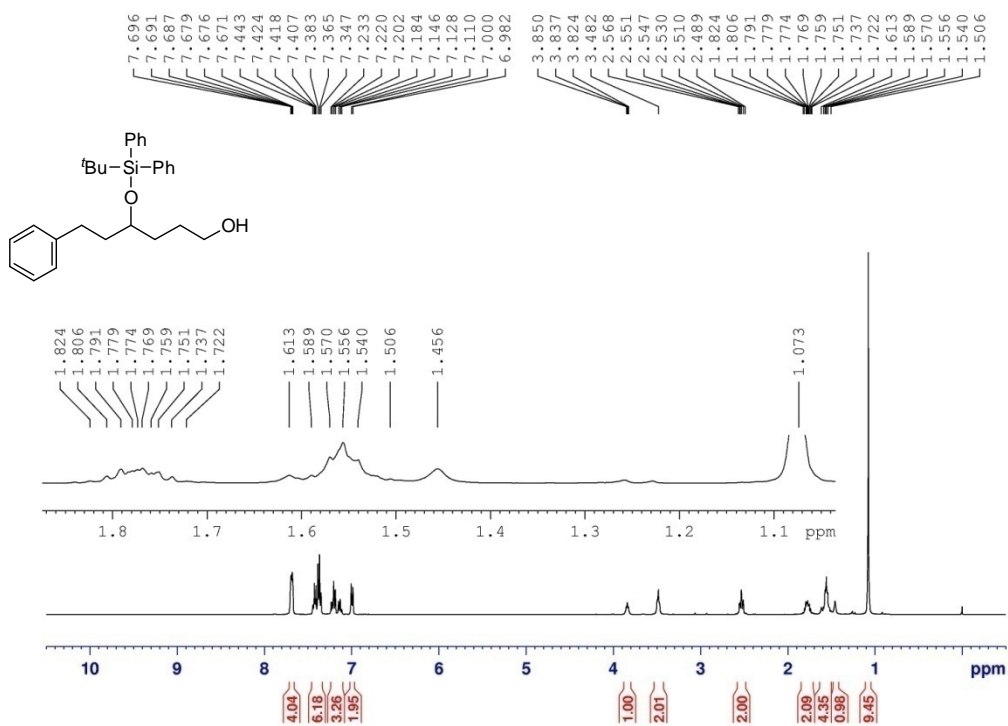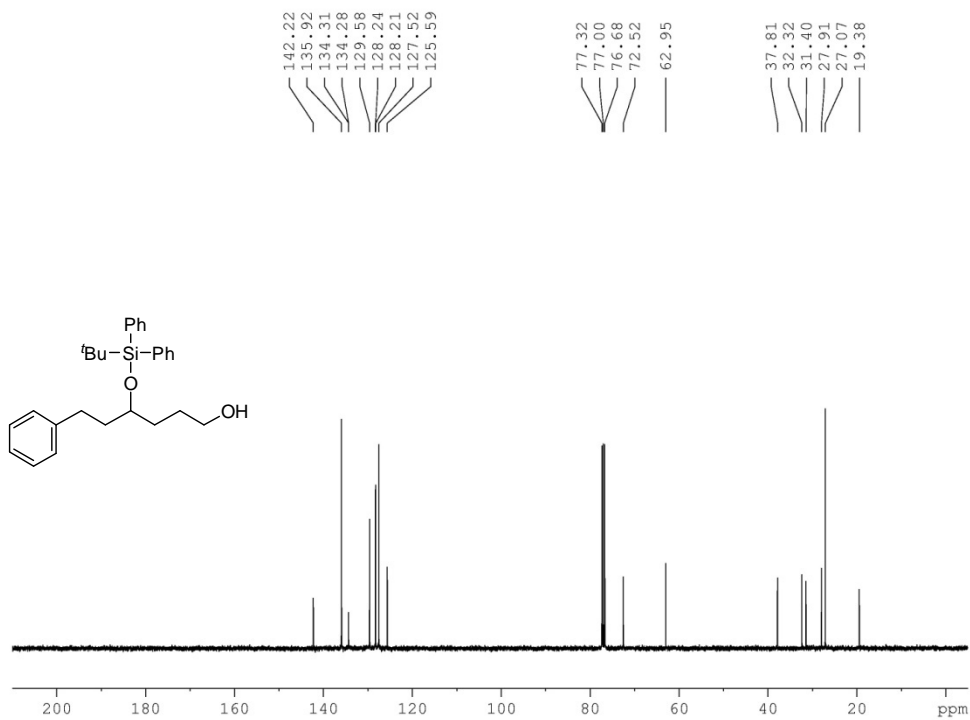

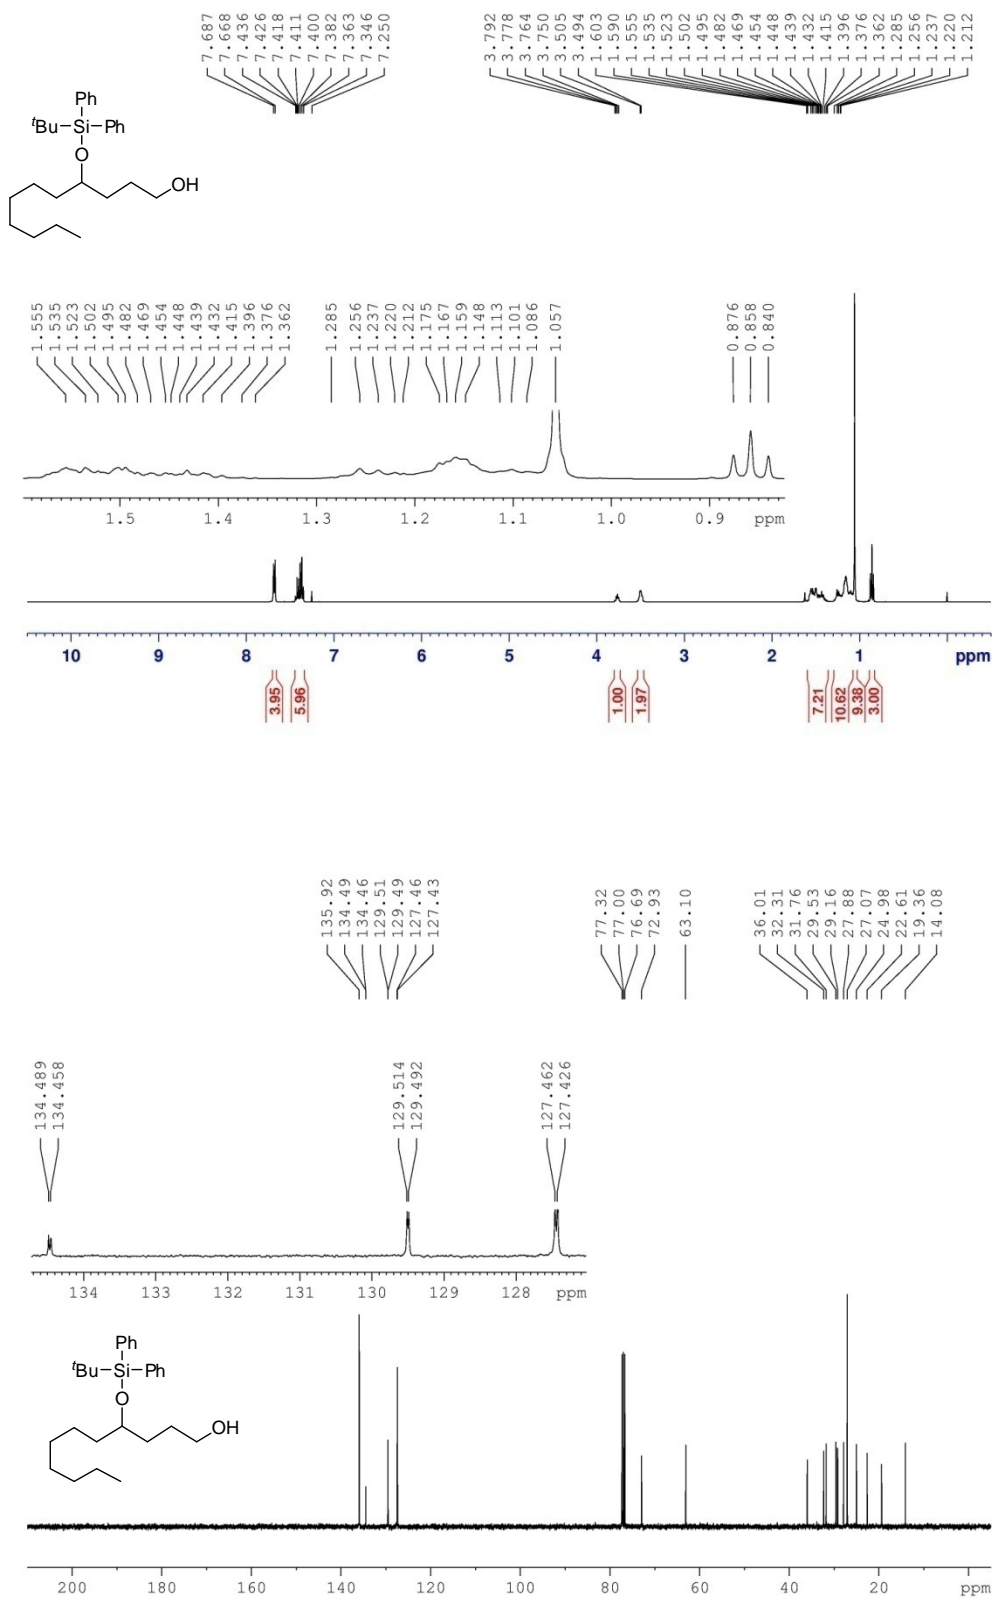

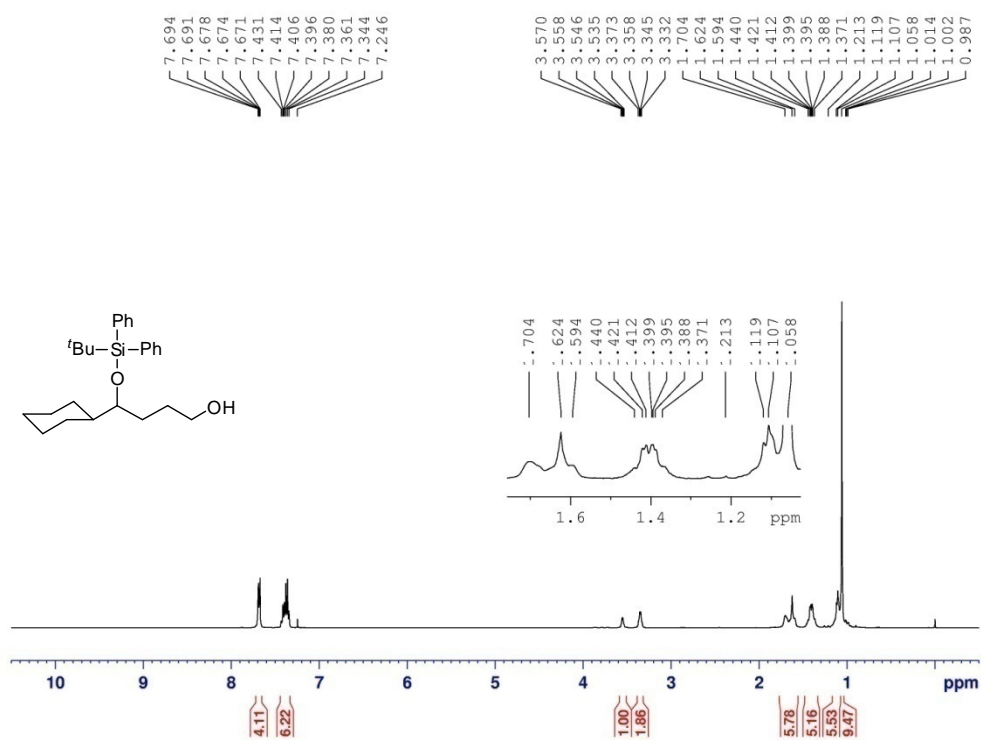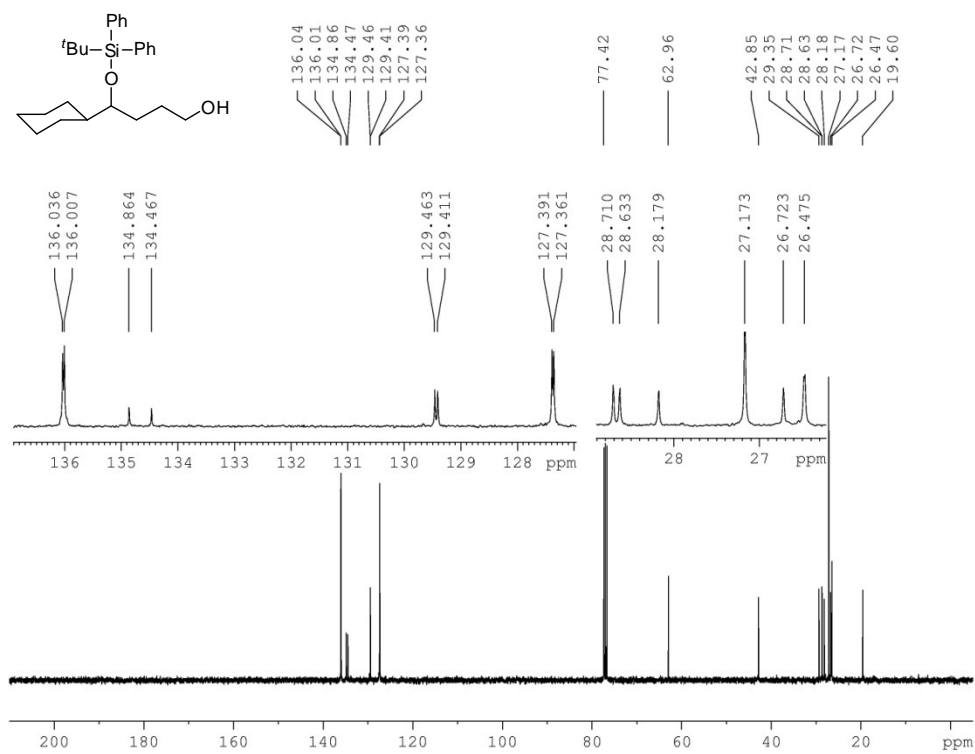

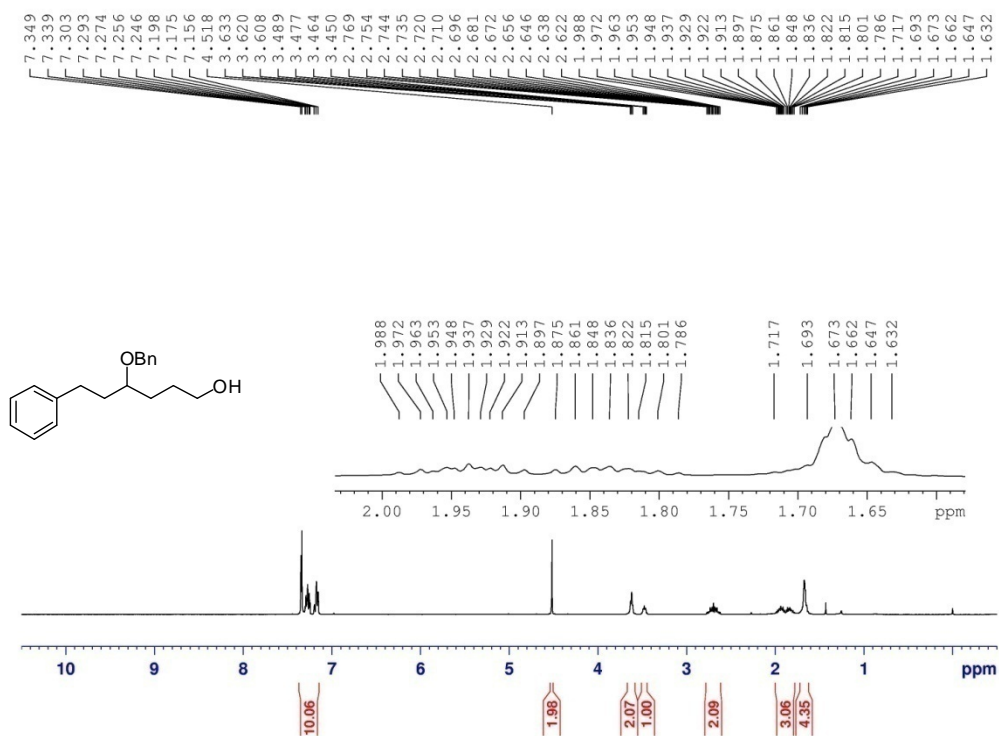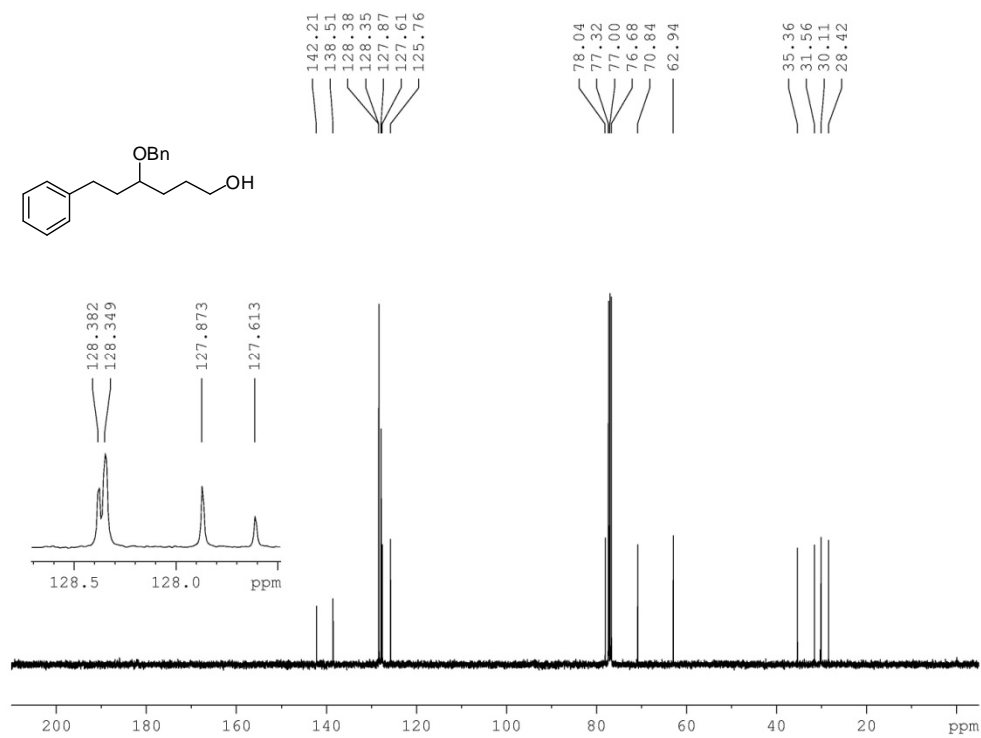

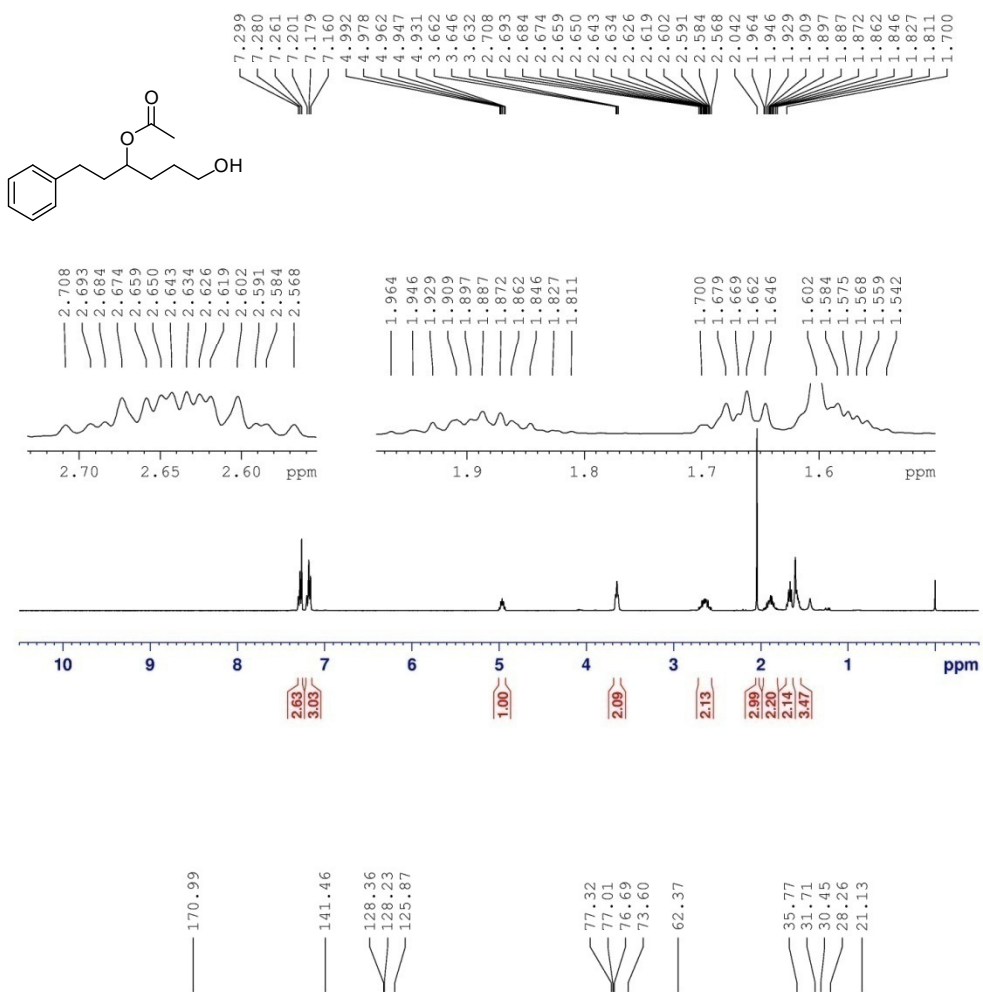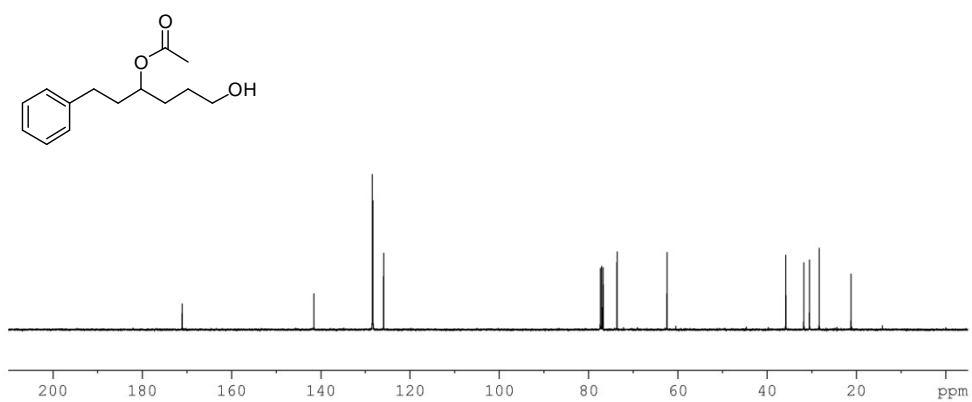

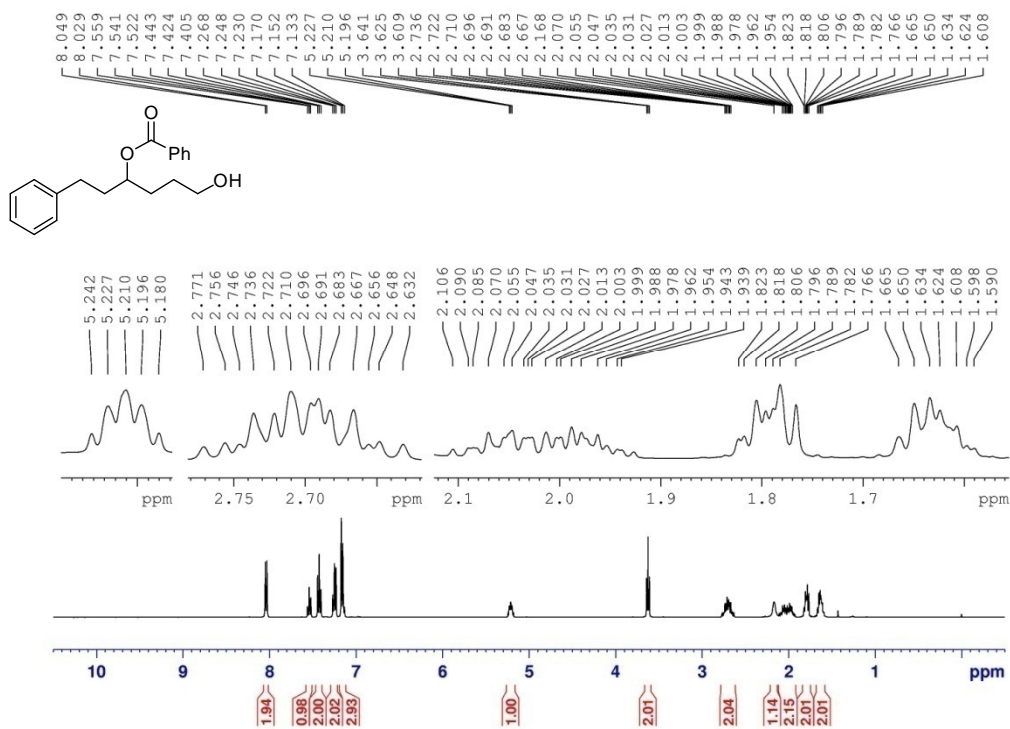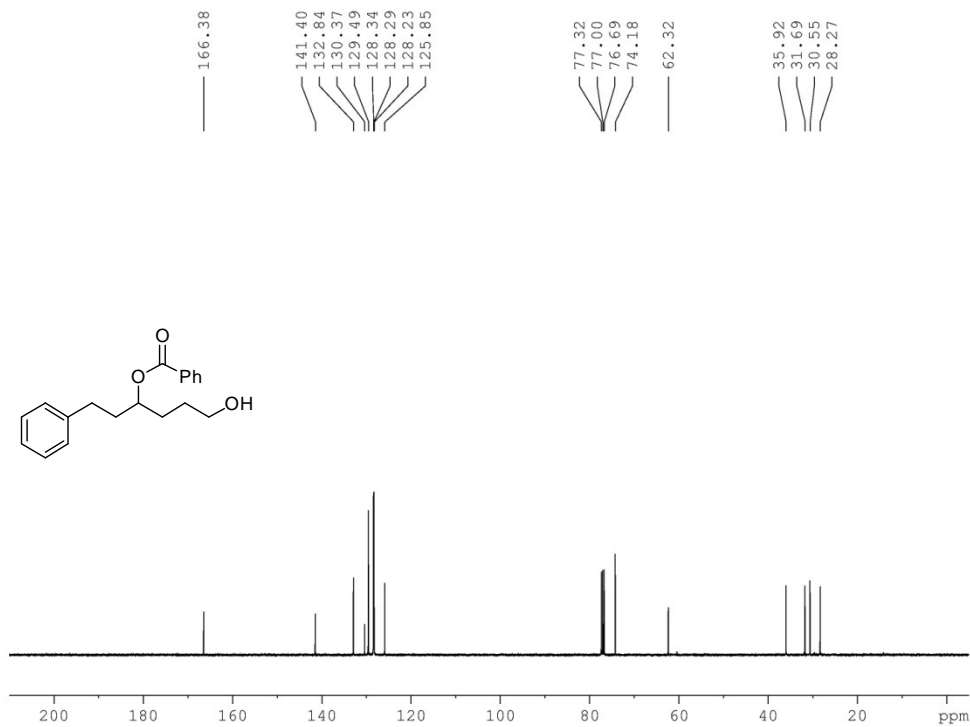



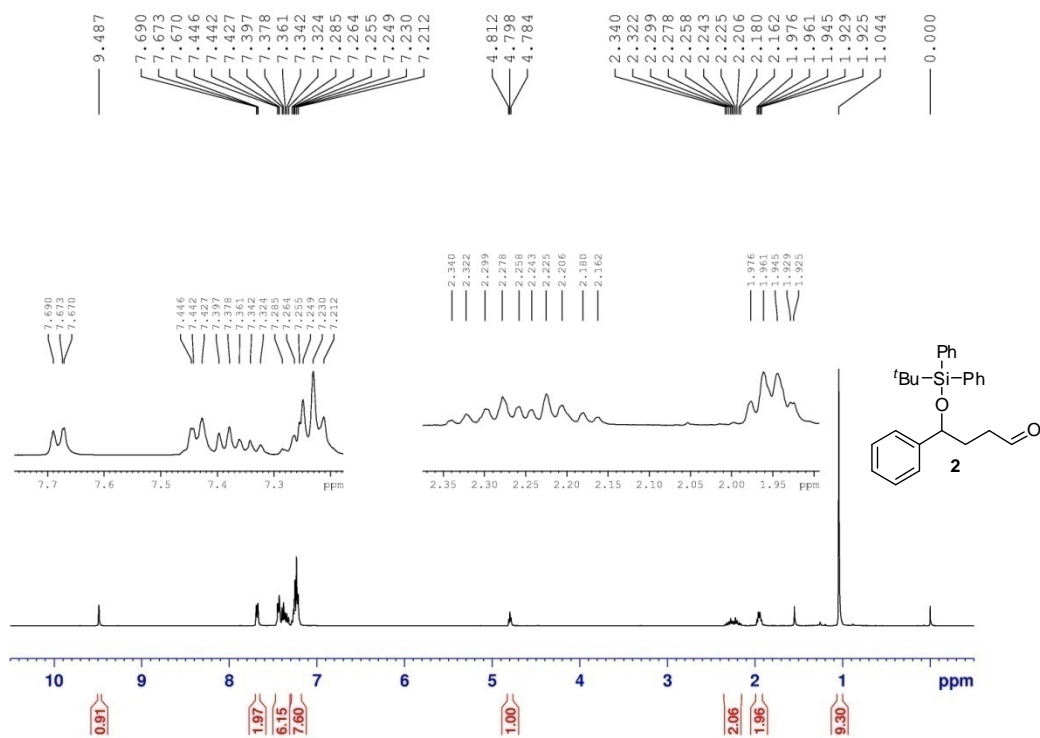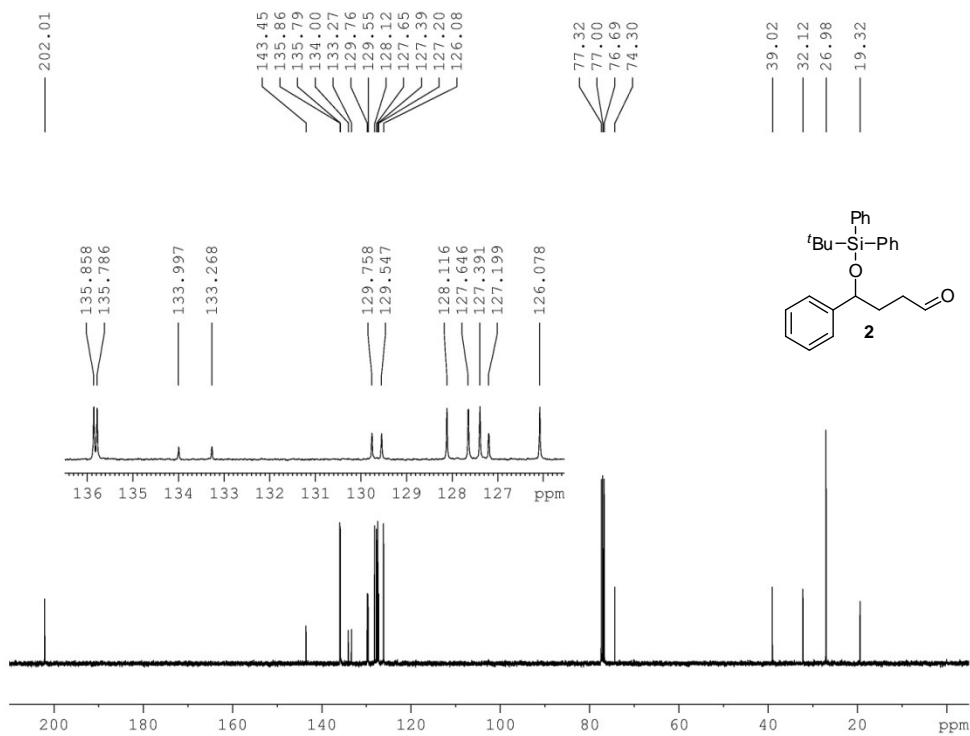

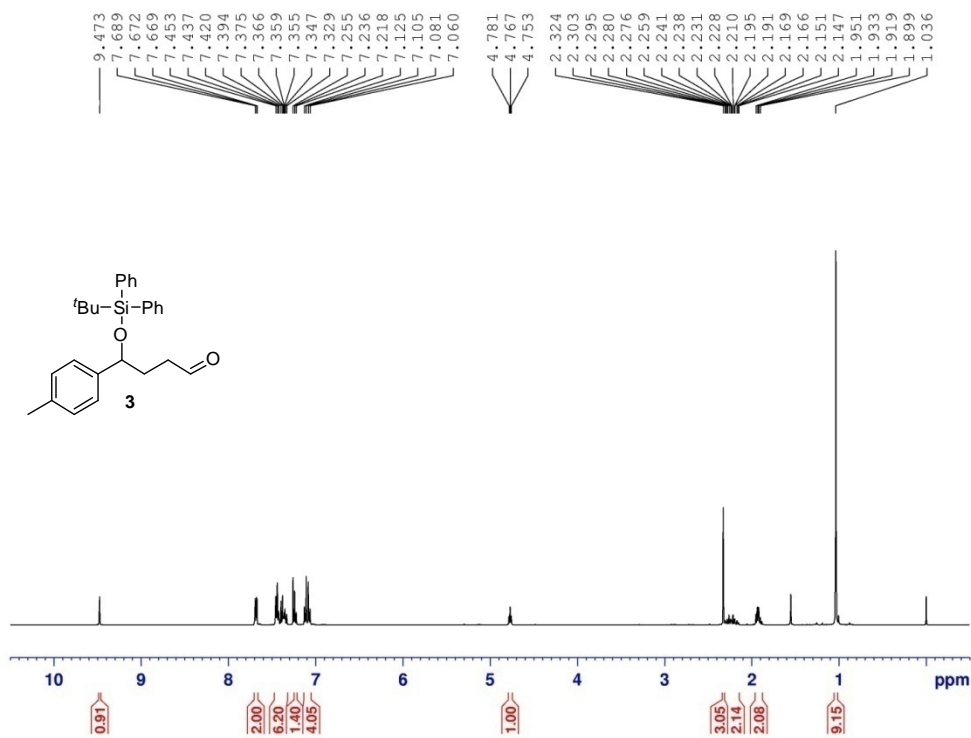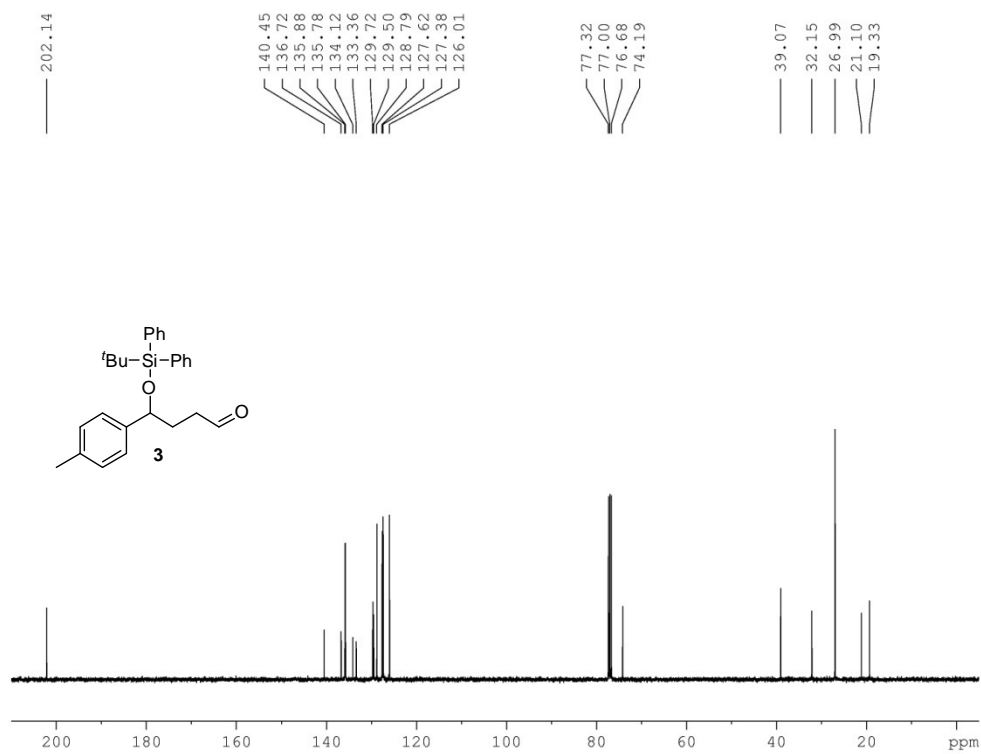

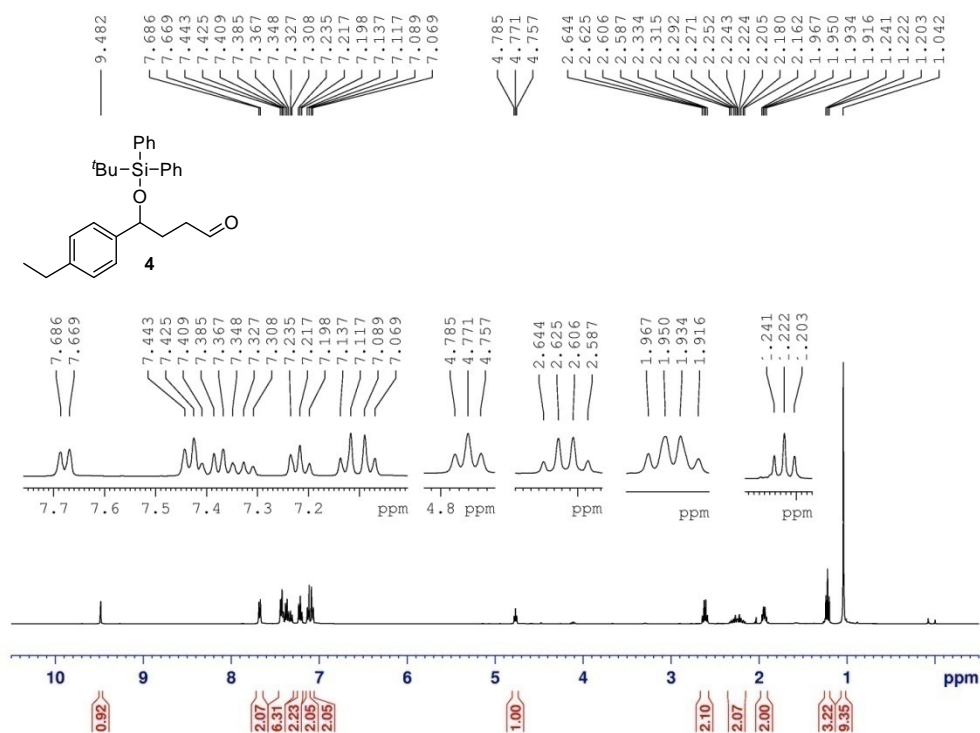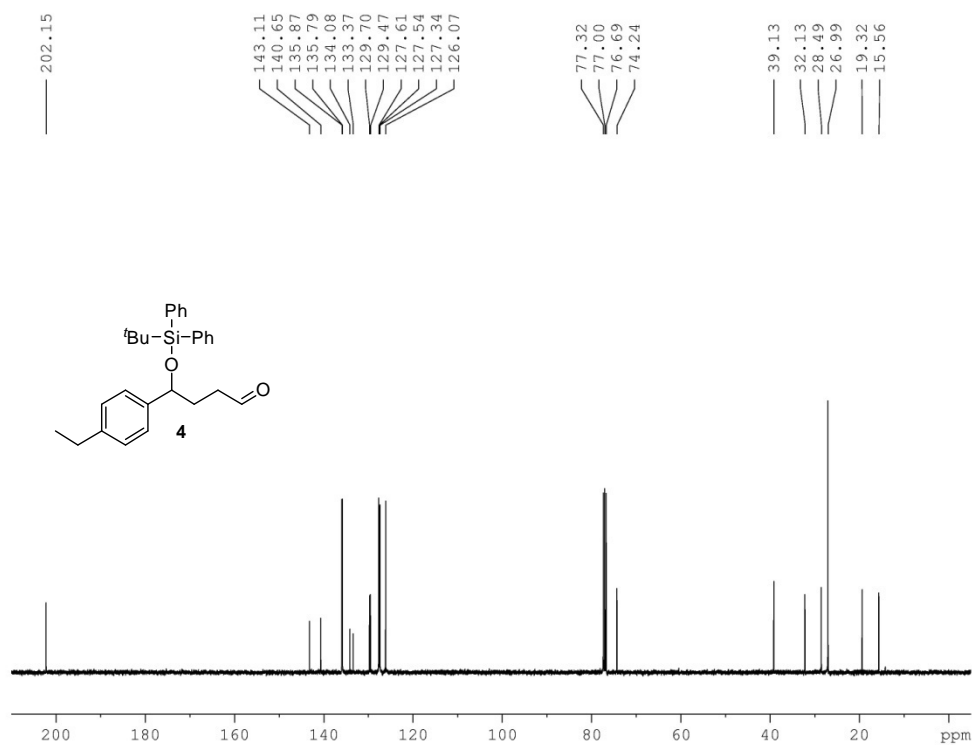

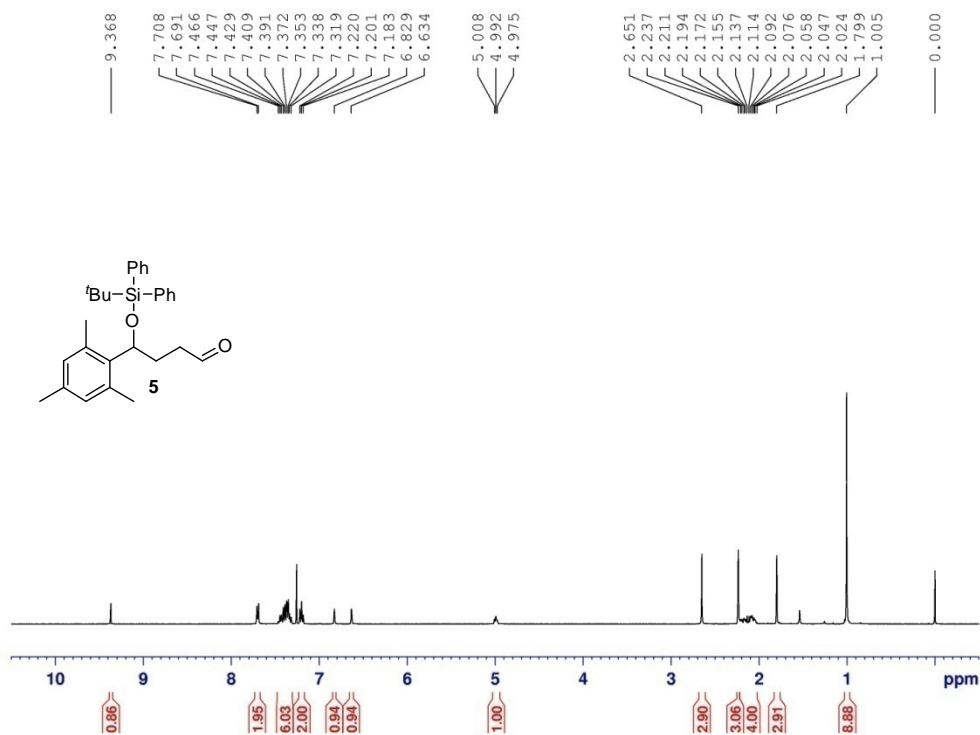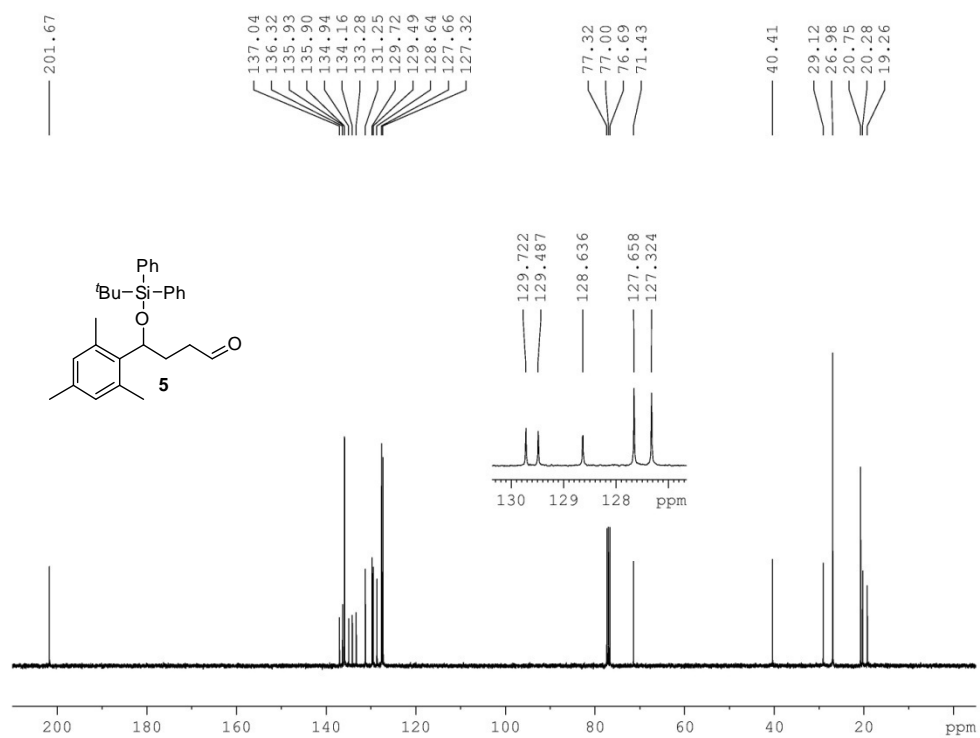

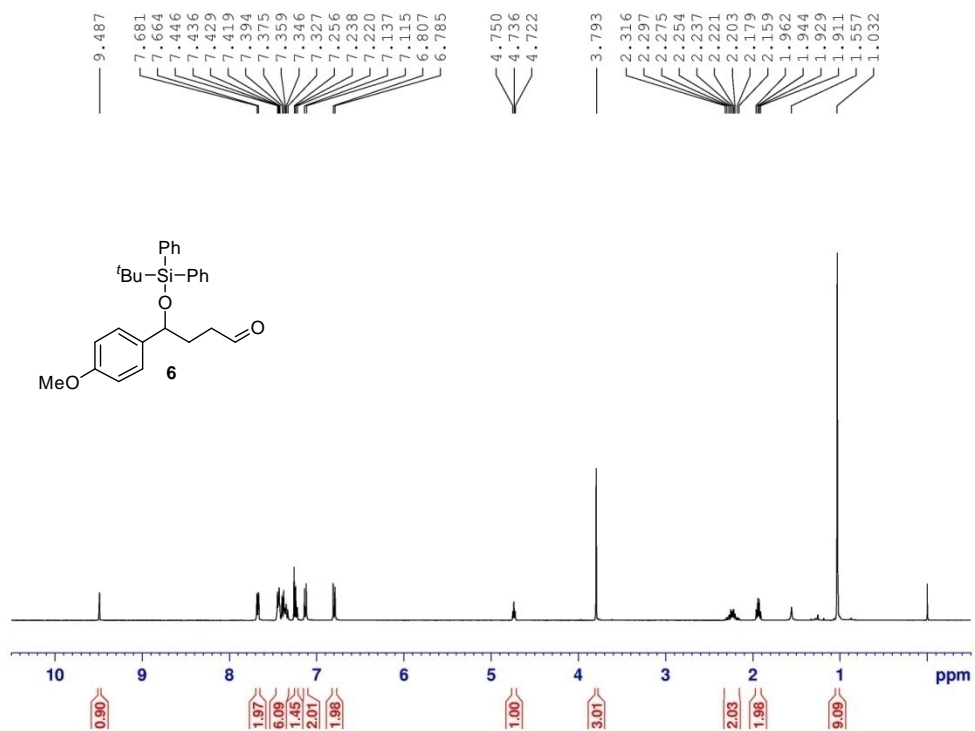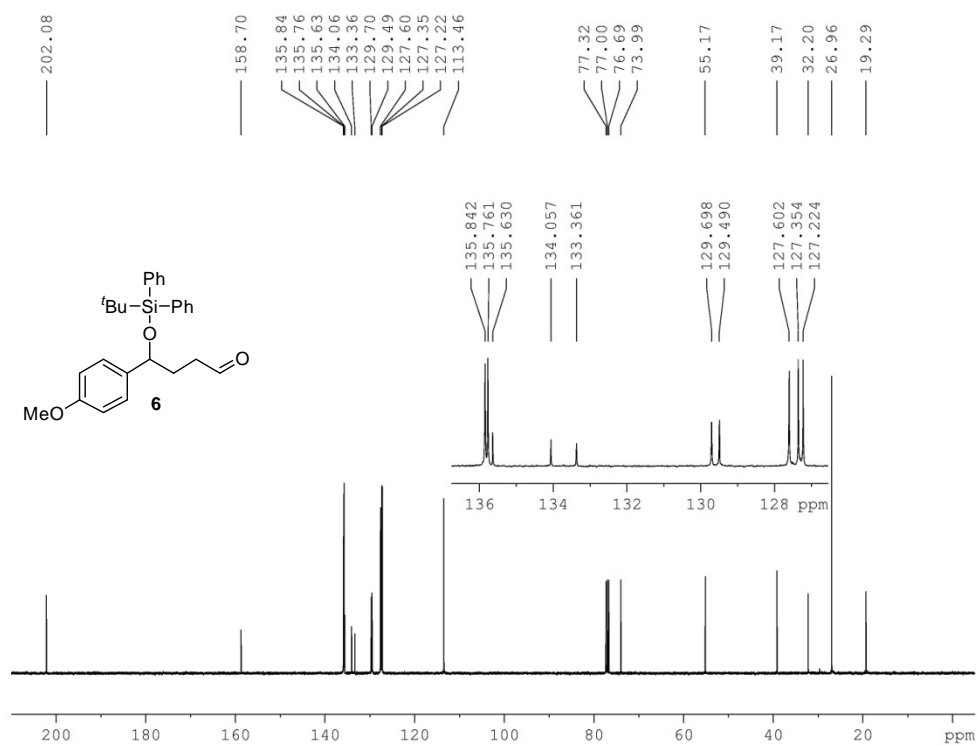

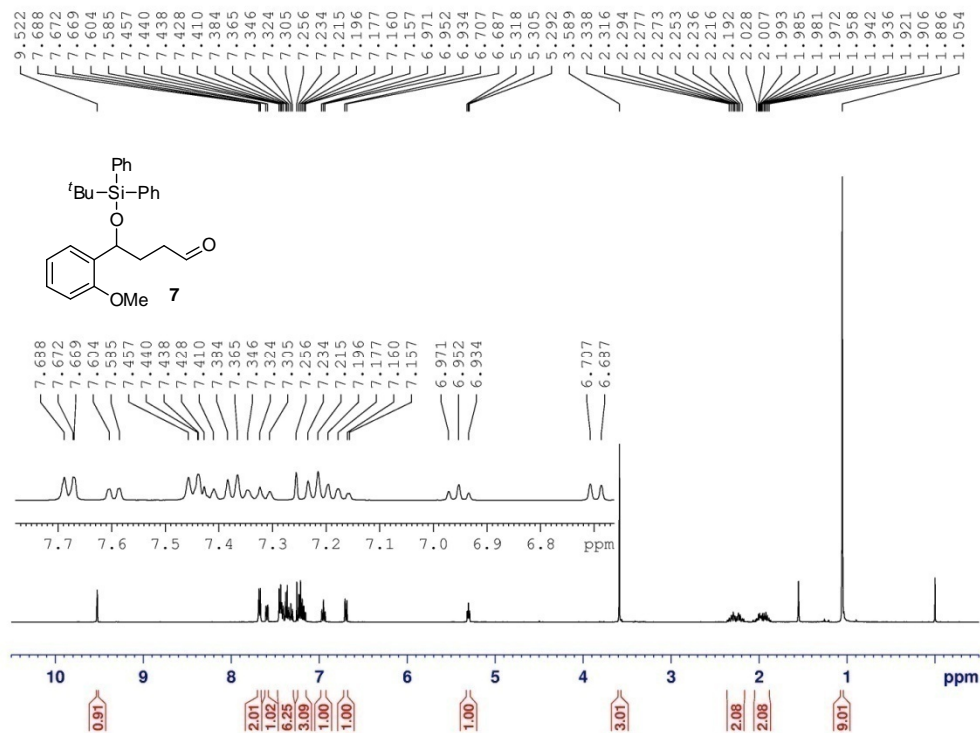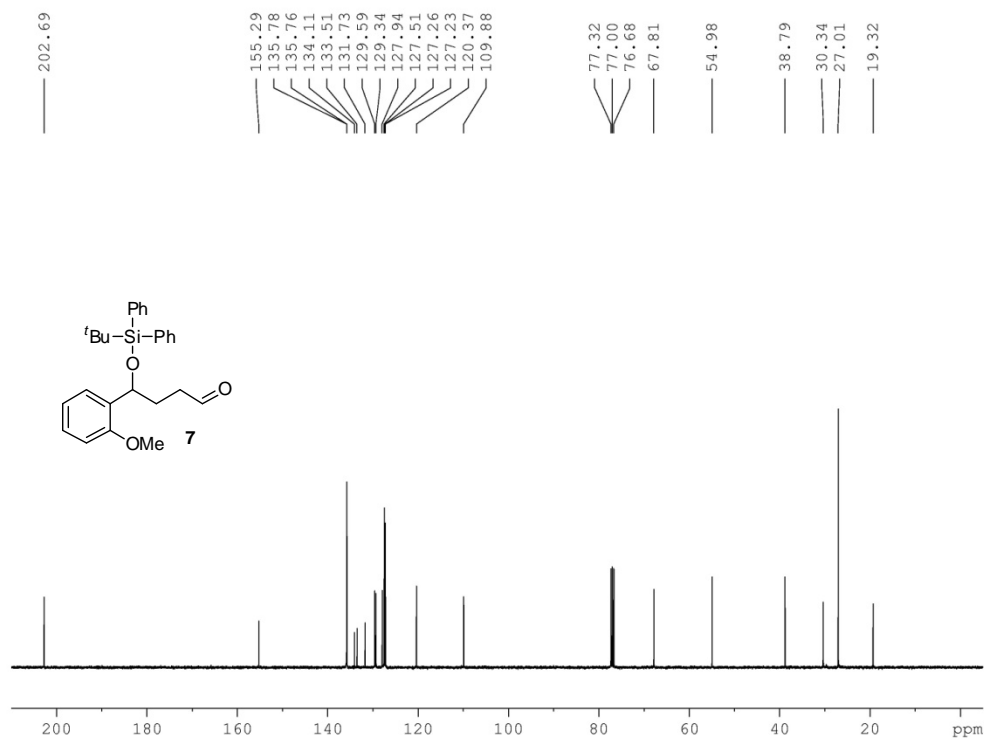

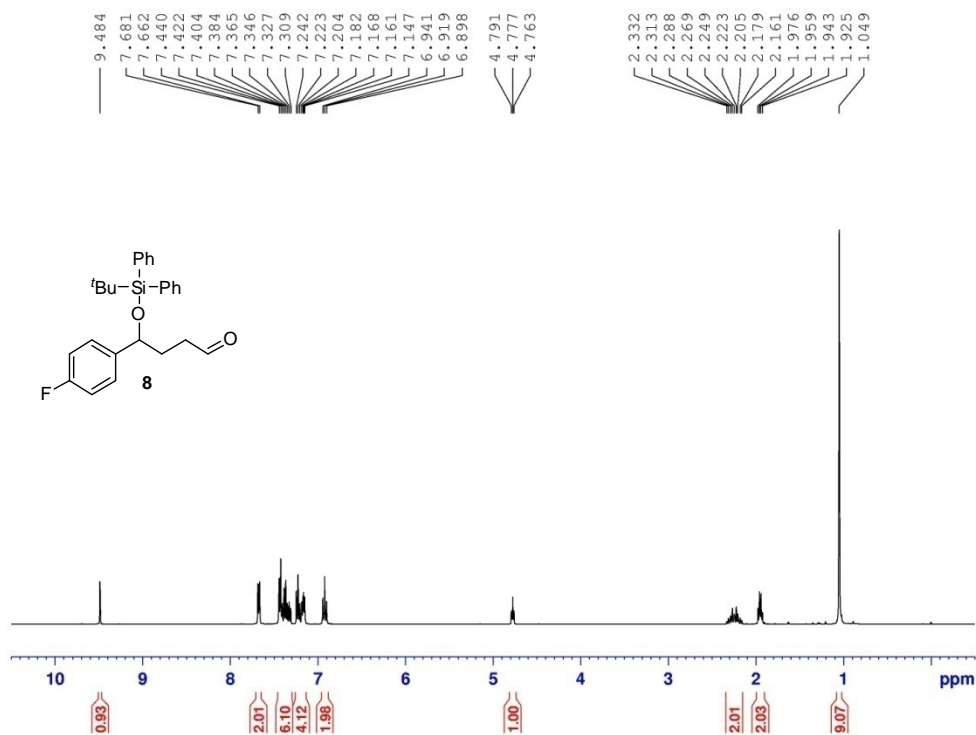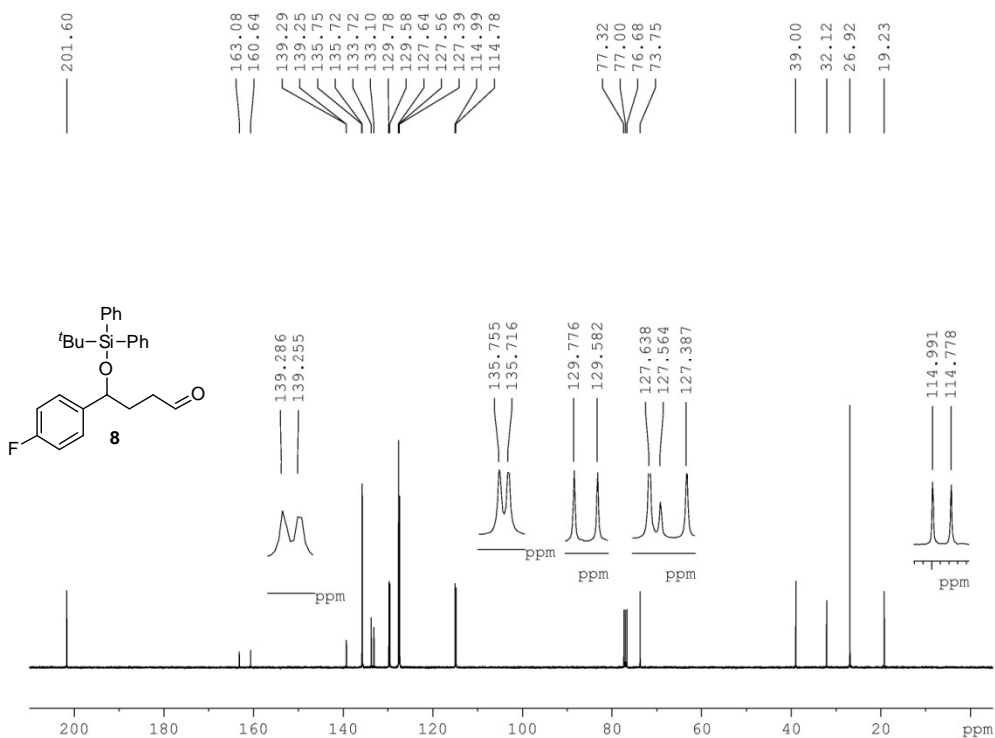

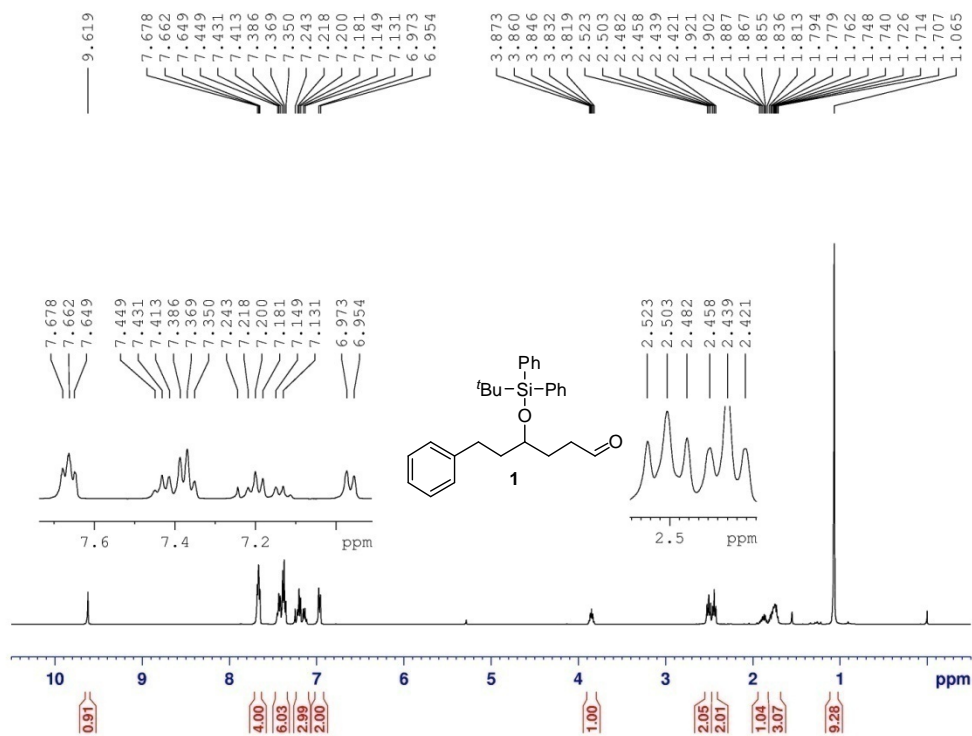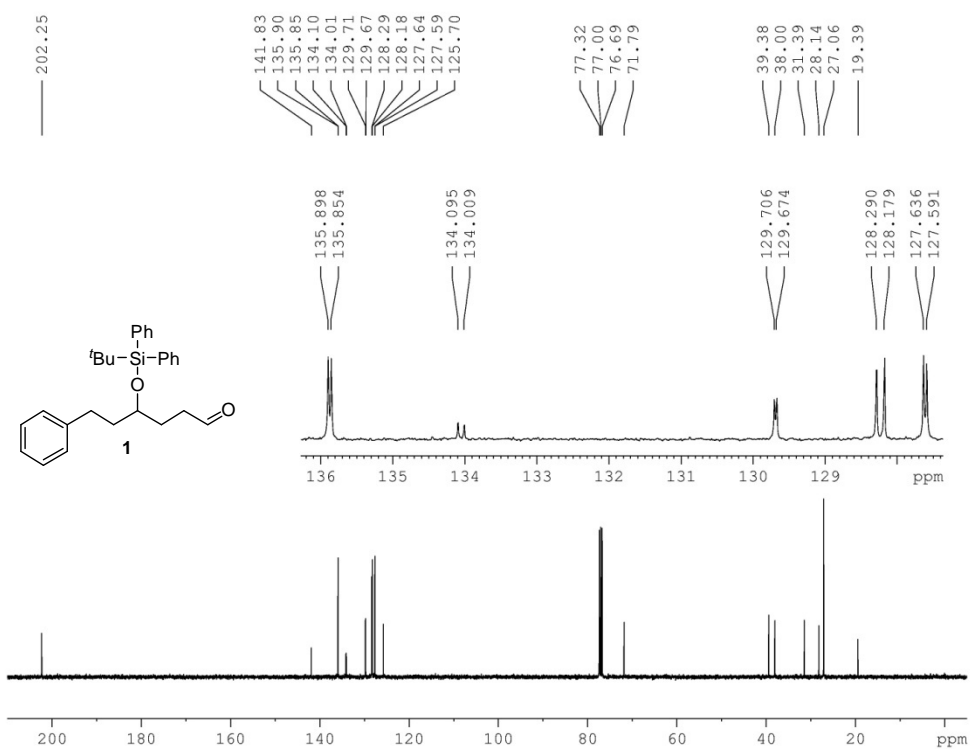



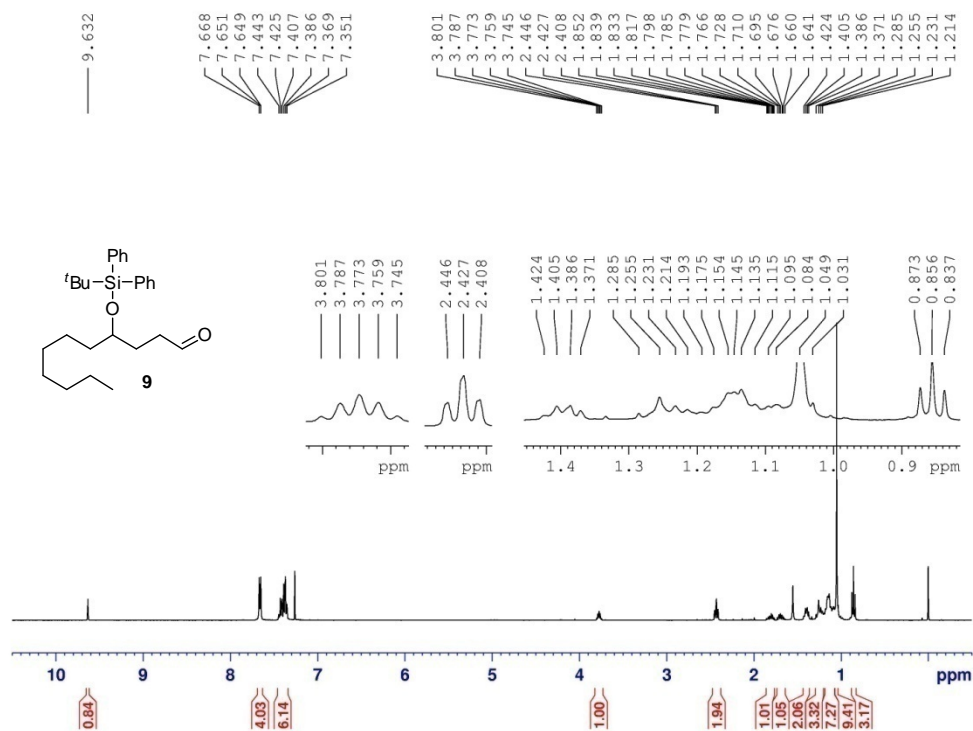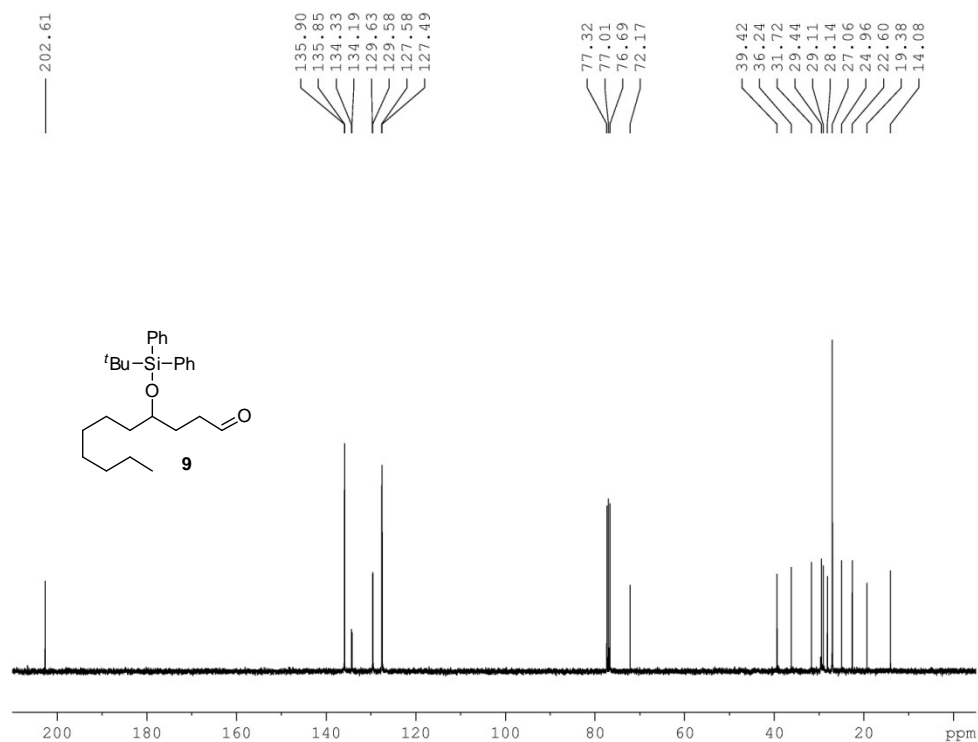

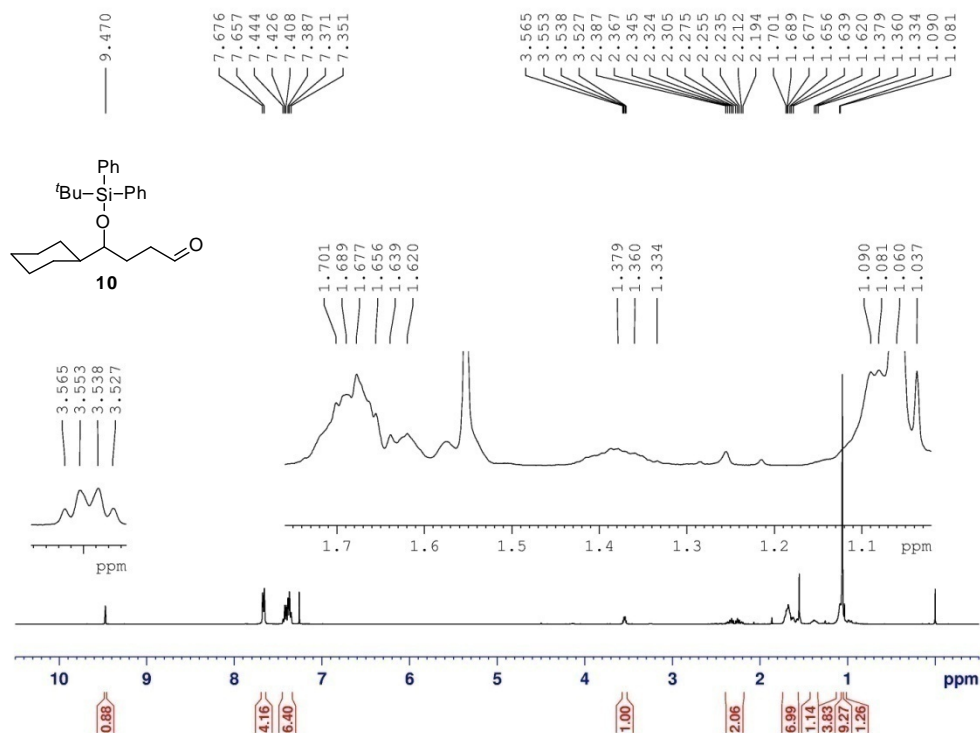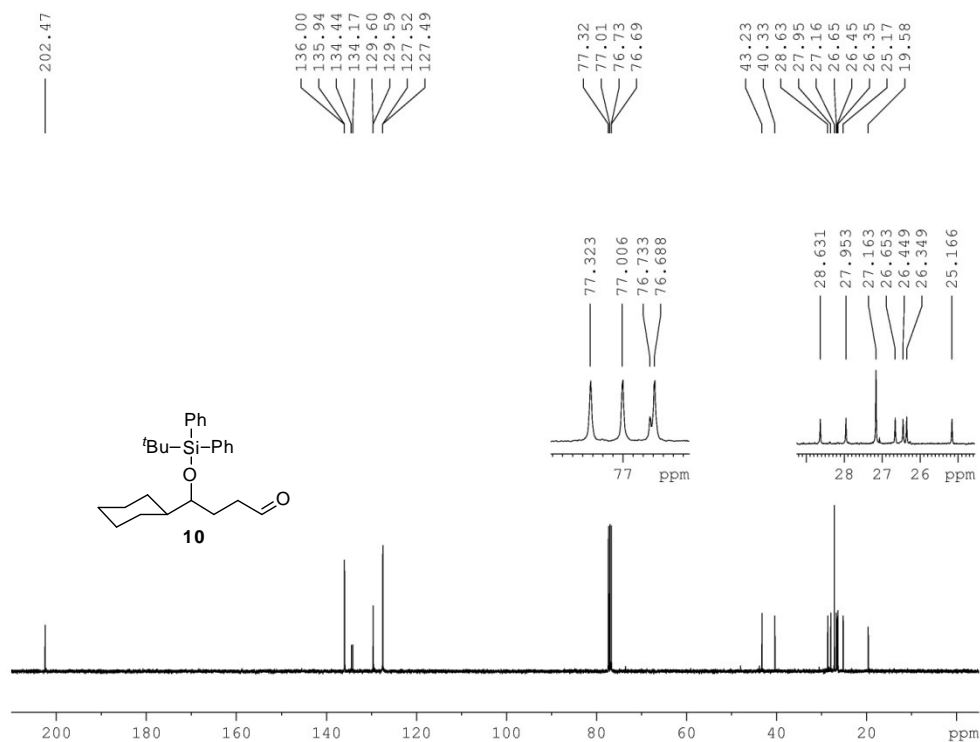

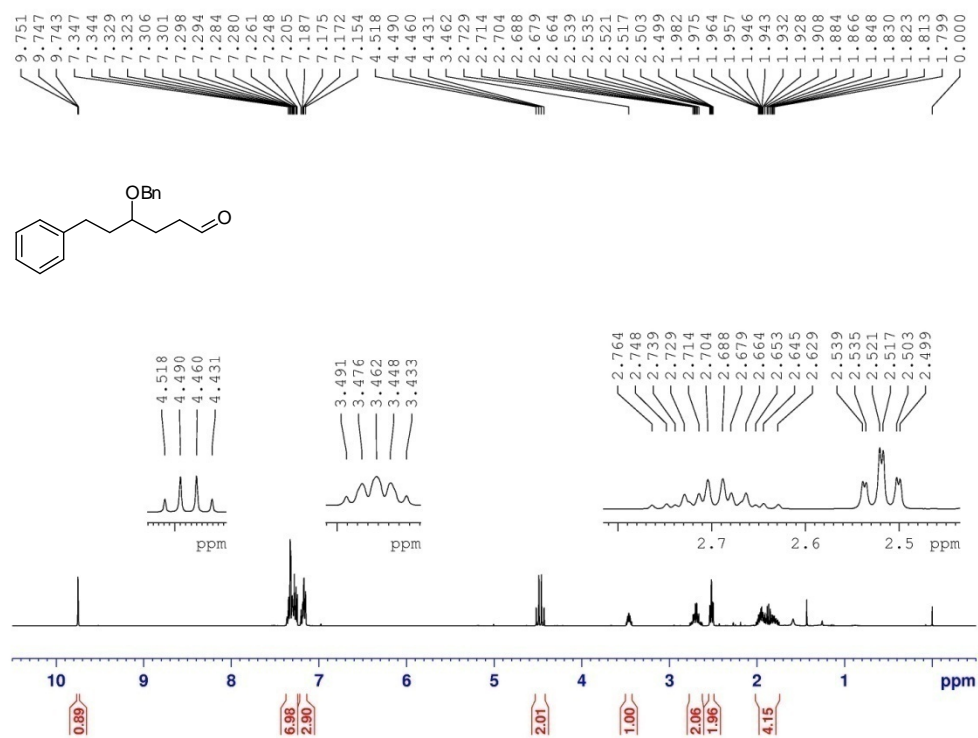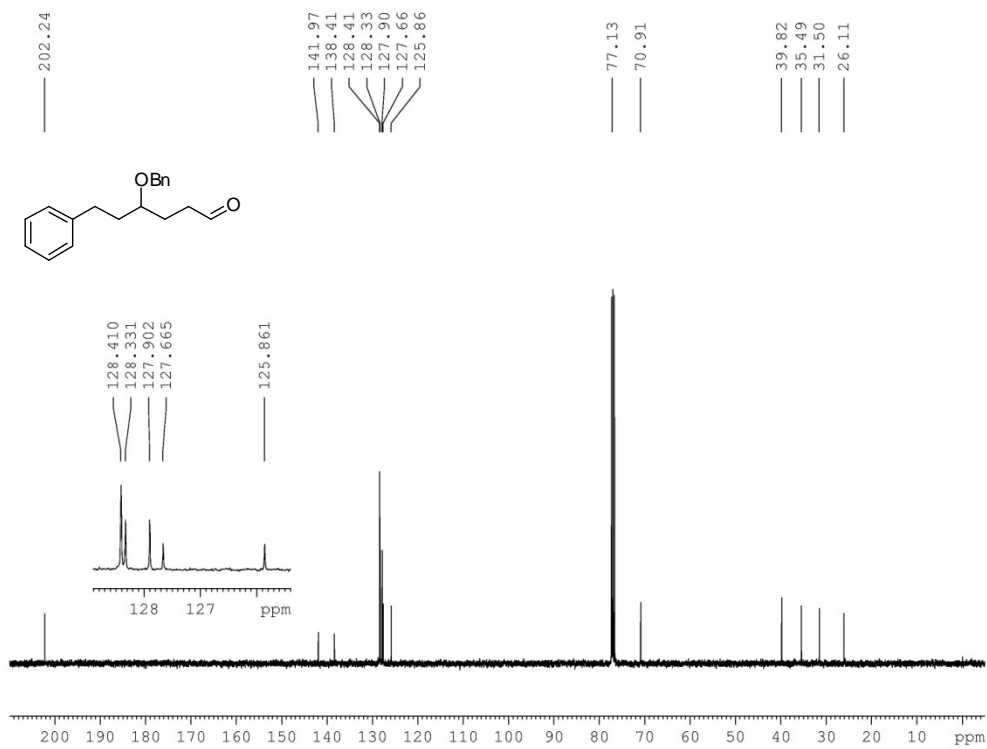

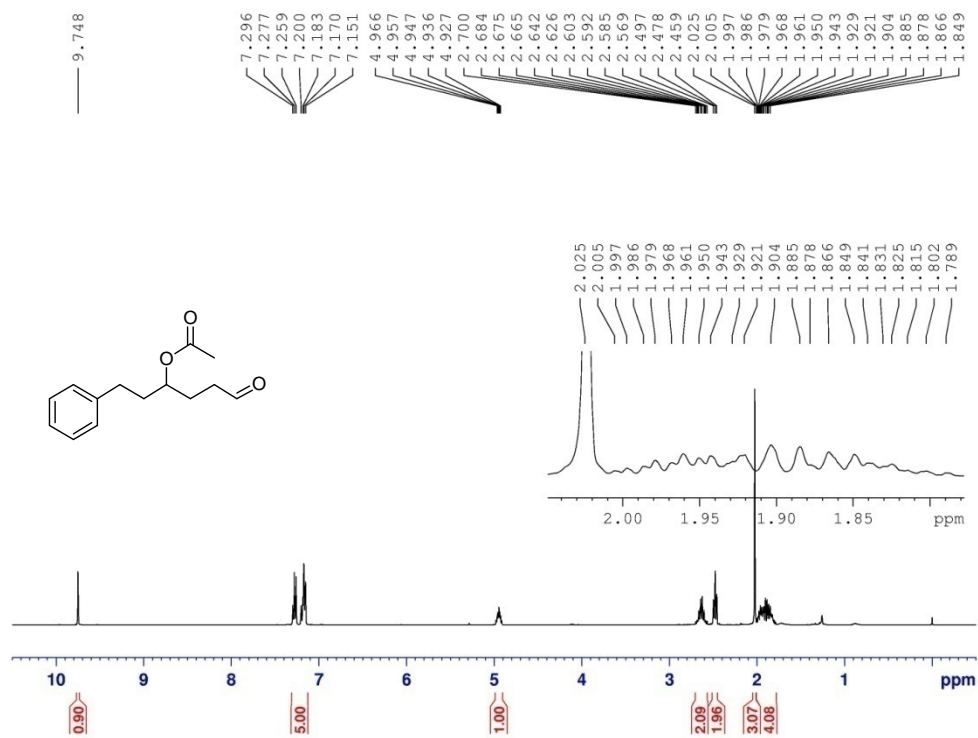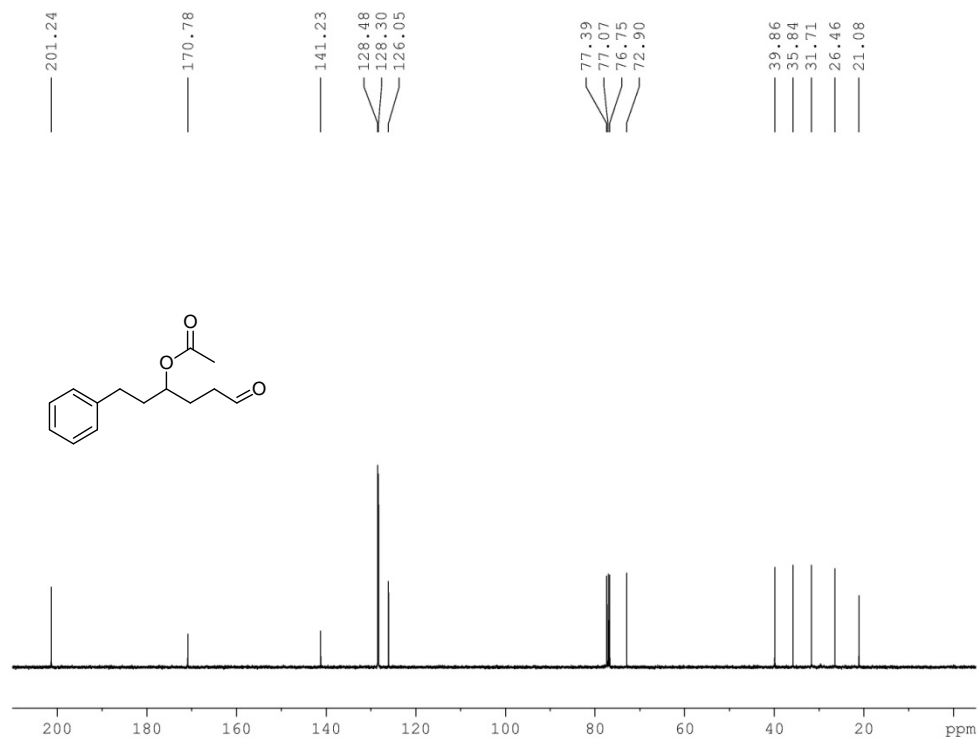

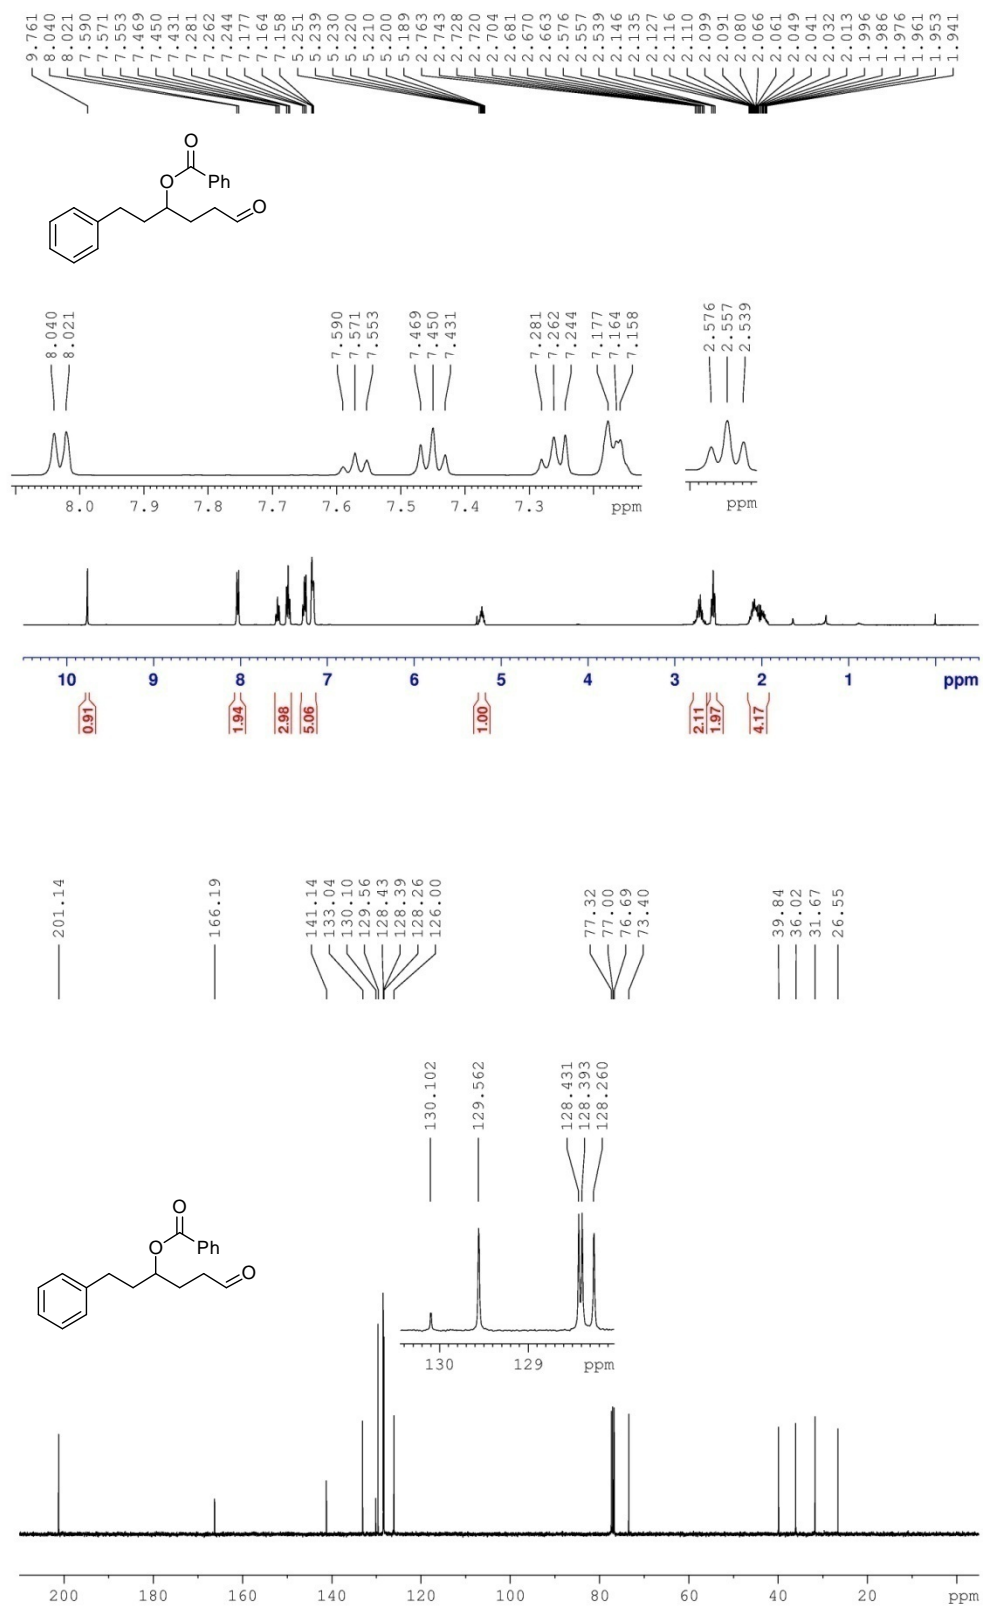

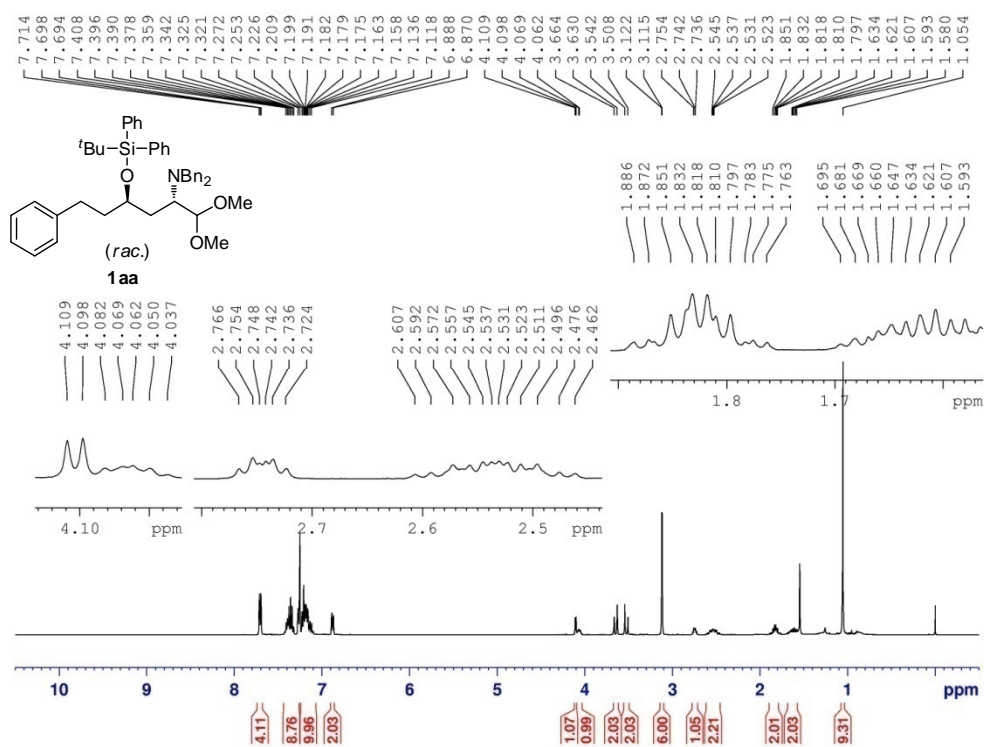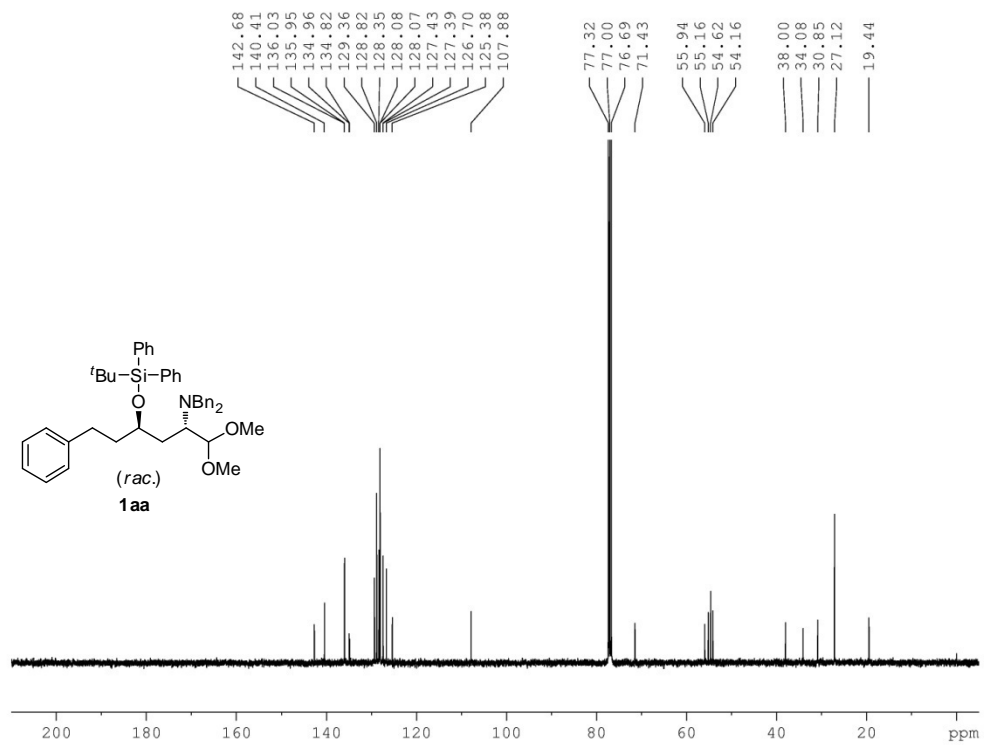

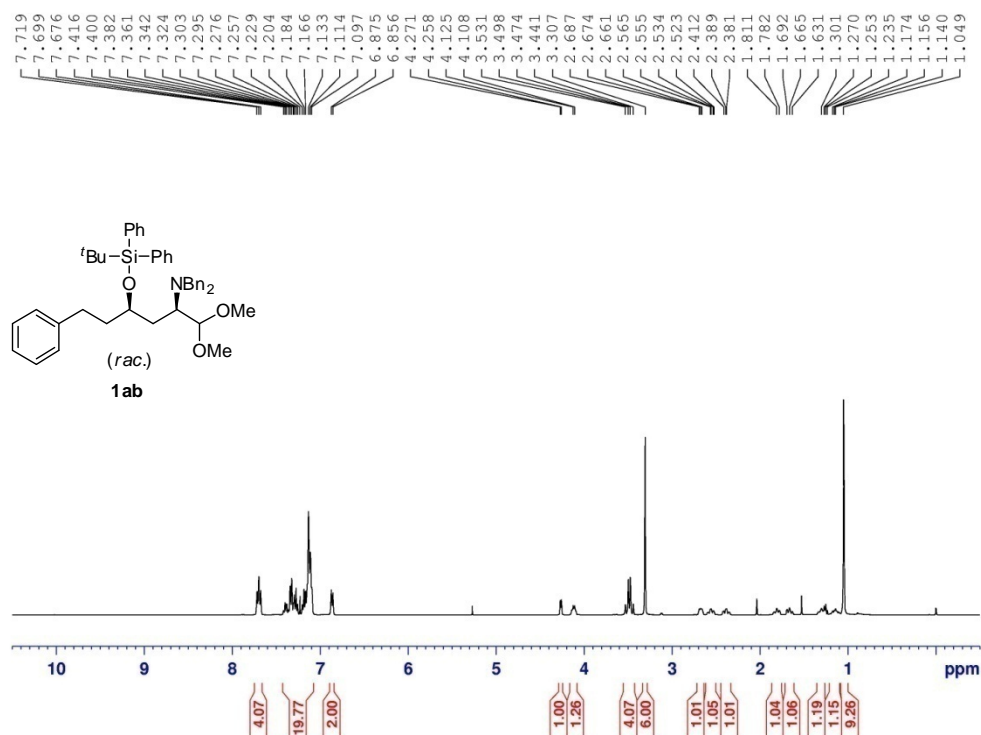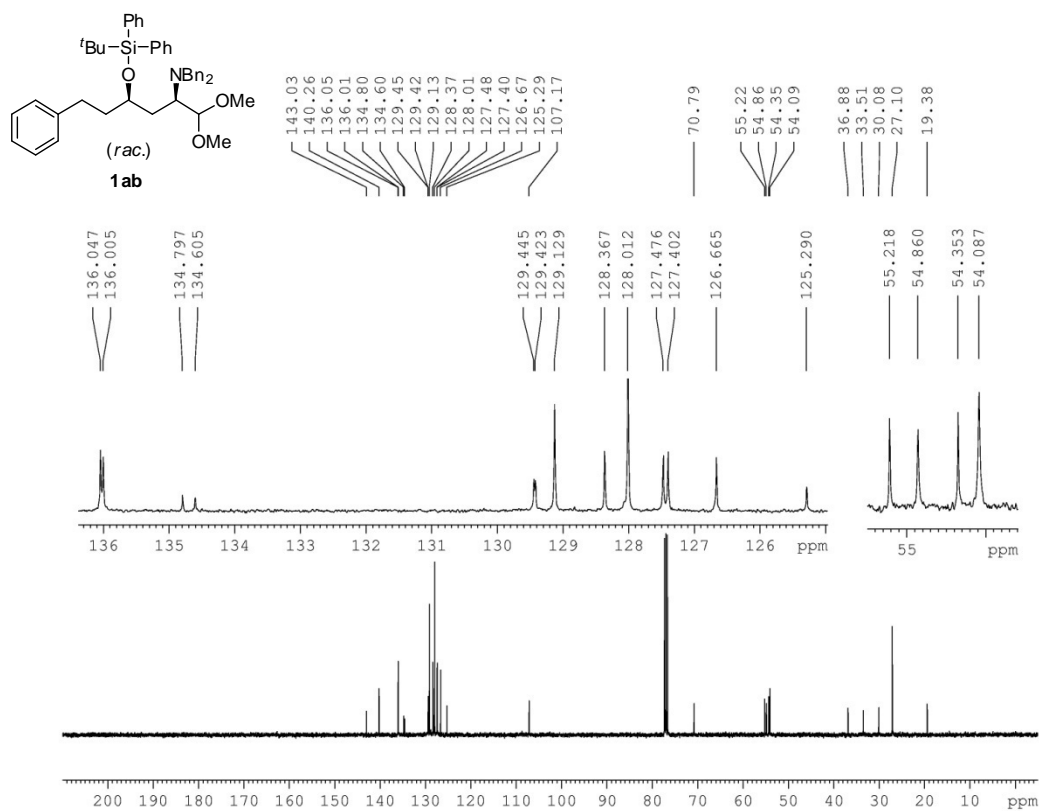

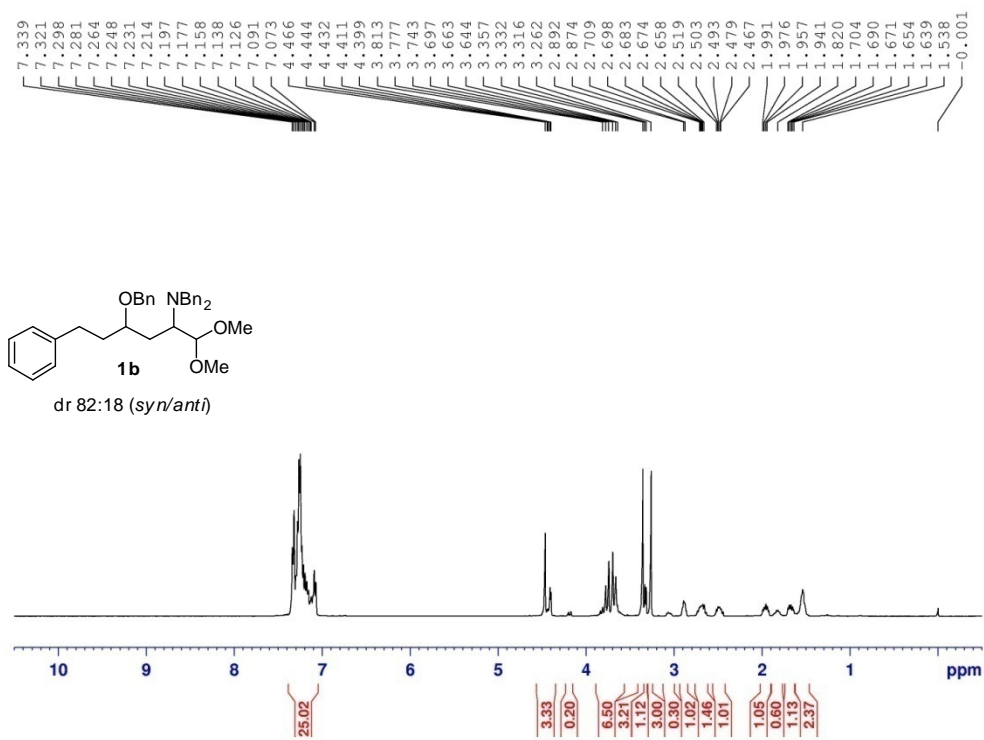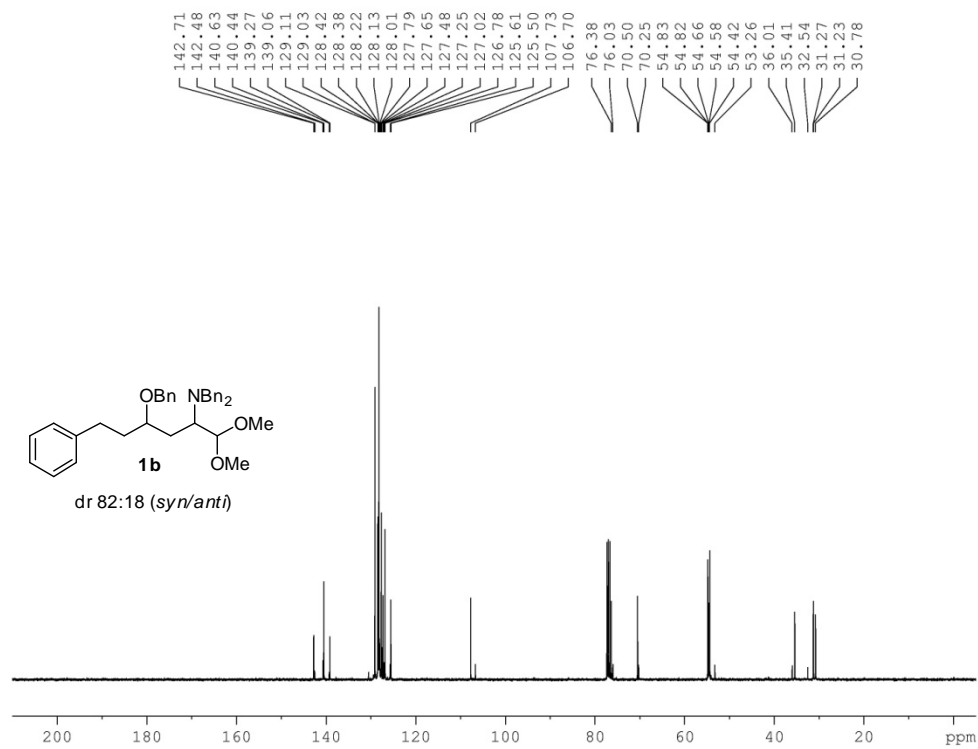



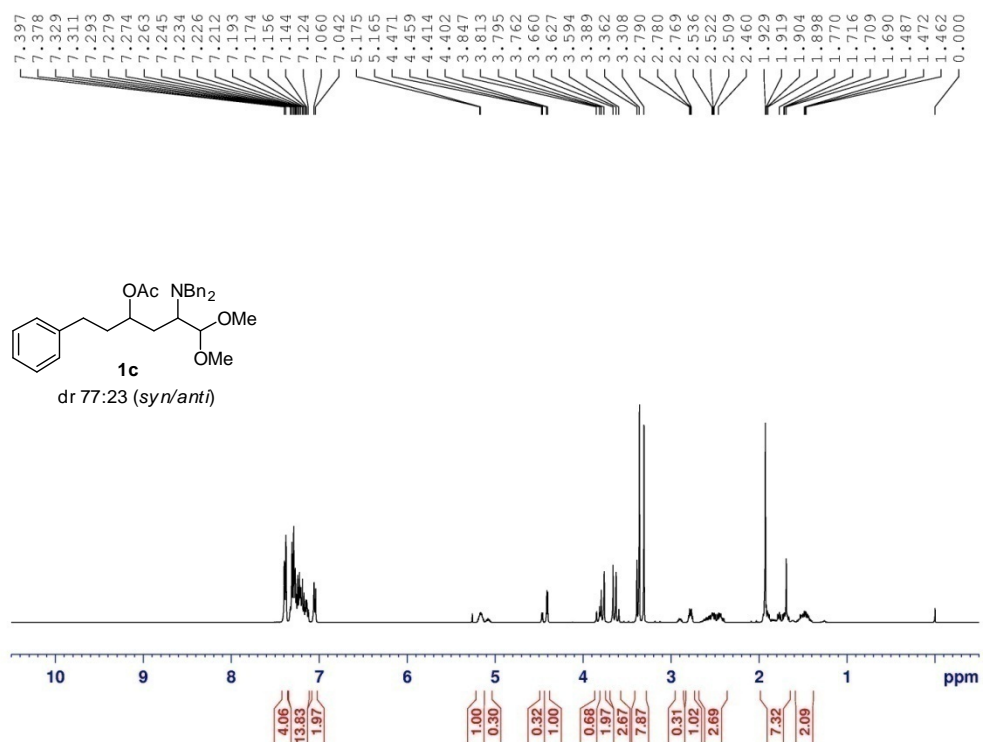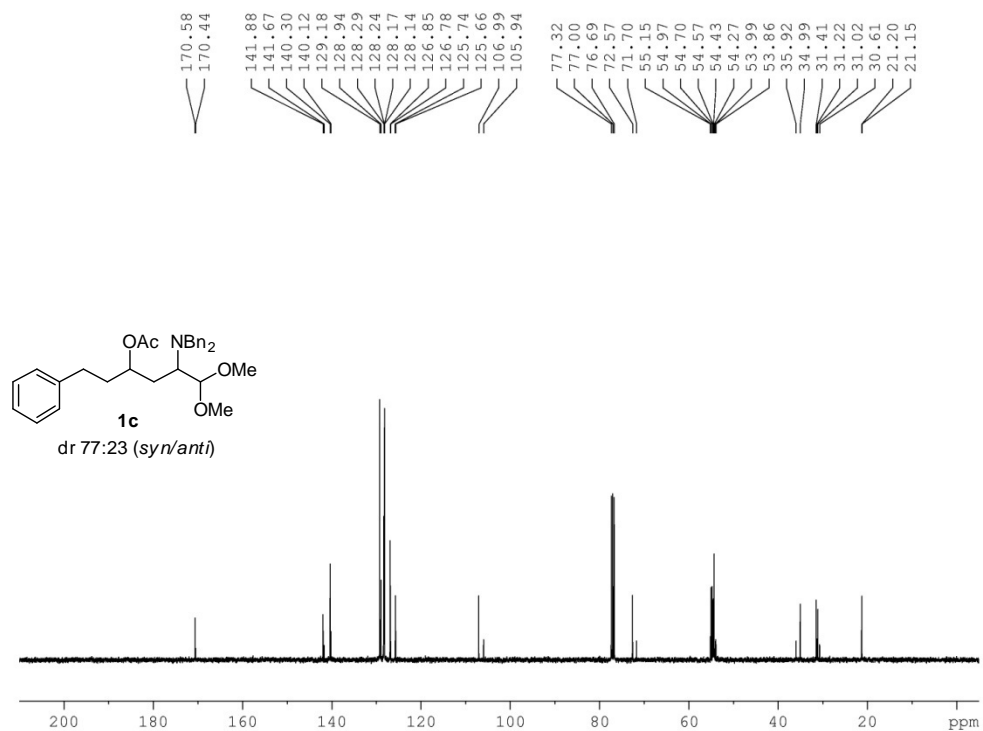

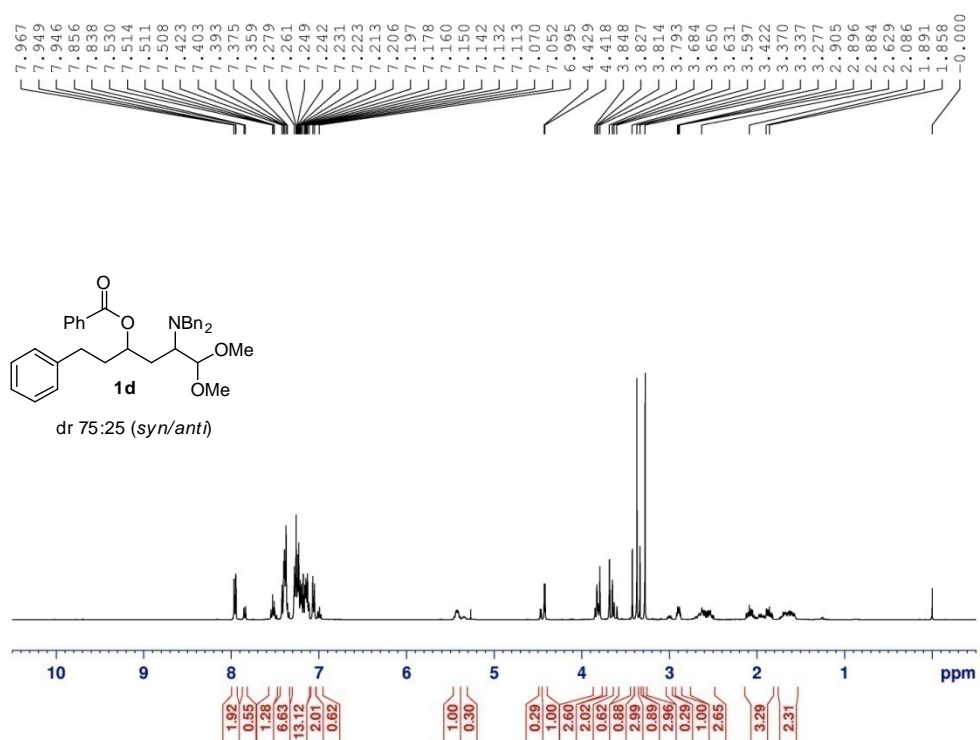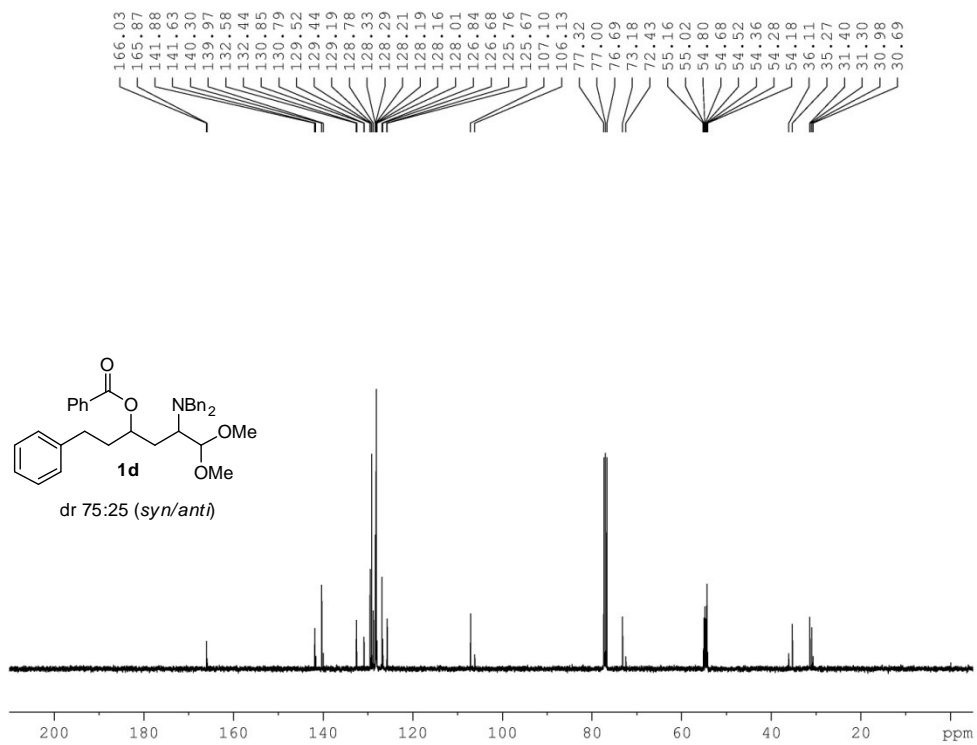

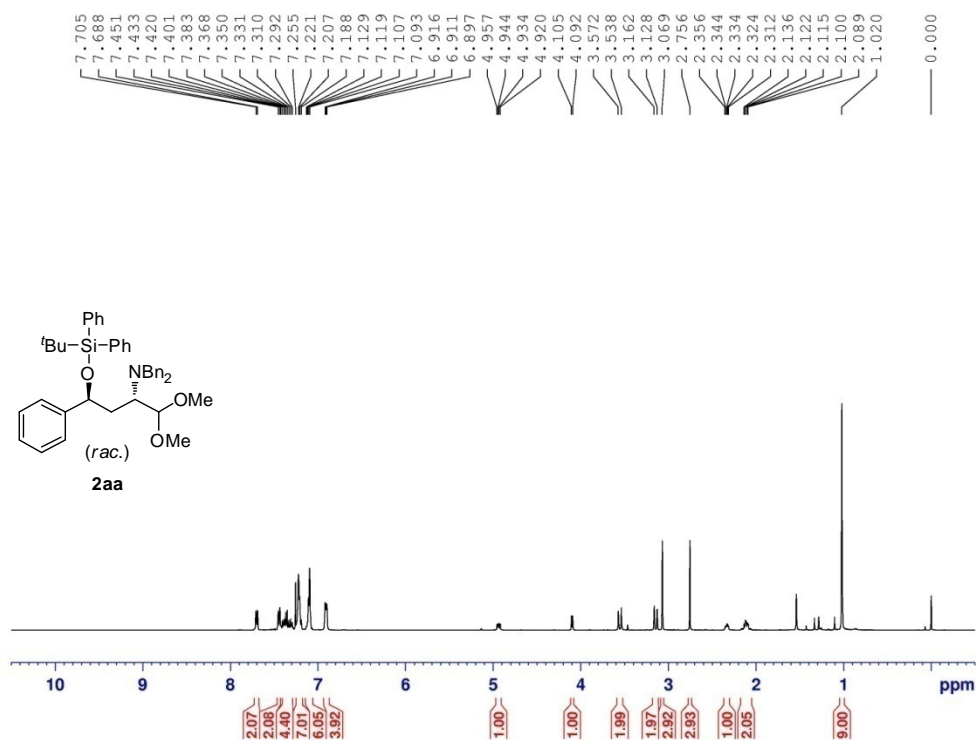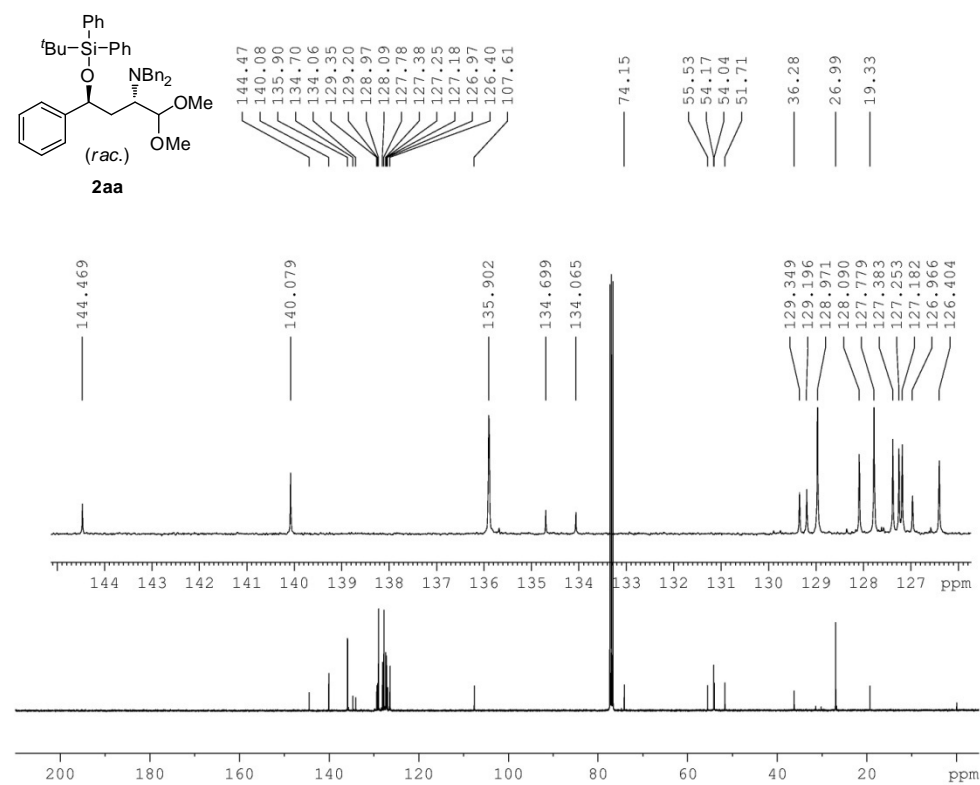



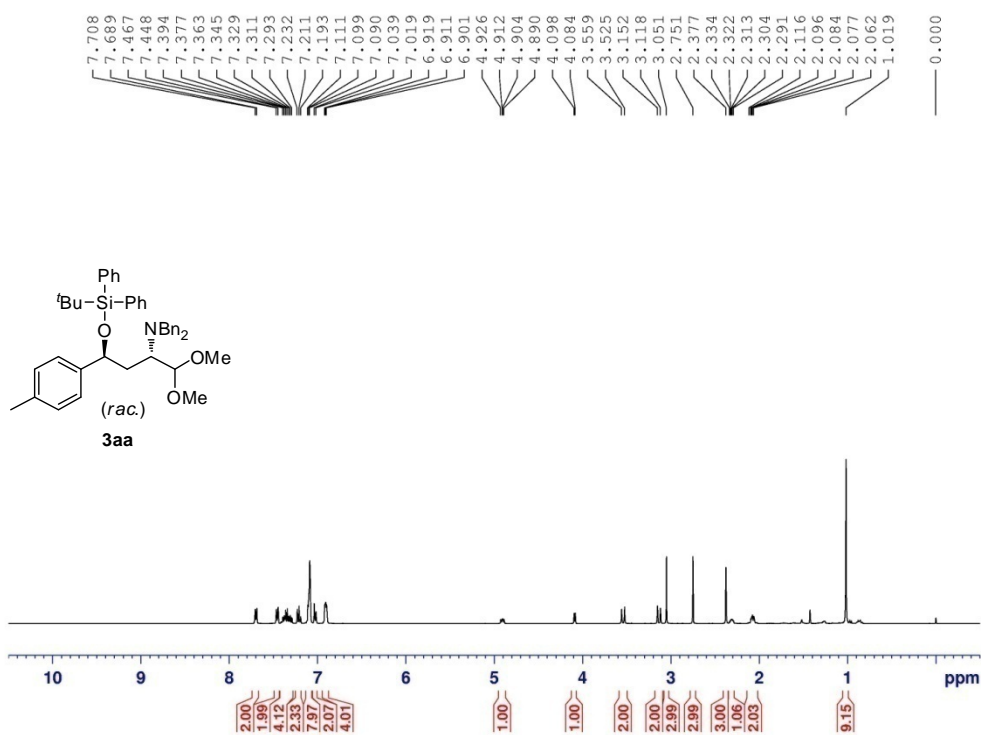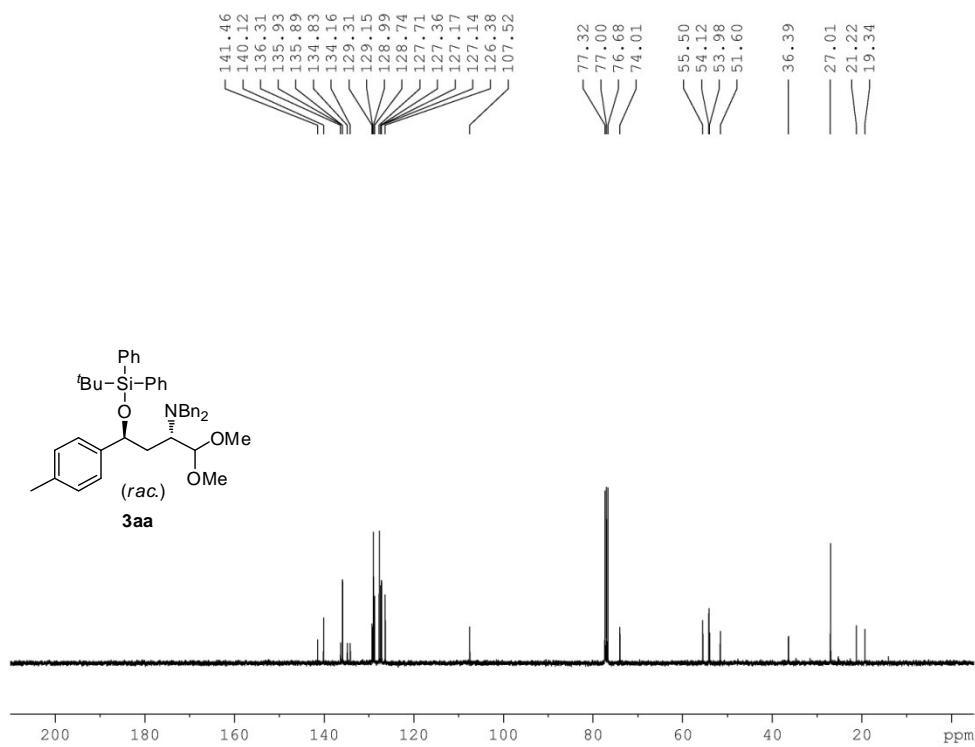

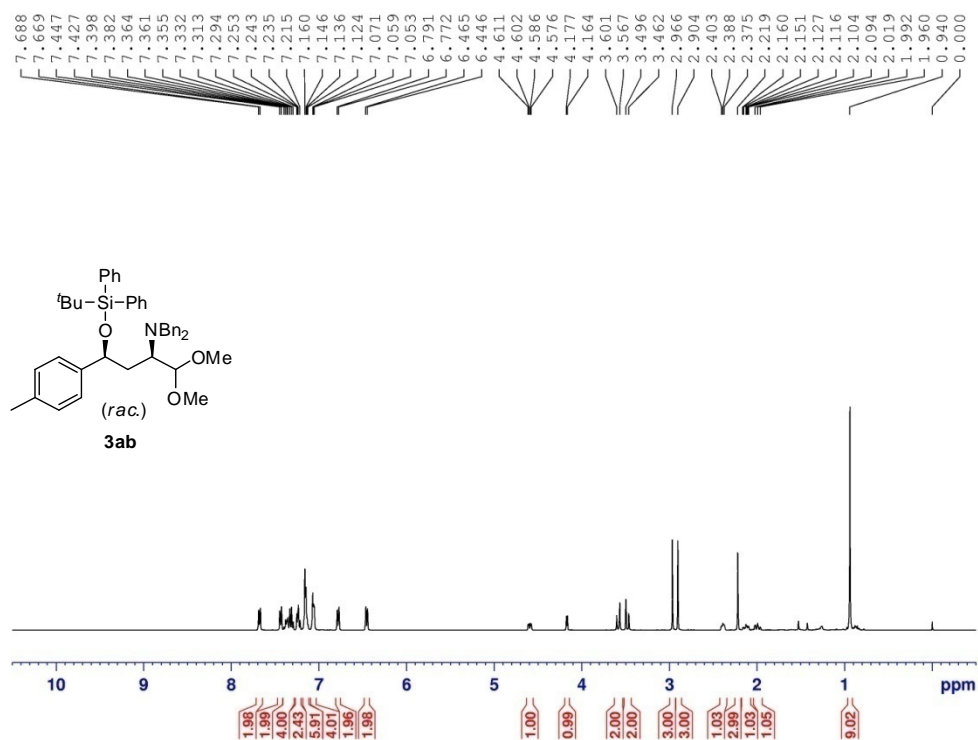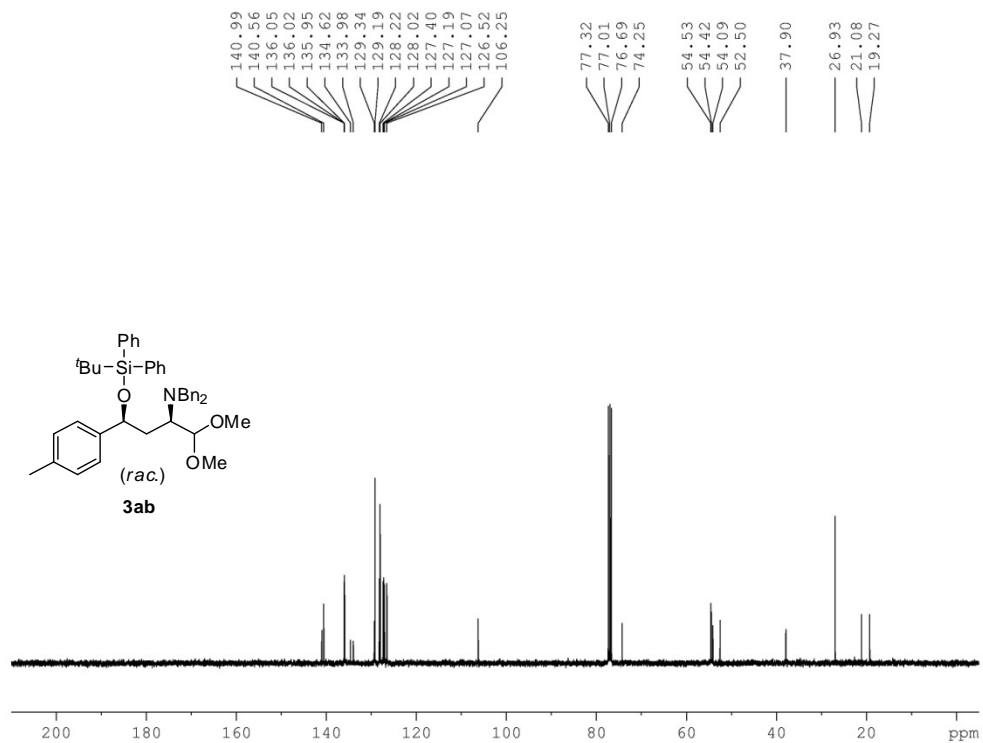

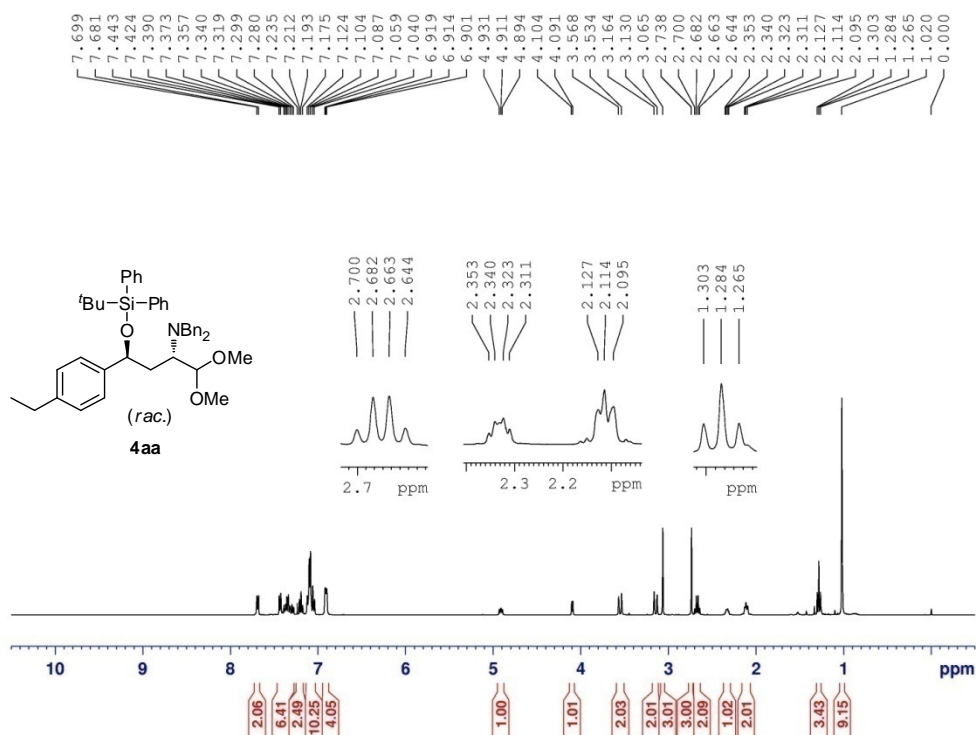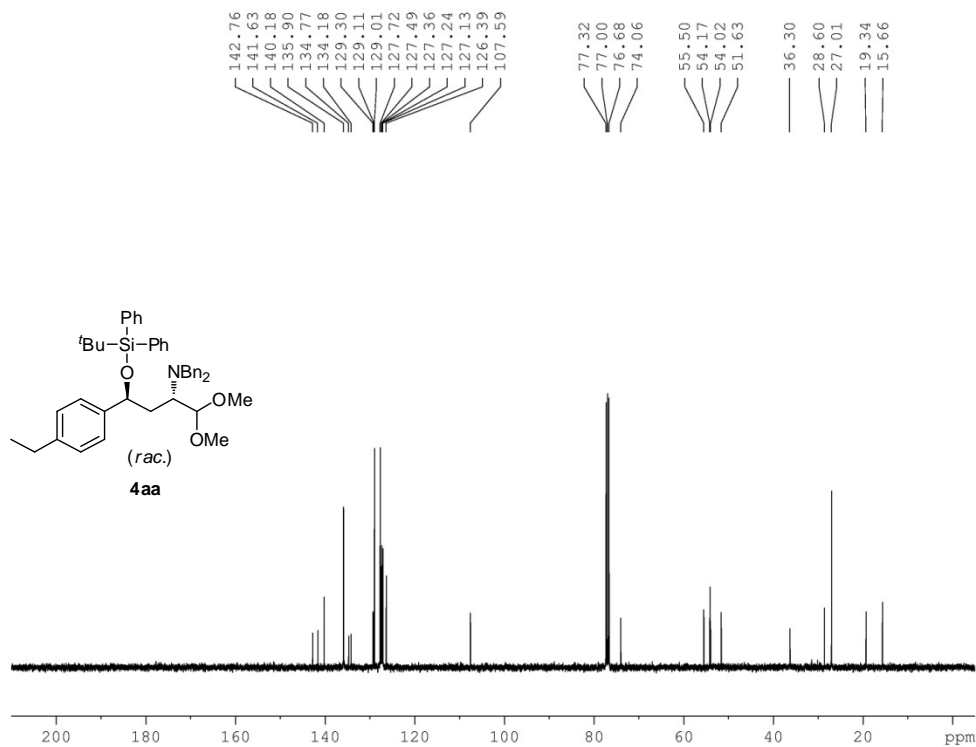

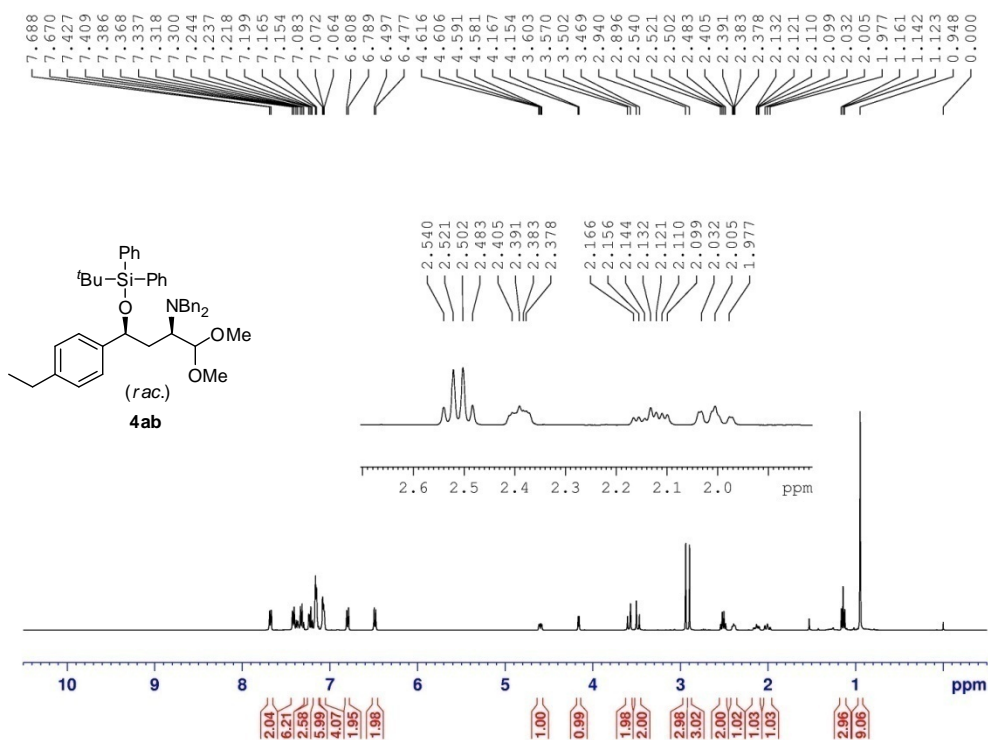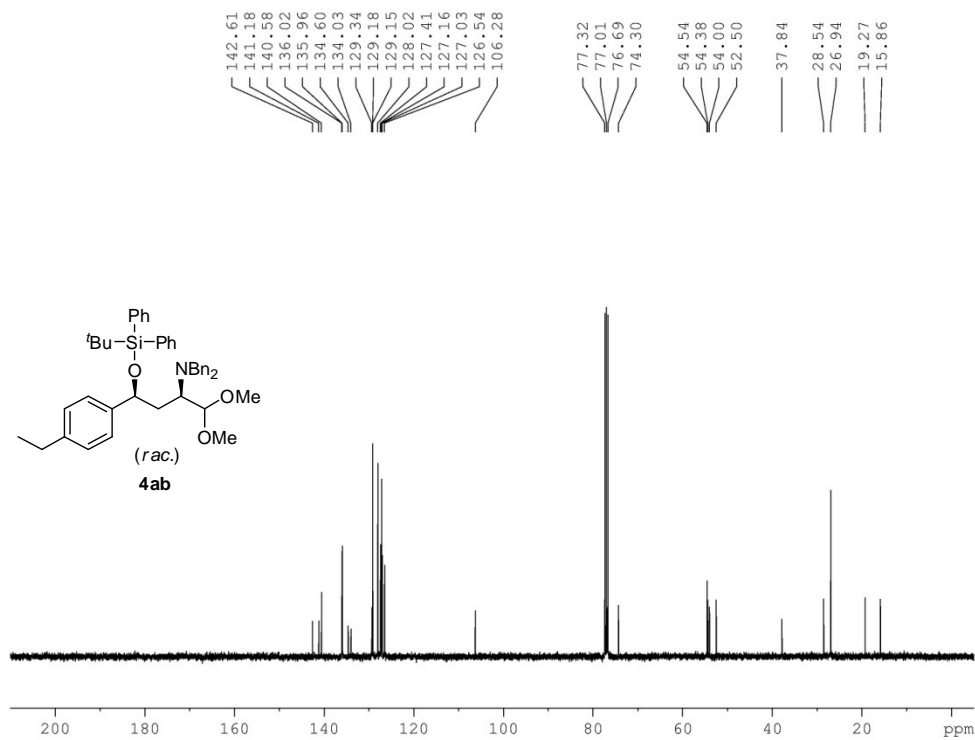



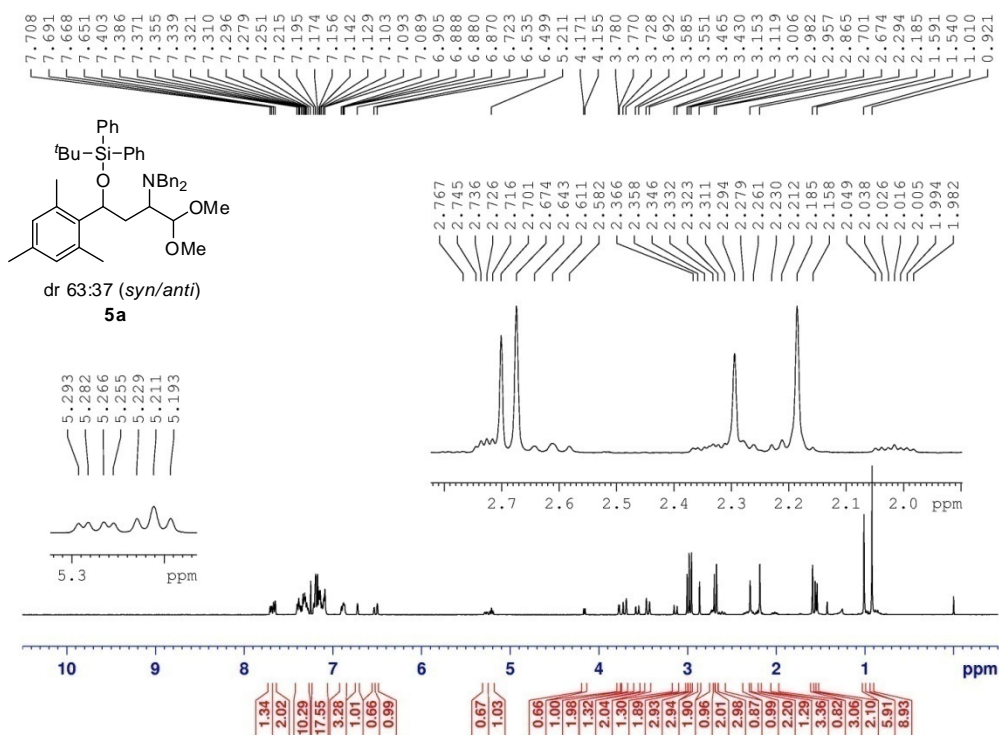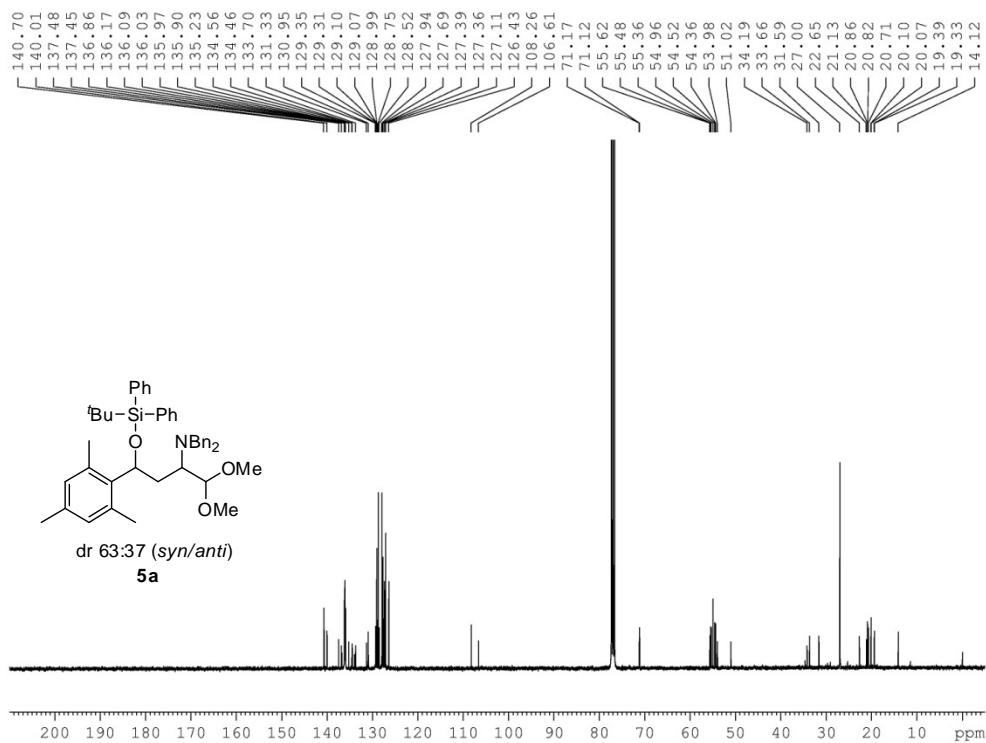

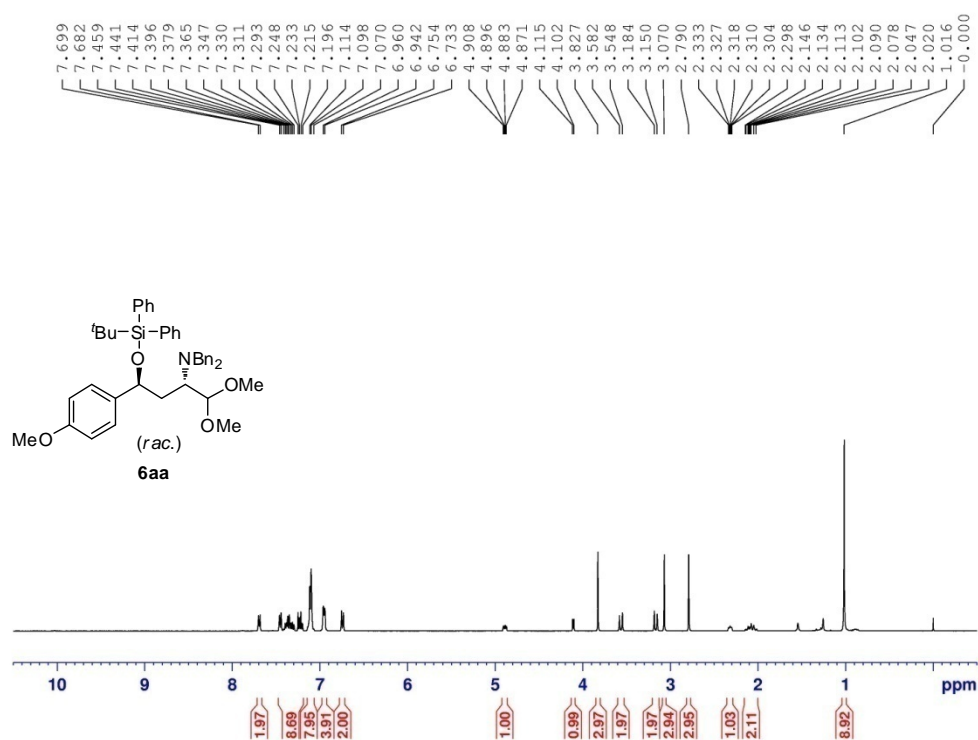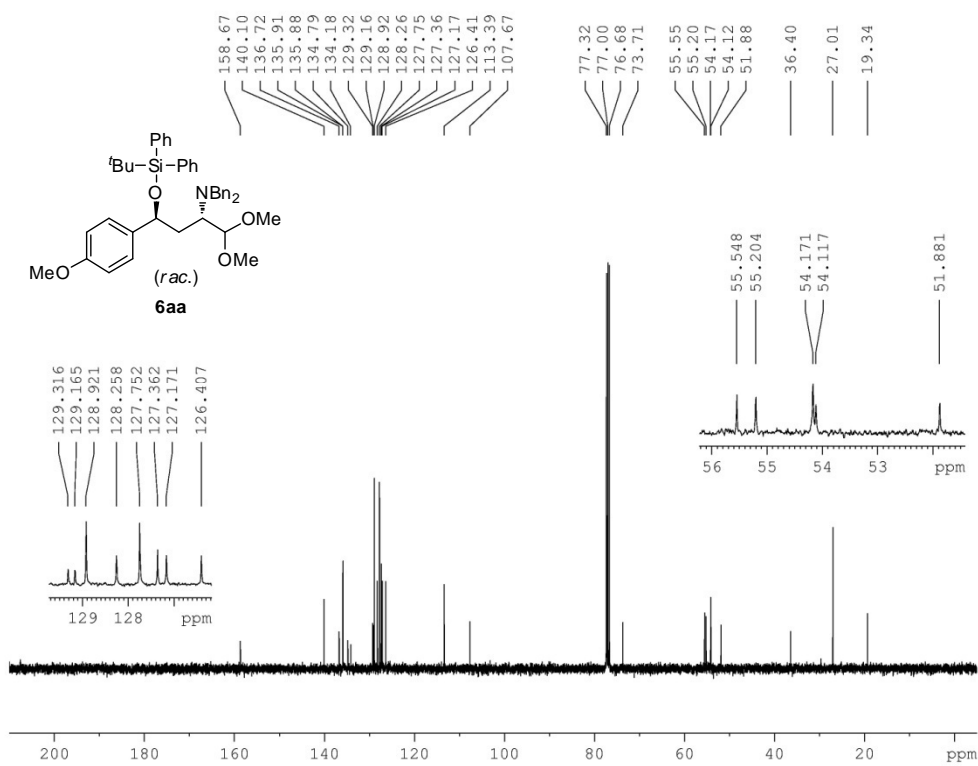

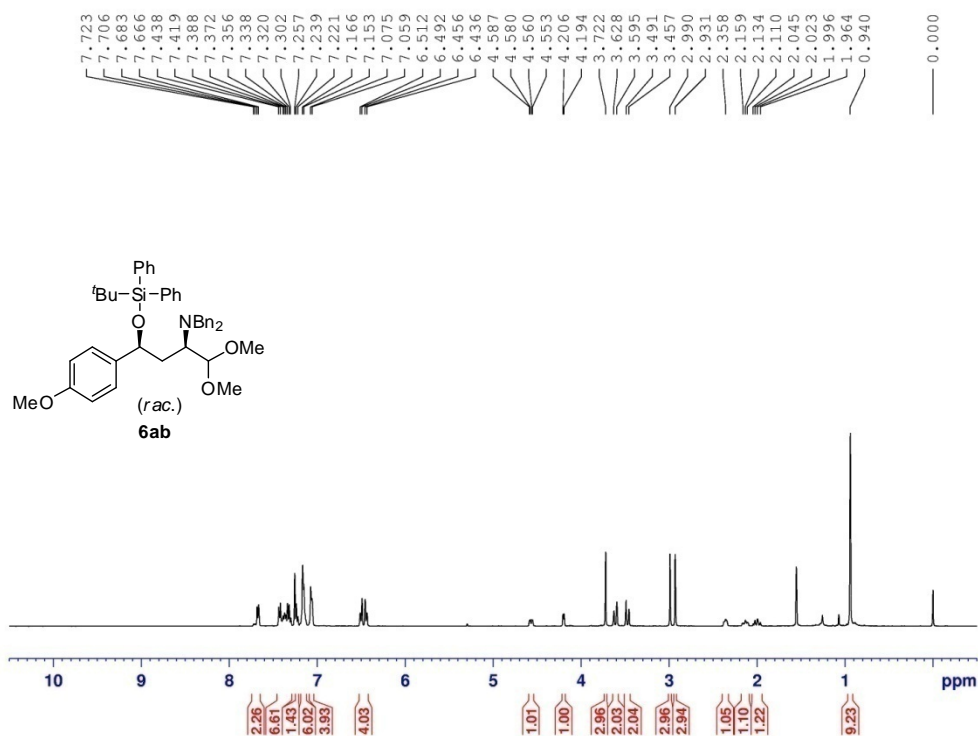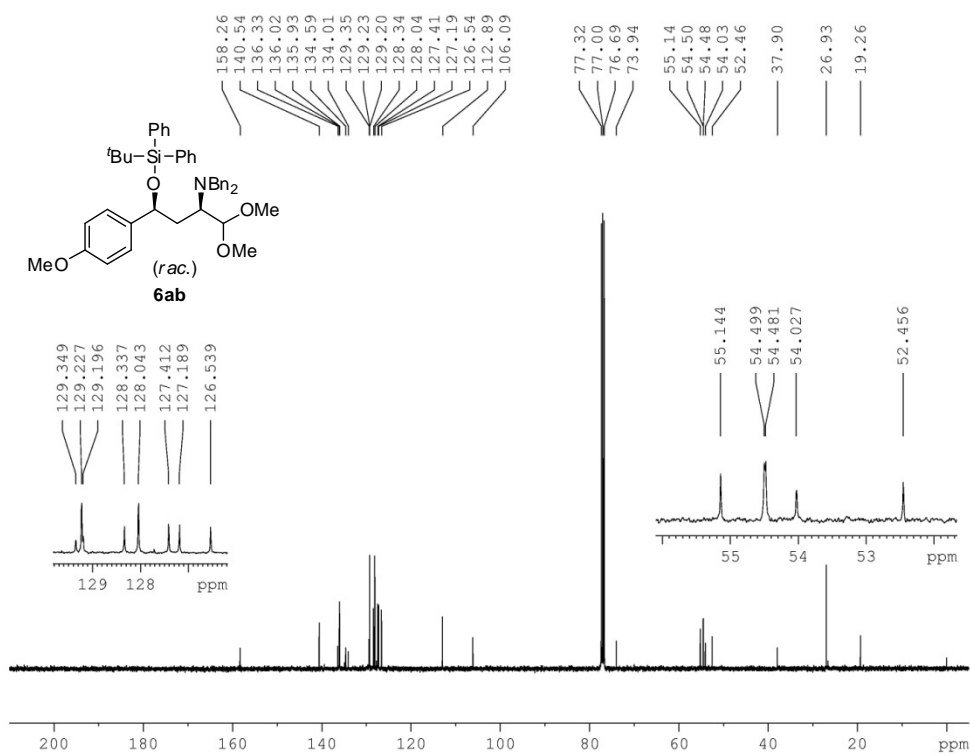

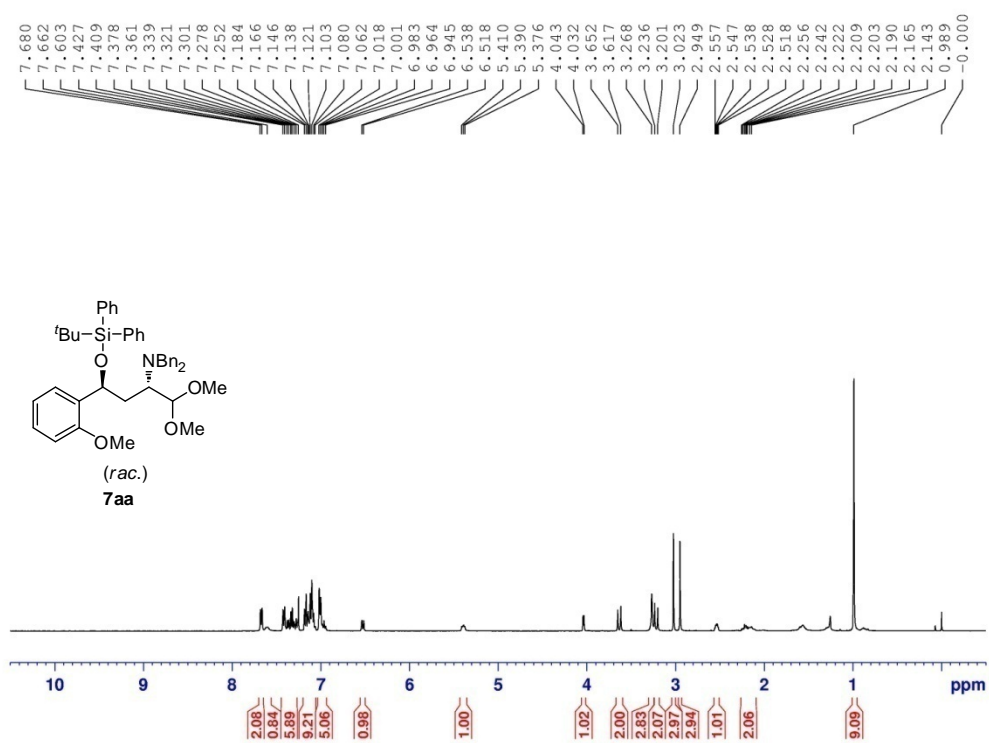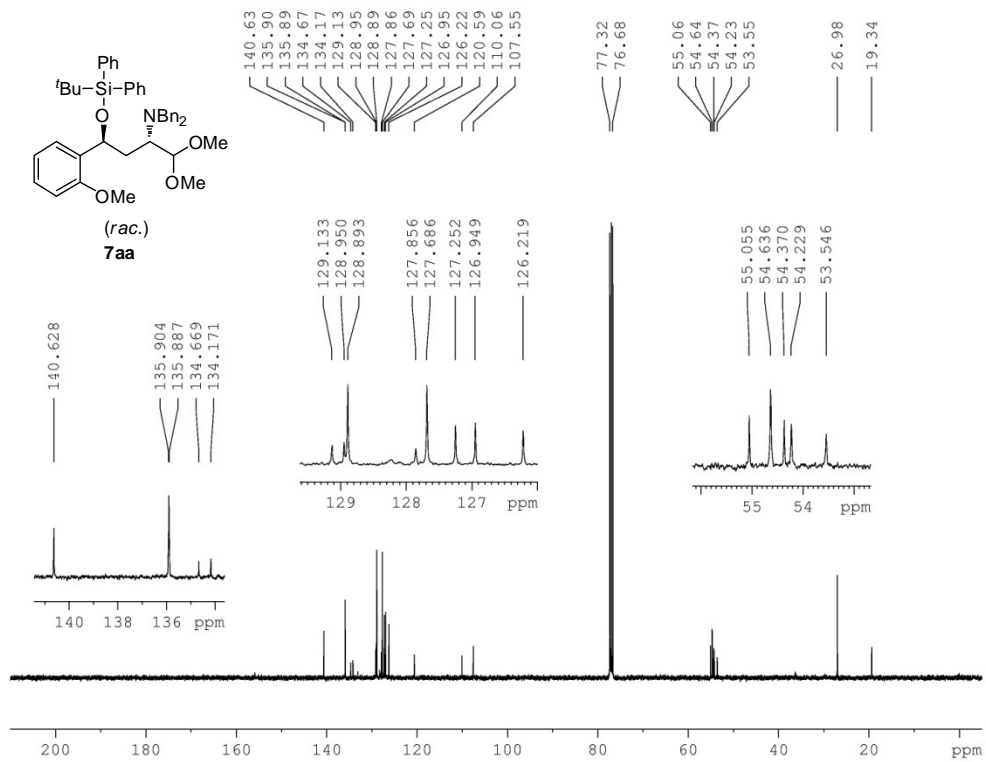

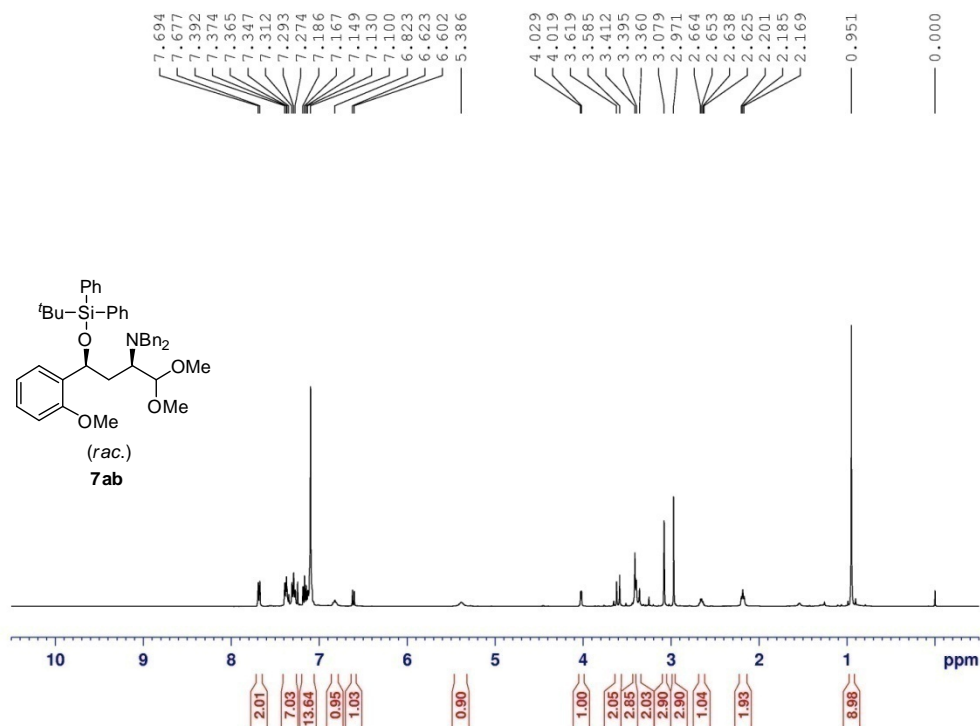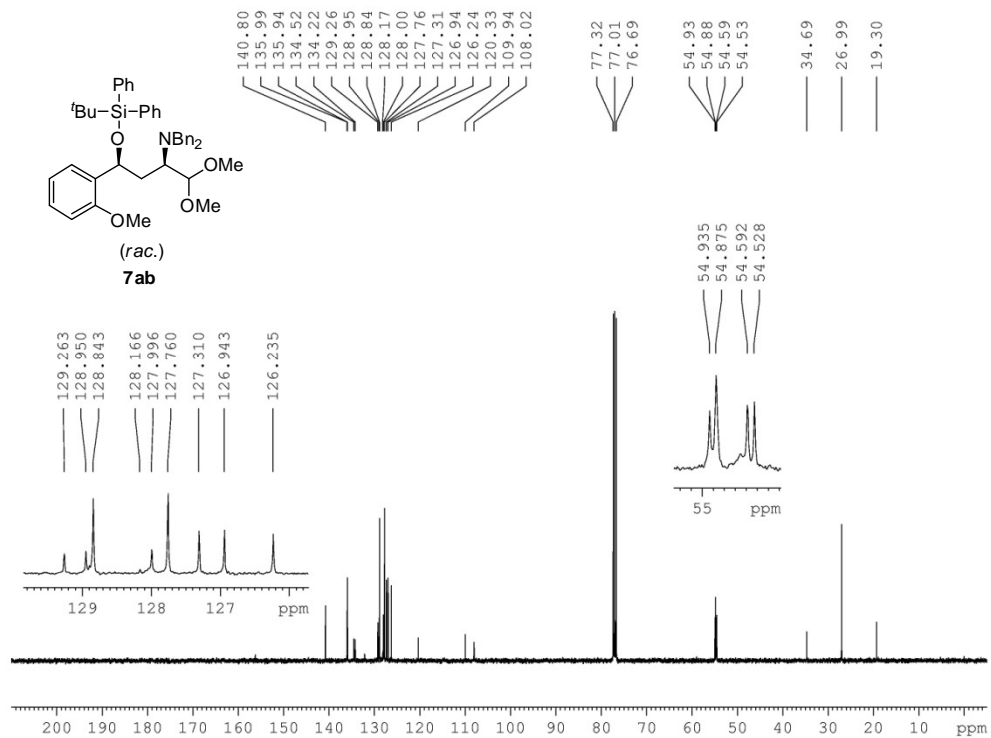

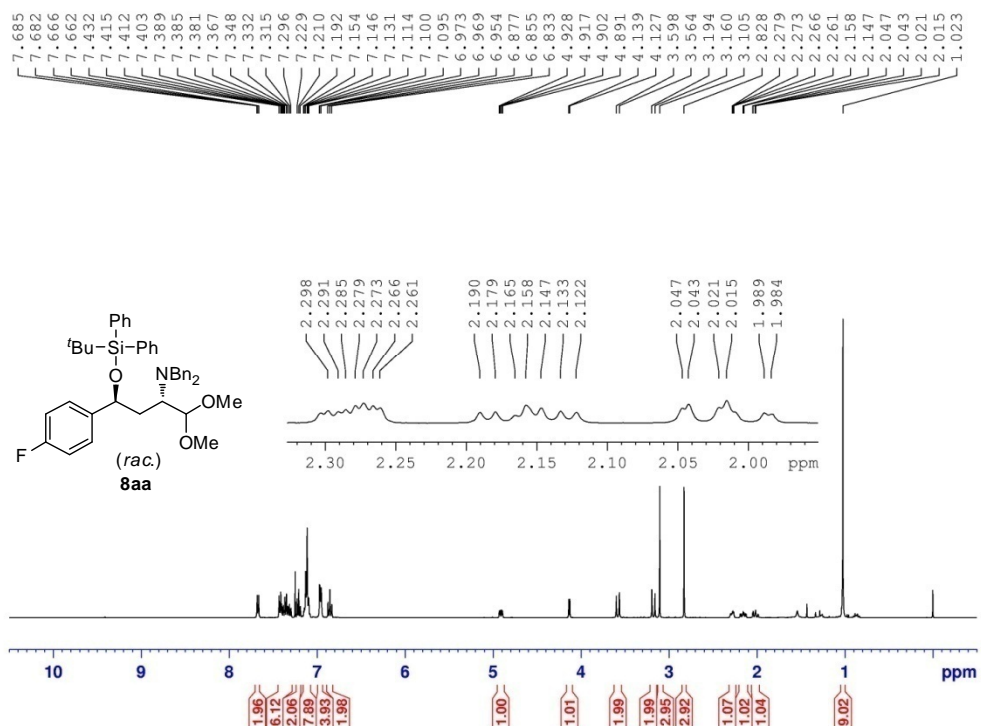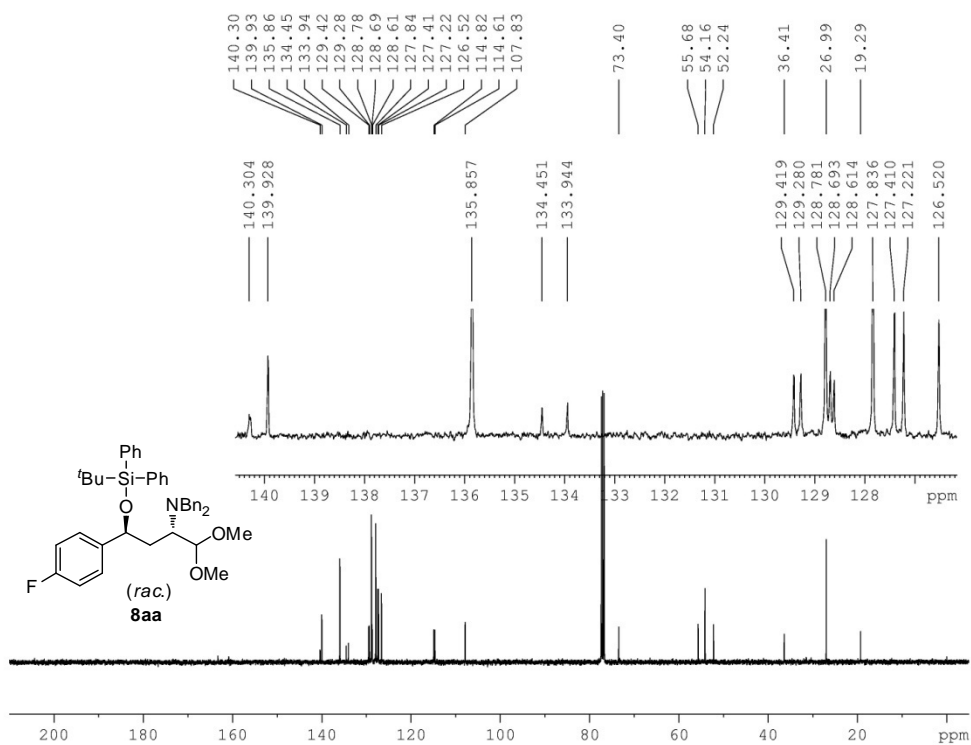

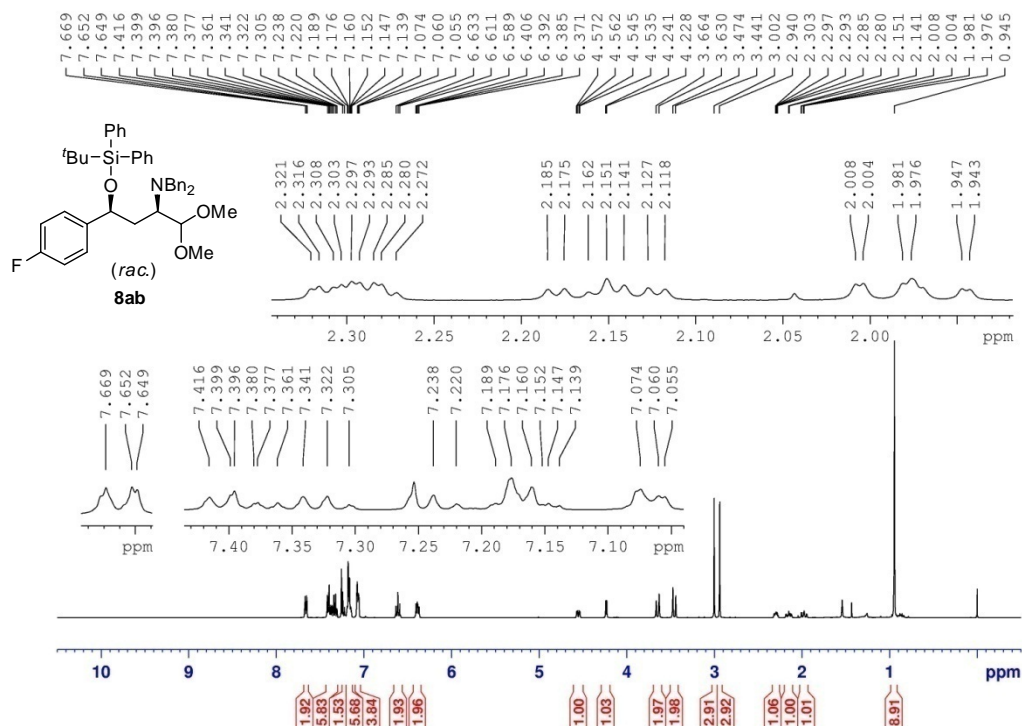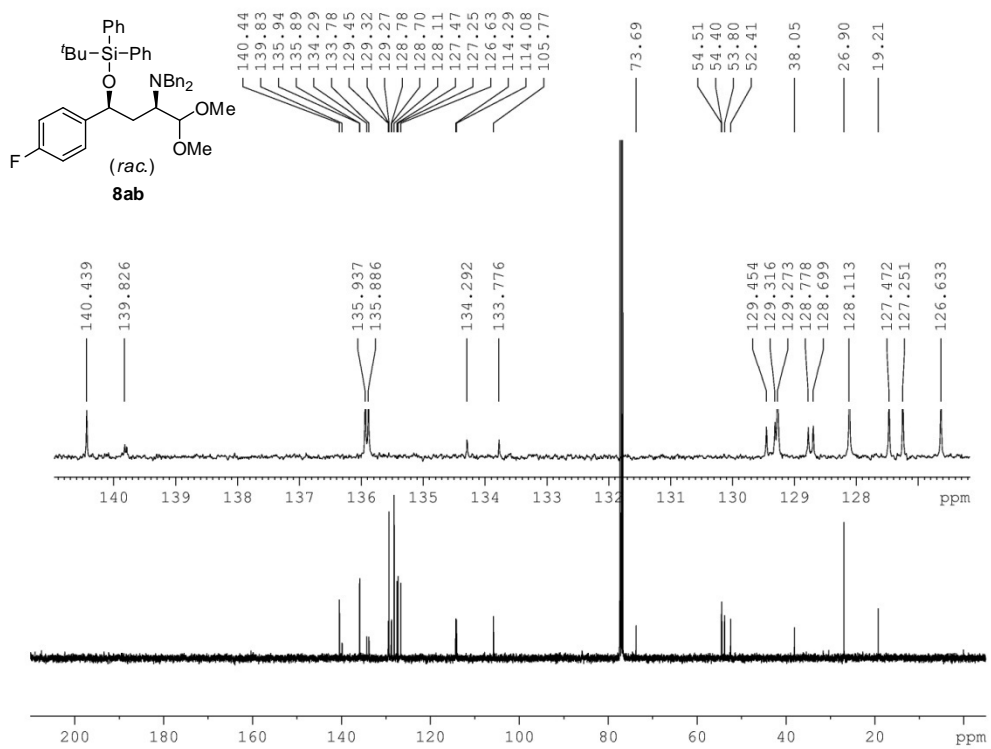



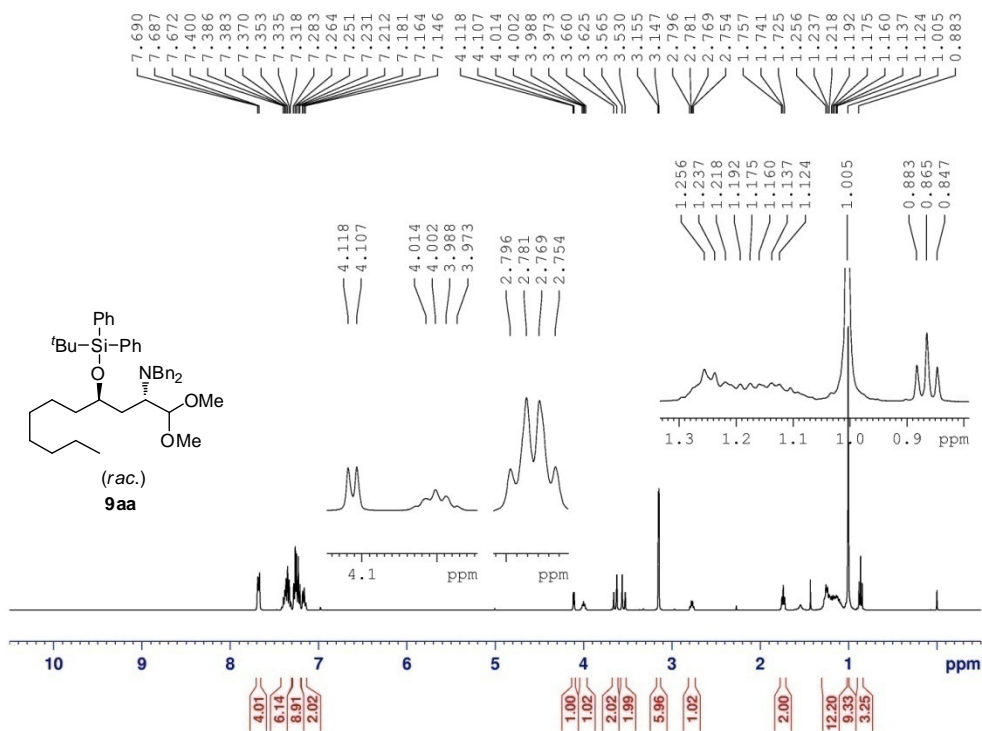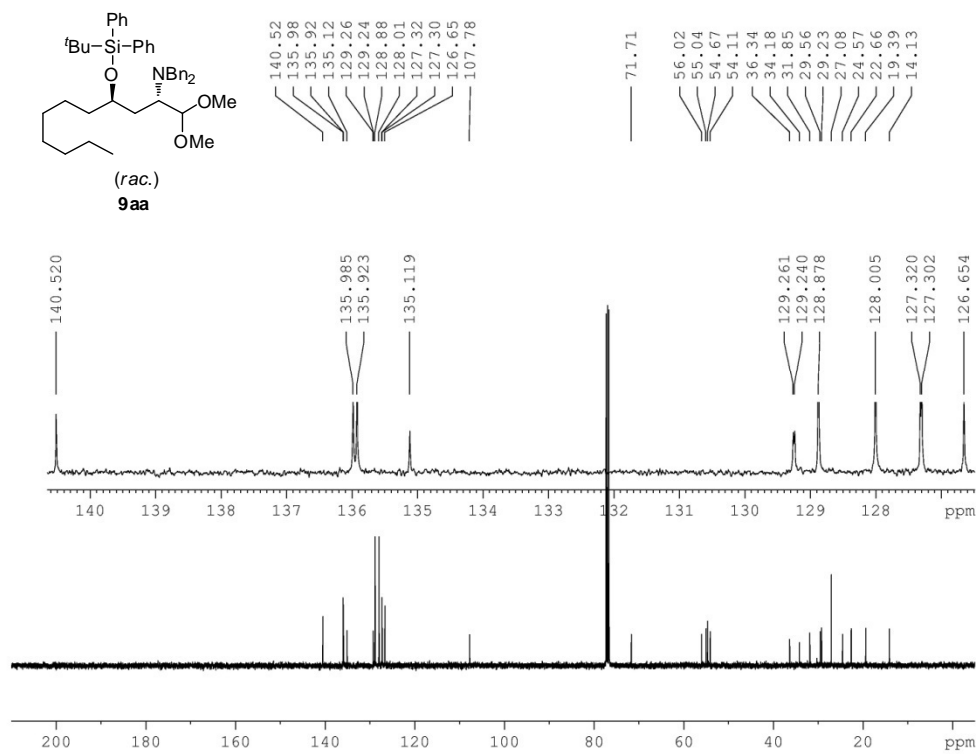



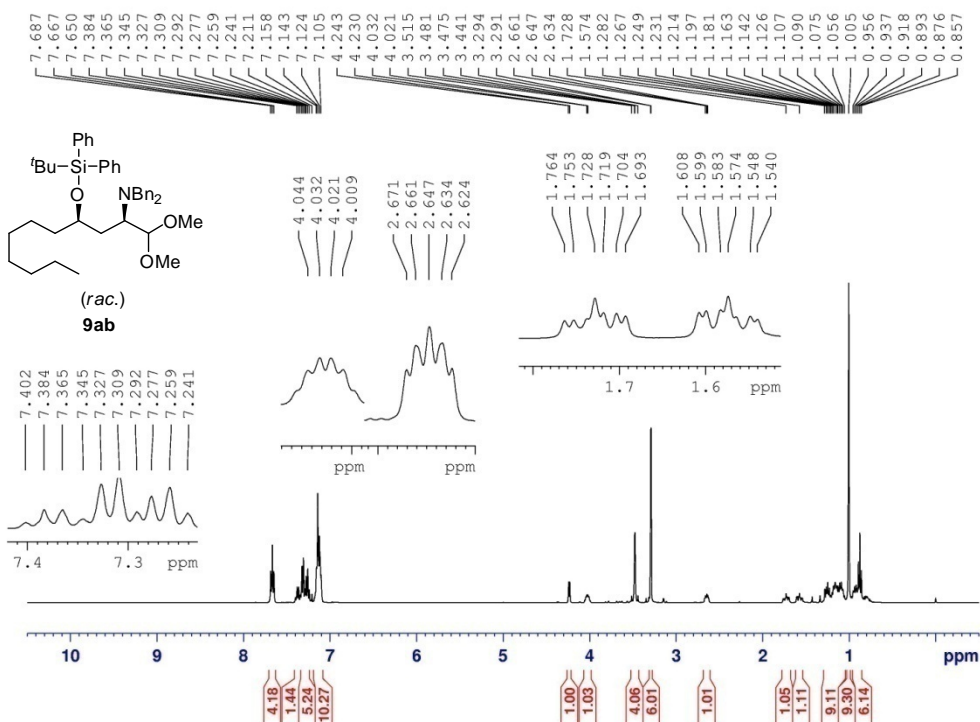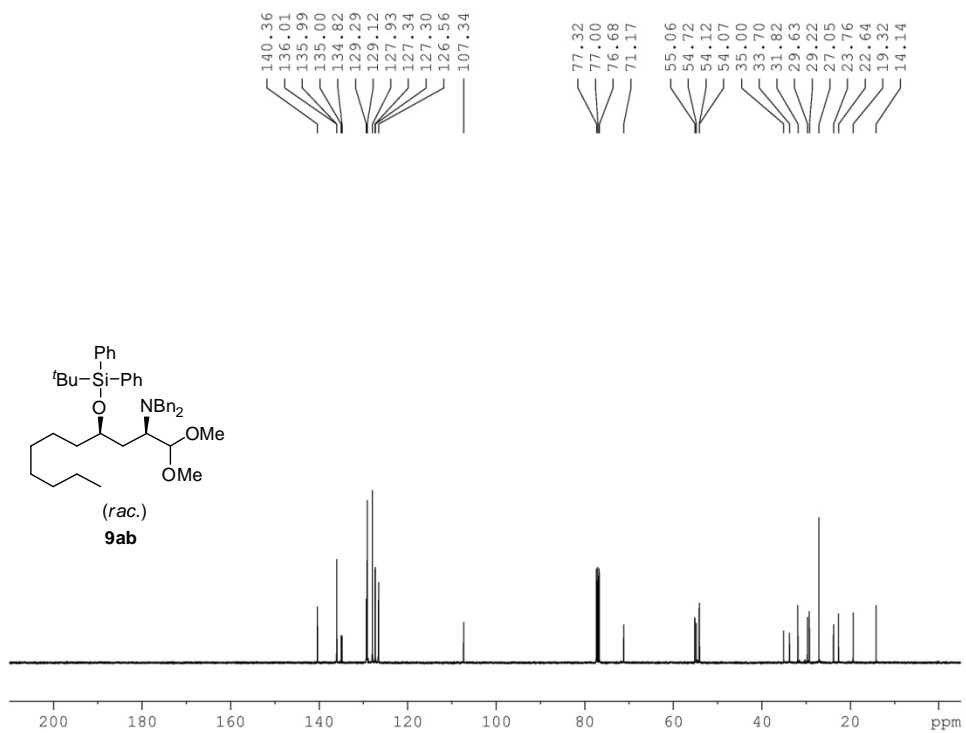

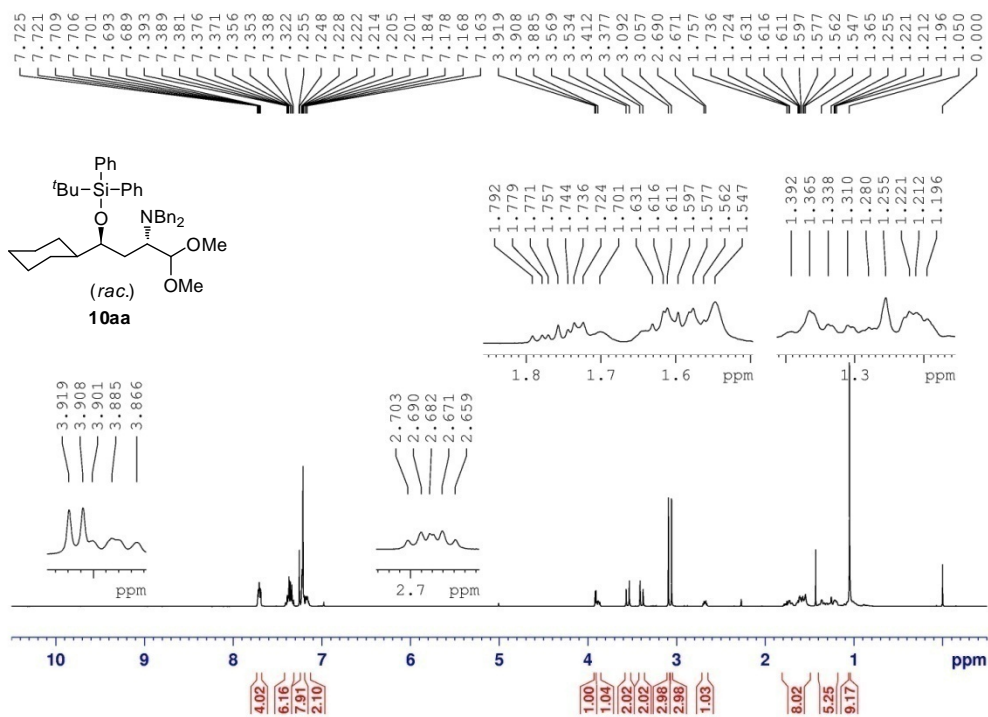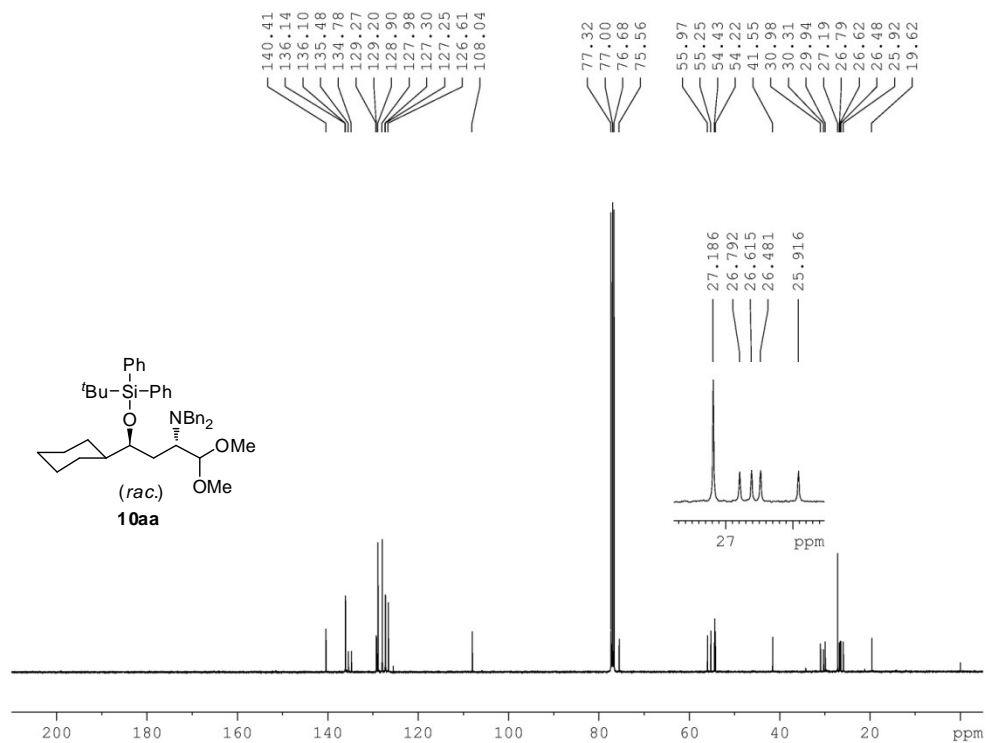

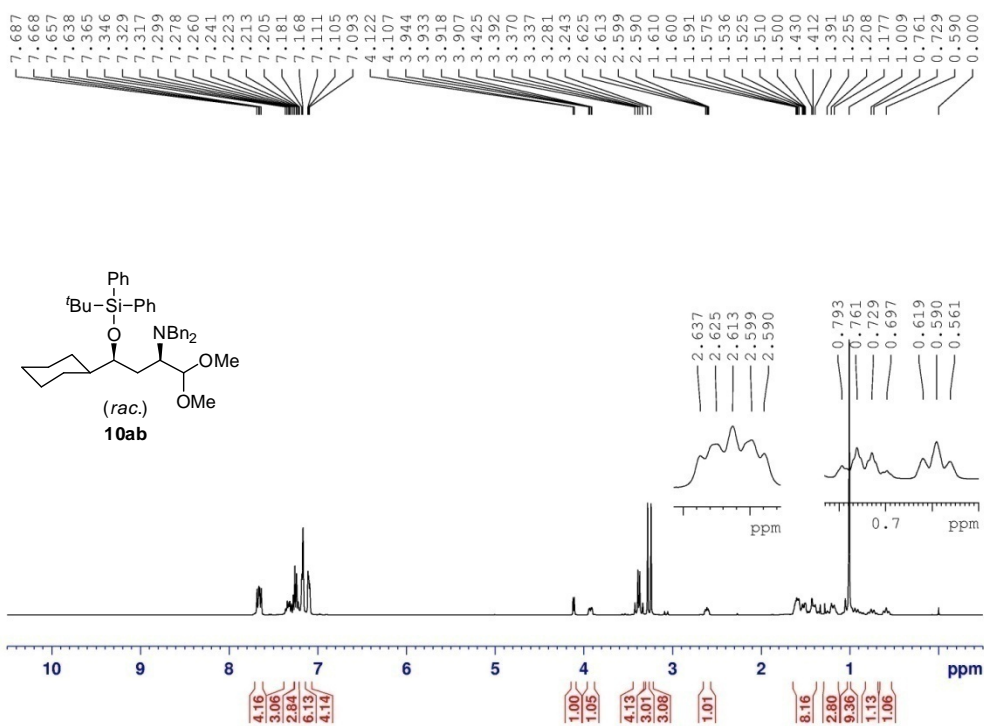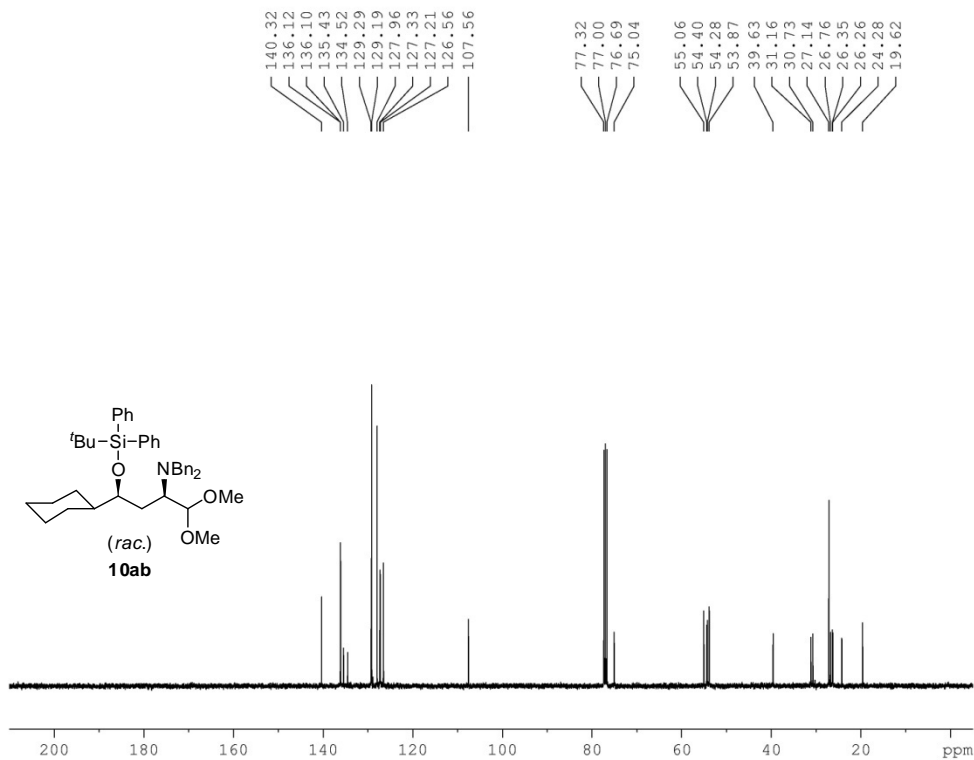

Supplement: c3ob42043d.pdf [file c3ob42043d.pdf]
